# Supplementary material for: An extracellular vesicle targeting ligand that binds to Arc proteins and facilitates Arc transport in vivo
Source: eLife journal article supplement (doi:10.7554/elife.82874), 2023-06-16
Supplement: fig2-data1 [file Fig 2e NTA Raw Data.xlsx]

## Sheet: Untransfected
Particle Size (nm)	Concentration (particles / ml)	Concentration (particles / ml)	Concentration (particles / ml)	Concentration Average (particles / ml)	Standard Error		Concentration (particles / ml)	Concentration (particles / ml)	Concentration (particles / ml)	Standard Error	Mean
0	0	0	0	0	0		0	0	0	0	0
1	0	0	0	0	0		0	0	0	0	0
2	0	0	0	0	0		0	0	0	0	0
3	0	0	0	0	0		0	0	0	0	0
4	0	0	0	0	0		0	0	0	0	0
5	0	0	0	0	0		0	0	0	0	0
6	0	0	0	0	0		0	0	0	0	0
7	0	0	0	0	0		0	0	0	0	0
8	0	0	0	0	0		0	0	0	0	0
9	0	0	26685	8895.1	8895.1		0	0	3110.14	1036.72	1036.71
10	0	0	690070	230020	230020		0	0	80427.7	26808.9	26809.2
11	0	0	4868500	1622800	1622800		0	0	567424	189138	189141
12	31162	0	10382000	3471000	3455400		3631.93	0	1.21002e+06	402727	404552
13	473270	62037	11257000	3930700	3664900		55159.7	7230.42	1.312e+06	427145	458132
14	3353400	985340	15393000	6577200	4460500		390839	114841	1.79406e+06	519872	766579
15	11213000	6631900	25010000	14285000	5523300		1.30688e+06	772949	2.91492e+06	643741	1.66491e+06
16	20033000	25139000	40431000	28534000	6128200		2.33485e+06	2.92995e+06	4.71224e+06	714242	3.32568e+06
17	27905000	58402000	58443000	48250000	10173000		3.25233e+06	6.80676e+06	6.81154e+06	1.18566e+06	5.62354e+06
18	47664000	96333000	90204000	78067000	15304000		5.55524e+06	1.12276e+07	1.05133e+07	1.78368e+06	9.09872e+06
19	86598000	137790000	148060000	124150000	19008000		1.0093e+07	1.60594e+07	1.72564e+07	2.21538e+06	1.44696e+07
20	140930000	195600000	222580000	186370000	24021000		1.64254e+07	2.27972e+07	2.59417e+07	2.79965e+06	2.17214e+07
21	203940000	271100000	294460000	256500000	27130000		2.37692e+07	3.15967e+07	3.43193e+07	3.162e+06	2.98951e+07
22	268410000	352310000	357100000	325940000	28799000		3.12832e+07	4.10618e+07	4.162e+07	3.35653e+06	3.79883e+07
23	337300000	432710000	426450000	398820000	30815000		3.93124e+07	5.04324e+07	4.97028e+07	3.59149e+06	4.64825e+07
24	421180000	517440000	522840000	487150000	33023000		4.90886e+07	6.03077e+07	6.09371e+07	3.84883e+06	5.67778e+07
25	519610000	620800000	648340000	596250000	39134000		6.05606e+07	7.23543e+07	7.55641e+07	4.56107e+06	6.9493e+07
26	622700000	756860000	786920000	722160000	50481000		7.25758e+07	8.82121e+07	9.17156e+07	5.88357e+06	8.41678e+07
27	728370000	928220000	920680000	859090000	65398000		8.48916e+07	1.08184e+08	1.07305e+08	7.62214e+06	1.00127e+08
28	842350000	1121700000	1043500000	1002500000	83201000		9.8176e+07	1.30734e+08	1.2162e+08	9.69709e+06	1.16843e+08
29	969650000	1318700000	1167000000	1151800000	101030000		1.13013e+08	1.53695e+08	1.36014e+08	1.17751e+07	1.3424e+08
30	1114200000	1509500000	1315000000	1312900000	114120000		1.2986e+08	1.75932e+08	1.53263e+08	1.33007e+07	1.53019e+08
31	1282600000	1698900000	1507800000	1496400000	120300000		1.49487e+08	1.98007e+08	1.75734e+08	1.4021e+07	1.74409e+08
32	1480700000	1897900000	1746200000	1708300000	121930000		1.72576e+08	2.212e+08	2.0352e+08	1.4211e+07	1.99099e+08
33	1704200000	2110800000	2009900000	1941600000	122230000		1.98625e+08	2.46014e+08	2.34254e+08	1.42459e+07	2.26298e+08
34	1937200000	2331600000	2270400000	2179700000	122550000		2.25781e+08	2.71748e+08	2.64615e+08	1.42832e+07	2.54048e+08
35	2164700000	2557300000	2509600000	2410500000	123680000		2.52296e+08	2.98054e+08	2.92494e+08	1.44149e+07	2.80948e+08
36	2384000000	2794700000	2727600000	2635400000	127210000		2.77855e+08	3.25723e+08	3.17902e+08	1.48263e+07	3.0716e+08
37	2604400000	3053500000	2938400000	2865400000	134670000		3.03543e+08	3.55886e+08	3.42471e+08	1.56958e+07	3.33967e+08
38	2841000000	3339300000	3161500000	3113900000	145780000		3.31119e+08	3.89196e+08	3.68473e+08	1.69907e+07	3.62929e+08
39	3100900000	3646800000	3409900000	3385900000	158030000		3.6141e+08	4.25035e+08	3.97424e+08	1.84184e+07	3.94623e+08
40	3381200000	3967400000	3687100000	3678500000	169270000		3.94079e+08	4.62401e+08	4.29732e+08	1.97284e+07	4.28737e+08
41	3671800000	4292500000	3987200000	3983800000	179190000		4.27949e+08	5.00291e+08	4.64709e+08	2.08846e+07	4.64316e+08
42	3962200000	4615000000	4298500000	4291900000	188460000		4.61795e+08	5.37879e+08	5.00991e+08	2.1965e+07	5.00221e+08
43	4248500000	4930700000	4610500000	4596500000	197050000		4.95163e+08	5.74674e+08	5.37354e+08	2.29662e+07	5.3573e+08
44	4532500000	5236800000	4915900000	4895100000	203590000		5.28263e+08	6.1035e+08	5.72949e+08	2.37284e+07	5.70521e+08
45	4818100000	5531700000	5212900000	5187600000	206370000		5.6155e+08	6.4472e+08	6.07564e+08	2.40524e+07	6.04611e+08
46	5108700000	5814200000	5505200000	5476000000	204170000		5.9542e+08	6.77646e+08	6.41632e+08	2.3796e+07	6.38232e+08
47	5404700000	6082600000	5797900000	5761800000	196540000		6.29918e+08	7.08928e+08	6.75746e+08	2.29068e+07	6.71531e+08
48	5703400000	6332800000	6092600000	6042900000	183380000		6.64732e+08	7.38089e+08	7.10093e+08	2.1373e+07	7.04305e+08
49	6003600000	6562600000	6387700000	6318000000	165100000		6.9972e+08	7.64872e+08	7.44487e+08	1.92424e+07	7.3636e+08
50	6304100000	6772200000	6676900000	6584400000	142830000		7.34744e+08	7.89301e+08	7.78193e+08	1.66469e+07	7.67413e+08
51	6604700000	6967100000	6954000000	6841900000	118670000		7.69779e+08	8.12016e+08	8.1049e+08	1.3831e+07	7.97428e+08
52	6904200000	7157300000	7216000000	7092500000	95673000		8.04685e+08	8.34184e+08	8.41026e+08	1.11507e+07	8.26632e+08
53	7197200000	7353000000	7463300000	7337800000	77163000		8.38834e+08	8.56993e+08	8.69848e+08	8.99336e+06	8.55225e+08
54	7478200000	7564000000	7701200000	7581100000	64938000		8.71585e+08	8.81585e+08	8.97576e+08	7.56853e+06	8.83582e+08
55	7740300000	7795600000	7936500000	7824100000	58380000		9.02133e+08	9.08578e+08	925000000	6.8042e+06	9.11904e+08
56	7978200000	8047000000	8172900000	8066000000	57005000		9.2986e+08	9.37879e+08	9.52552e+08	6.64394e+06	9.40097e+08
57	8190900000	8312900000	8412000000	8305300000	63935000		9.5465e+08	9.68869e+08	9.8042e+08	7.45163e+06	9.6798e+08
58	8380700000	8584000000	8650200000	8538300000	81079000		9.76772e+08	1.00047e+09	1.00818e+09	9.44977e+06	9.9514e+08
59	8552400000	8848000000	8880900000	8760400000	104430000		9.96783e+08	1.03124e+09	1.03507e+09	1.21713e+07	1.02103e+09
60	8712700000	9093500000	9097000000	8967700000	127500000		1.01547e+09	1.05985e+09	1.06026e+09	1.48601e+07	1.04519e+09
61	8866500000	9309400000	9291300000	9155700000	144730000		1.03339e+09	1.08501e+09	1.0829e+09	1.68683e+07	1.0671e+09
62	9017200000	9488300000	9460400000	9322000000	152590000		1.05096e+09	1.10586e+09	1.10261e+09	1.77844e+07	1.08648e+09
63	9165400000	9625500000	9603500000	9464800000	149860000		1.06823e+09	1.12185e+09	1.11929e+09	1.74662e+07	1.10312e+09
64	9309000000	9720200000	9723400000	9584200000	137600000		1.08497e+09	1.13289e+09	1.13326e+09	1.60373e+07	1.11704e+09
65	9445500000	9775800000	9825700000	9682300000	119280000		1.10087e+09	1.13937e+09	1.14519e+09	1.39021e+07	1.12848e+09
66	9571500000	9798700000	9917200000	9762400000	101420000		1.11556e+09	1.14204e+09	1.15585e+09	1.18205e+07	1.13782e+09
67	9682300000	9795500000	10002000000	9826600000	93636000		1.12847e+09	1.14167e+09	1.16573e+09	1.09133e+07	1.14529e+09
68	9775000000	9774700000	10084000000	9877900000	103090000		1.13928e+09	1.13924e+09	1.17529e+09	1.20152e+07	1.15127e+09
69	9847100000	9743500000	10163000000	9918000000	126270000		1.14768e+09	1.13561e+09	1.1845e+09	1.47168e+07	1.15593e+09
70	9896900000	9707700000	10237000000	9947200000	154930000		1.15348e+09	1.13143e+09	1.19312e+09	1.80571e+07	1.15935e+09
71	9924800000	9671400000	10302000000	9966100000	183260000		1.15674e+09	1.1272e+09	1.2007e+09	2.1359e+07	1.16155e+09
72	9931200000	9635900000	10353000000	9973500000	208150000		1.15748e+09	1.12307e+09	1.20664e+09	2.42599e+07	1.1624e+09
73	9919000000	9601800000	10387000000	9969400000	228150000		1.15606e+09	1.11909e+09	1.21061e+09	2.65909e+07	1.16192e+09
74	9891700000	9568800000	10403000000	9954400000	242810000		1.15288e+09	1.11524e+09	1.21247e+09	2.82995e+07	1.1602e+09
75	9852600000	9535400000	10400000000	9929200000	252390000		1.14832e+09	1.11135e+09	1.21212e+09	2.94161e+07	1.15726e+09
76	9805600000	9501900000	10380000000	9895800000	257430000		1.14284e+09	1.10745e+09	1.20979e+09	3.00035e+07	1.15336e+09
77	9753600000	9467700000	10346000000	9855700000	258560000		1.13678e+09	1.10346e+09	1.20583e+09	3.01352e+07	1.14869e+09
78	9698700000	9433700000	10300000000	9810900000	256320000		1.13038e+09	1.0995e+09	1.20047e+09	2.98741e+07	1.14345e+09
79	9642300000	9401700000	10245000000	9763200000	250960000		1.12381e+09	1.09577e+09	1.19406e+09	2.92494e+07	1.13788e+09
80	9585200000	9373600000	10184000000	9714200000	242600000		1.11716e+09	1.09249e+09	1.18695e+09	2.82751e+07	1.1322e+09
81	9527600000	9351200000	10116000000	9664800000	231090000		1.11044e+09	1.08988e+09	1.17902e+09	2.69336e+07	1.12645e+09
82	9468400000	9335000000	10041000000	9614700000	216440000		1.10354e+09	1.088e+09	1.17028e+09	2.52261e+07	1.12061e+09
83	9406900000	9325000000	9958500000	9563500000	198920000		1.09638e+09	1.08683e+09	1.16066e+09	2.31841e+07	1.11462e+09
84	9342300000	9320200000	9868600000	9510400000	179230000		1.08885e+09	1.08627e+09	1.15019e+09	2.08893e+07	1.10843e+09
85	9273900000	9318800000	9771200000	9454600000	158830000		1.08087e+09	1.08611e+09	1.13883e+09	1.85117e+07	1.10194e+09
86	9200100000	9316800000	9665800000	9394200000	139890000		1.07227e+09	1.08587e+09	1.12655e+09	1.63042e+07	1.0949e+09
87	9120600000	9311400000	9553300000	9328400000	125210000		1.06301e+09	1.08524e+09	1.11344e+09	1.45932e+07	1.08723e+09
88	9035100000	9299300000	9435300000	9256600000	117510000		1.05304e+09	1.08383e+09	1.09969e+09	1.36958e+07	1.07885e+09
89	8943200000	9277700000	9313200000	9178000000	117870000		1.04233e+09	1.08132e+09	1.08545e+09	1.37378e+07	1.0697e+09
90	8845500000	9244500000	9189000000	9093000000	124770000		1.03094e+09	1.07745e+09	1.07098e+09	1.4542e+07	1.05979e+09
91	8742300000	9198300000	9063600000	9001400000	135270000		1.01892e+09	1.07206e+09	1.05636e+09	1.57657e+07	1.04911e+09
92	8634200000	9138700000	8938300000	8903700000	146660000		1.00632e+09	1.06512e+09	1.04176e+09	1.70932e+07	1.03773e+09
93	8522500000	9066100000	8813900000	8800800000	157070000		9.93298e+08	1.05666e+09	1.02726e+09	1.83065e+07	1.02574e+09
94	8408400000	8981300000	8690300000	8693300000	165410000		980000000	1.04677e+09	1.01286e+09	1.92786e+07	1.01321e+09
95	8293400000	8886000000	8568300000	8582600000	171190000		9.66597e+08	1.03566e+09	9.98636e+08	1.99522e+07	1.0003e+09
96	8178700000	8781000000	8447000000	8468900000	174200000		9.53228e+08	1.02343e+09	9.84499e+08	2.0303e+07	9.87051e+08
97	8065600000	8668000000	8326800000	8353500000	174410000		9.40047e+08	1.01026e+09	9.7049e+08	2.03275e+07	9.73598e+08
98	7955300000	8548600000	8207600000	8237200000	171910000		9.27191e+08	9.9634e+08	9.56597e+08	2.00361e+07	9.60043e+08
99	7849000000	8424000000	8090000000	8121000000	166740000		9.14802e+08	9.81818e+08	9.4289e+08	1.94336e+07	9.46503e+08
100	7747600000	8296100000	7974500000	8006100000	159140000		9.02984e+08	9.66911e+08	9.29429e+08	1.85478e+07	9.33108e+08
101	7651100000	8165400000	7861100000	7892500000	149280000		8.91737e+08	9.51678e+08	9.16212e+08	1.73986e+07	9.19876e+08
102	7560400000	8033300000	7750500000	7781400000	137390000		8.81166e+08	9.36282e+08	9.03322e+08	1.60128e+07	9.06923e+08
103	7475300000	7901000000	7643000000	7673100000	123790000		8.71247e+08	9.20862e+08	8.90793e+08	1.44277e+07	8.94301e+08
104	7396300000	7769700000	7539000000	7568300000	108780000		8.6204e+08	9.05559e+08	8.78671e+08	1.26783e+07	8.8209e+08
105	7322600000	7639900000	7437700000	7466700000	92738000		8.5345e+08	8.90431e+08	8.66865e+08	1.08086e+07	8.70249e+08
106	7254100000	7512600000	7339000000	7368600000	76066000		8.45466e+08	8.75594e+08	8.55361e+08	8.8655e+06	8.58807e+08
107	7190700000	7388600000	7242400000	7273900000	59265000		8.38077e+08	8.61142e+08	8.44103e+08	6.90734e+06	8.47774e+08
108	7131400000	7268100000	7147100000	7182200000	43192000		8.31166e+08	8.47098e+08	8.32995e+08	5.03403e+06	8.37086e+08
109	7075800000	7151800000	7052700000	7093500000	29942000		8.24685e+08	8.33543e+08	8.21993e+08	3.48974e+06	8.2674e+08
110	7022600000	7039300000	6958200000	7006700000	24717000		8.18485e+08	8.20431e+08	8.10979e+08	2.88077e+06	8.16632e+08
111	6970600000	6930500000	6863300000	6921500000	31294000		8.12424e+08	8.07751e+08	7.99918e+08	3.64732e+06	8.06698e+08
112	6918500000	6824800000	6767900000	6837100000	43921000		8.06352e+08	7.95431e+08	7.888e+08	5.119e+06	7.96861e+08
113	6864900000	6721900000	6671800000	6752900000	57868000		8.00105e+08	7.83438e+08	7.77599e+08	6.74452e+06	7.87047e+08
114	6808400000	6621000000	6575300000	6668200000	71306000		7.9352e+08	7.71678e+08	7.66352e+08	8.31072e+06	7.77183e+08
115	6747100000	6521000000	6478300000	6582100000	83386000		7.86375e+08	7.60023e+08	7.55047e+08	9.71865e+06	7.67148e+08
116	6679600000	6421200000	6381100000	6494000000	93538000		7.78508e+08	7.48392e+08	7.43718e+08	1.09019e+07	7.56873e+08
117	6605100000	6321000000	6284000000	6403400000	101400000		7.69825e+08	7.36713e+08	7.32401e+08	1.18182e+07	7.46313e+08
118	6522600000	6219900000	6187200000	6309900000	106750000		7.6021e+08	7.2493e+08	7.21119e+08	1.24417e+07	7.3542e+08
119	6431800000	6117400000	6091100000	6213400000	109470000		7.49627e+08	7.12984e+08	7.09918e+08	1.27587e+07	7.24176e+08
120	6332500000	6013000000	5995100000	6113500000	109610000		7.38054e+08	7.00816e+08	6.9873e+08	1.27751e+07	7.12533e+08
121	6225300000	5907000000	5899500000	6010600000	107370000		7.25559e+08	6.88462e+08	6.87587e+08	1.2514e+07	7.00536e+08
122	6110800000	5799500000	5804100000	5904800000	102990000		7.12214e+08	6.75932e+08	6.76469e+08	1.20035e+07	6.88205e+08
123	5990300000	5691100000	5709100000	5796800000	96862000		6.9817e+08	6.63298e+08	6.65396e+08	1.12893e+07	6.75622e+08
124	5864900000	5581900000	5614000000	5686900000	89454000		6.83555e+08	6.50571e+08	6.54312e+08	1.04259e+07	6.62813e+08
125	5736100000	5472600000	5518900000	5575900000	81231000		6.68543e+08	6.37832e+08	6.43228e+08	9.46748e+06	6.49868e+08
126	5605700000	5363900000	5423800000	5464500000	72712000		6.53345e+08	6.25163e+08	6.32145e+08	8.47459e+06	6.36884e+08
127	5475100000	5256200000	5328900000	5353400000	64356000		6.38124e+08	6.12611e+08	6.21084e+08	7.5007e+06	6.23939e+08
128	5345900000	5150300000	5234400000	5243500000	56648000		6.23065e+08	6.00268e+08	6.1007e+08	6.60233e+06	6.11134e+08
129	5219300000	5046400000	5140400000	5135400000	49970000		6.0831e+08	5.88159e+08	5.99114e+08	5.82401e+06	5.98528e+08
130	5096400000	4944900000	5047200000	5029500000	44614000		5.93986e+08	5.76329e+08	5.88252e+08	5.19977e+06	5.86189e+08
131	4978400000	4846300000	4955200000	4926600000	40723000		5.80233e+08	5.64837e+08	5.77529e+08	4.74627e+06	5.742e+08
132	4865800000	4750700000	4864600000	4827100000	38164000		5.6711e+08	5.53695e+08	5.6697e+08	4.44802e+06	5.62591e+08
133	4759400000	4658500000	4776000000	4731300000	36697000		5.54709e+08	5.42949e+08	5.56643e+08	4.27704e+06	5.51434e+08
134	4659100000	4569500000	4689200000	4639200000	35957000		5.43019e+08	5.32576e+08	5.46527e+08	4.19079e+06	5.40707e+08
135	4565200000	4483800000	4604500000	4551200000	35543000		5.32075e+08	5.22587e+08	5.36655e+08	4.14254e+06	5.30439e+08
136	4477500000	4401500000	4522100000	4467000000	35212000		5.21853e+08	5.12995e+08	5.27051e+08	4.10396e+06	5.20633e+08
137	4395800000	4322500000	4441900000	4386800000	34770000		5.12331e+08	5.03788e+08	5.17704e+08	4.05245e+06	5.11274e+08
138	4319900000	4247000000	4364100000	4310300000	34154000		5.03485e+08	4.94988e+08	5.08636e+08	3.98065e+06	5.0237e+08
139	4249000000	4174600000	4288300000	4237300000	33340000		4.95221e+08	4.8655e+08	4.99802e+08	3.88578e+06	4.93858e+08
140	4182800000	4105300000	4214400000	4167500000	32394000		4.87506e+08	4.78473e+08	4.91189e+08	3.77552e+06	4.85723e+08
141	4120600000	4039200000	4142300000	4100700000	31391000		4.80256e+08	4.70769e+08	4.82786e+08	3.65862e+06	4.77937e+08
142	4062000000	3976000000	4071900000	4036600000	30437000		4.73427e+08	4.63403e+08	4.7458e+08	3.54744e+06	4.7047e+08
143	4006200000	3915700000	4002900000	3974900000	29632000		4.66923e+08	4.56375e+08	4.66538e+08	3.45361e+06	4.63279e+08
144	3952700000	3857900000	3935000000	3915200000	29085000		4.60688e+08	4.49639e+08	4.58625e+08	3.38986e+06	4.56317e+08
145	3901000000	3802700000	3868200000	3857300000	28894000		4.54662e+08	4.43205e+08	4.50839e+08	3.3676e+06	4.49569e+08
146	3850600000	3749800000	3802400000	3800900000	29111000		4.48788e+08	4.3704e+08	4.4317e+08	3.39289e+06	4.42999e+08
147	3801300000	3699200000	3737400000	3746000000	29784000		4.43042e+08	4.31142e+08	4.35594e+08	3.47133e+06	4.36593e+08
148	3752400000	3650400000	3673200000	3692000000	30936000		4.37343e+08	4.25455e+08	4.28112e+08	3.60559e+06	4.30303e+08
149	3703800000	3603200000	3609600000	3638900000	32531000		4.31678e+08	4.19953e+08	4.20699e+08	3.79149e+06	4.2411e+08
150	3655200000	3557400000	3546700000	3586400000	34519000		4.26014e+08	4.14615e+08	4.13368e+08	4.02319e+06	4.17999e+08
151	3606500000	3512900000	3484500000	3534600000	36839000		4.20338e+08	4.09429e+08	4.06119e+08	4.29359e+06	4.11962e+08
152	3557500000	3469500000	3423100000	3483300000	39398000		4.14627e+08	4.04371e+08	3.98963e+08	4.59184e+06	4.05987e+08
153	3507900000	3426700000	3362400000	3432300000	42096000		4.08846e+08	3.99382e+08	3.91888e+08	4.90629e+06	4.00039e+08
154	3457900000	3384500000	3302500000	3381700000	44883000		4.03019e+08	3.94464e+08	3.84907e+08	5.23112e+06	3.9413e+08
155	3407500000	3342800000	3243600000	3331300000	47660000		3.97145e+08	3.89604e+08	3.78042e+08	5.55478e+06	3.88263e+08
156	3356400000	3301400000	3185600000	3281100000	50344000		3.91189e+08	3.84779e+08	3.71282e+08	5.8676e+06	3.82416e+08
157	3305000000	3260400000	3128800000	3231400000	52883000		3.85198e+08	380000000	3.64662e+08	6.16352e+06	3.7662e+08
158	3253100000	3219400000	3073200000	3181900000	55219000		3.79149e+08	3.75221e+08	3.58182e+08	6.43578e+06	3.70851e+08
159	3200800000	3178500000	3018800000	3132700000	57299000		3.73054e+08	3.70455e+08	3.51841e+08	6.67821e+06	3.65117e+08
160	3148100000	3137700000	2965800000	3083900000	59095000		3.66911e+08	3.65699e+08	3.45664e+08	6.88753e+06	3.59425e+08
161	3095300000	3097000000	2914400000	3035600000	60591000		3.60758e+08	3.60956e+08	3.39674e+08	7.06189e+06	3.53796e+08
162	3042200000	3056500000	2864400000	2987700000	61775000		3.54569e+08	3.56235e+08	3.33846e+08	7.19988e+06	3.48217e+08
163	2989200000	3016000000	2816100000	2940400000	62653000		3.48392e+08	3.51515e+08	3.28217e+08	7.30221e+06	3.42708e+08
164	2936300000	2975700000	2769400000	2893800000	63237000		3.42226e+08	3.46818e+08	3.22774e+08	7.37028e+06	3.37273e+08
165	2883700000	2935700000	2724500000	2848000000	63529000		3.36096e+08	3.42156e+08	3.17541e+08	7.40431e+06	3.31931e+08
166	2831600000	2895900000	2681400000	2803000000	63564000		3.30023e+08	3.37517e+08	3.12517e+08	7.40839e+06	3.26686e+08
167	2780200000	2856300000	2640000000	2758800000	63355000		3.24033e+08	3.32902e+08	3.07692e+08	7.38403e+06	3.21542e+08
168	2729500000	2817100000	2600400000	2715700000	62921000		3.18124e+08	3.28333e+08	3.03077e+08	7.33345e+06	3.16511e+08
169	2679900000	2778000000	2562600000	2673500000	62266000		3.12343e+08	3.23776e+08	2.98671e+08	7.25711e+06	3.11597e+08
170	2631600000	2739300000	2526600000	2632500000	61417000		3.06713e+08	3.19266e+08	2.94476e+08	7.15816e+06	3.06818e+08
171	2584700000	2700900000	2492300000	2592600000	60353000		3.01247e+08	3.1479e+08	2.90478e+08	7.03415e+06	3.02172e+08
172	2539300000	2662600000	2459600000	2553800000	59062000		2.95956e+08	3.10326e+08	2.86667e+08	6.88368e+06	2.9765e+08
173	2495600000	2624600000	2428500000	2516200000	57532000		2.90862e+08	3.05897e+08	2.83042e+08	6.70536e+06	2.93267e+08
174	2453800000	2586700000	2399000000	2479800000	55742000		2.85991e+08	3.0148e+08	2.79604e+08	6.49674e+06	2.89025e+08
175	2413900000	2549000000	2370800000	2444600000	53654000		2.8134e+08	2.97086e+08	2.76317e+08	6.25338e+06	2.84915e+08
176	2376200000	2511300000	2344100000	2410600000	51229000		2.76946e+08	2.92692e+08	2.73205e+08	5.97075e+06	2.80948e+08
177	2340600000	2473700000	2318600000	2377600000	48451000		2.72797e+08	2.8831e+08	2.70233e+08	5.64697e+06	2.77113e+08
178	2307100000	2436000000	2294200000	2345800000	45286000		2.68893e+08	2.83916e+08	2.67389e+08	5.27809e+06	2.73399e+08
179	2275700000	2398400000	2270800000	2315000000	41725000		2.65233e+08	2.79534e+08	2.64662e+08	4.86305e+06	2.6981e+08
180	2246600000	2360800000	2248400000	2285300000	37749000		2.61841e+08	2.75152e+08	2.62051e+08	4.39965e+06	2.66348e+08
181	2219600000	2323100000	2226800000	2256500000	33368000		2.58695e+08	2.70758e+08	2.59534e+08	3.88904e+06	2.62995e+08
182	2194700000	2285500000	2206000000	2228700000	28580000		2.55793e+08	2.66375e+08	2.5711e+08	3.331e+06	2.59759e+08
183	2171800000	2247900000	2185700000	2201800000	23409000		2.53124e+08	2.61993e+08	2.54744e+08	2.72832e+06	2.5662e+08
184	2150800000	2210500000	2166000000	2175800000	17902000		2.50676e+08	2.57634e+08	2.52448e+08	2.08648e+06	2.53586e+08
185	2131800000	2173300000	2146800000	2150600000	12134000		2.48462e+08	2.53298e+08	2.5021e+08	1.41422e+06	2.50657e+08
186	2114400000	2136300000	2127800000	2126200000	6369900		2.46434e+08	2.48986e+08	2.47995e+08	742413	2.47805e+08
187	2098700000	2099700000	2109100000	2102500000	3322800		2.44604e+08	2.4472e+08	2.45816e+08	387273	2.45047e+08
188	2084400000	2063500000	2090500000	2079500000	8188200		2.42937e+08	2.40501e+08	2.43648e+08	954336	2.42362e+08
189	2071600000	2027800000	2072000000	2057100000	14647000		2.41445e+08	2.3634e+08	2.41492e+08	1.70711e+06	2.39759e+08
190	2060000000	1992900000	2053500000	2035500000	21350000		2.40093e+08	2.32273e+08	2.39336e+08	2.48834e+06	2.37234e+08
191	2049400000	1958800000	2034900000	2014300000	28114000		2.38858e+08	2.28298e+08	2.37168e+08	3.27669e+06	2.34775e+08
192	2039800000	1925400000	2016000000	1993800000	34843000		2.37739e+08	2.24406e+08	2.34965e+08	4.06096e+06	2.3237e+08
193	2030900000	1893100000	1997000000	1973700000	41473000		2.36702e+08	2.20641e+08	2.32751e+08	4.83368e+06	2.30031e+08
194	2022700000	1861800000	1977600000	1954000000	47929000		2.35746e+08	2.16993e+08	2.3049e+08	5.58613e+06	2.27743e+08
195	2014900000	1831600000	1957900000	1934800000	54164000		2.34837e+08	2.13473e+08	2.28193e+08	6.31282e+06	2.25501e+08
196	2007400000	1802600000	1937800000	1915900000	60125000		2.33963e+08	2.10093e+08	2.25851e+08	7.00758e+06	2.23302e+08
197	2000000000	1774800000	1917200000	1897300000	65765000		2.331e+08	2.06853e+08	2.2345e+08	7.66492e+06	2.21134e+08
198	1992600000	1748200000	1896100000	1879000000	71054000		2.32238e+08	2.03753e+08	2.20991e+08	8.28135e+06	2.18994e+08
199	1985000000	1722900000	1874600000	1860800000	75955000		2.31352e+08	2.00804e+08	2.18485e+08	8.85256e+06	2.1688e+08
200	1977000000	1698900000	1852600000	1842800000	80436000		2.3042e+08	1.98007e+08	2.15921e+08	9.37483e+06	2.14782e+08
201	1968600000	1676000000	1830100000	1824900000	84496000		2.29441e+08	1.95338e+08	2.13298e+08	9.84802e+06	2.12692e+08
202	1959600000	1654400000	1807100000	1807000000	88112000		2.28392e+08	1.92821e+08	2.10618e+08	1.02695e+07	2.1061e+08
203	1949900000	1633800000	1783700000	1789100000	91272000		2.27261e+08	1.9042e+08	2.0789e+08	1.06378e+07	2.08524e+08
204	1939400000	1614500000	1760000000	1771300000	93973000		2.26037e+08	1.8817e+08	2.05128e+08	1.09526e+07	2.06445e+08
205	1928000000	1596100000	1735900000	1753300000	96222000		2.24709e+08	1.86026e+08	2.02319e+08	1.12147e+07	2.04351e+08
206	1915700000	1578600000	1711500000	1735300000	98034000		2.23275e+08	1.83986e+08	1.99476e+08	1.14259e+07	2.02246e+08
207	1902400000	1562000000	1687000000	1717100000	99417000		2.21725e+08	1.82051e+08	1.9662e+08	1.15871e+07	2.00132e+08
208	1888100000	1546200000	1662300000	1698900000	100390000		2.20058e+08	1.8021e+08	1.93741e+08	1.17005e+07	1.98003e+08
209	1872900000	1531100000	1637700000	1680600000	100980000		2.18287e+08	1.7845e+08	1.90874e+08	1.17692e+07	1.9587e+08
210	1856700000	1516600000	1613000000	1662100000	101210000		2.16399e+08	1.7676e+08	1.87995e+08	1.1796e+07	1.93718e+08
211	1839500000	1502600000	1588600000	1643600000	101080000		2.14394e+08	1.75128e+08	1.85152e+08	1.17809e+07	1.91558e+08
212	1821500000	1489000000	1564400000	1624900000	100630000		2.12296e+08	1.73543e+08	1.82331e+08	1.17284e+07	1.8939e+08
213	1802500000	1475800000	1540400000	1606300000	99894000		2.10082e+08	1.72005e+08	1.79534e+08	1.16427e+07	1.87207e+08
214	1782900000	1463000000	1516900000	1587600000	98879000		2.07797e+08	1.70513e+08	1.76795e+08	1.15244e+07	1.85035e+08
215	1762400000	1450300000	1493800000	1568800000	97619000		2.05408e+08	1.69033e+08	1.74103e+08	1.13775e+07	1.82848e+08
216	1741400000	1437700000	1471200000	1550100000	96143000		2.0296e+08	1.67564e+08	1.71469e+08	1.12055e+07	1.80664e+08
217	1719900000	1425300000	1449100000	1531500000	94468000		2.00455e+08	1.66119e+08	1.68893e+08	1.10103e+07	1.78489e+08
218	1697900000	1413000000	1427700000	1512900000	92618000		1.9789e+08	1.64685e+08	1.66399e+08	1.07946e+07	1.76325e+08
219	1675500000	1400700000	1406800000	1494300000	90614000		1.9528e+08	1.63252e+08	1.63963e+08	1.05611e+07	1.74165e+08
220	1652900000	1388400000	1386600000	1475900000	88486000		1.92646e+08	1.61818e+08	1.61608e+08	1.03131e+07	1.72024e+08
221	1630100000	1376000000	1366900000	1457700000	86246000		1.89988e+08	1.60373e+08	1.59312e+08	1.0052e+07	1.69891e+08
222	1607100000	1363600000	1348000000	1439600000	83914000		1.87308e+08	1.58928e+08	1.5711e+08	9.78019e+06	1.67782e+08
223	1584200000	1351100000	1329600000	1421600000	81511000		1.84639e+08	1.57471e+08	1.54965e+08	9.50012e+06	1.65692e+08
224	1561200000	1338500000	1311800000	1403800000	79053000		1.81958e+08	1.56002e+08	1.5289e+08	9.21364e+06	1.63617e+08
225	1538300000	1325800000	1294500000	1386200000	76557000		1.79289e+08	1.54522e+08	1.50874e+08	8.92273e+06	1.61562e+08
226	1515400000	1313100000	1277800000	1368800000	74031000		1.7662e+08	1.53042e+08	1.48928e+08	8.62832e+06	1.5953e+08
227	1492700000	1300300000	1261500000	1351500000	71493000		1.73974e+08	1.5155e+08	1.47028e+08	8.33252e+06	1.57517e+08
228	1470300000	1287400000	1245700000	1334500000	68957000		1.71364e+08	1.50047e+08	1.45186e+08	8.03695e+06	1.55532e+08
229	1447900000	1274400000	1230200000	1317500000	66436000		1.68753e+08	1.48531e+08	1.4338e+08	7.74312e+06	1.53555e+08
230	1425800000	1261400000	1215100000	1300800000	63938000		1.66177e+08	1.47016e+08	1.4162e+08	7.45198e+06	1.51605e+08
231	1403900000	1248400000	1200200000	1284200000	61472000		1.63625e+08	1.45501e+08	1.39883e+08	7.16457e+06	1.4967e+08
232	1382200000	1235300000	1185500000	1267700000	59049000		1.61096e+08	1.43974e+08	1.3817e+08	6.88217e+06	1.47747e+08
233	1360800000	1222300000	1171000000	1251300000	56678000		1.58601e+08	1.42459e+08	1.3648e+08	6.60583e+06	1.45847e+08
234	1339500000	1209200000	1156600000	1235100000	54366000		1.56119e+08	1.40932e+08	1.34802e+08	6.33636e+06	1.43951e+08
235	1318500000	1196100000	1142300000	1219000000	52122000		1.53671e+08	1.39406e+08	1.33135e+08	6.07483e+06	1.42071e+08
236	1297600000	1183100000	1128000000	1202900000	49954000		1.51235e+08	1.3789e+08	1.31469e+08	5.82214e+06	1.40198e+08
237	1277000000	1170100000	1113800000	1187000000	47867000		1.48834e+08	1.36375e+08	1.29814e+08	5.5789e+06	1.38341e+08
238	1256600000	1157100000	1099500000	1171100000	45867000		1.46457e+08	1.3486e+08	1.28147e+08	5.3458e+06	1.36488e+08
239	1236300000	1144200000	1085200000	1155200000	43967000		1.44091e+08	1.33357e+08	1.2648e+08	5.12436e+06	1.34643e+08
240	1216200000	1131300000	1070800000	1139400000	42170000		1.41748e+08	1.31853e+08	1.24802e+08	4.91492e+06	1.32801e+08
241	1196300000	1118400000	1056400000	1123700000	40477000		1.39429e+08	1.3035e+08	1.23124e+08	4.7176e+06	1.30967e+08
242	1176600000	1105700000	1041900000	1108100000	38909000		1.37133e+08	1.28869e+08	1.21434e+08	4.53485e+06	1.29145e+08
243	1157100000	1093000000	1027300000	1092400000	37466000		1.3486e+08	1.27389e+08	1.19732e+08	4.36667e+06	1.27327e+08
244	1137700000	1080300000	1012600000	1076900000	36150000		1.32599e+08	1.25909e+08	1.18019e+08	4.21329e+06	1.25509e+08
245	1118500000	1067700000	997890000	1061400000	34972000		1.30361e+08	1.24441e+08	1.16304e+08	4.07599e+06	1.23702e+08
246	1099600000	1055200000	983120000	1045900000	33932000		1.28159e+08	1.22984e+08	1.14583e+08	3.95478e+06	1.21908e+08
247	1080800000	1042700000	968350000	1030600000	33024000		1.25967e+08	1.21527e+08	1.12861e+08	3.84895e+06	1.20118e+08
248	1062300000	1030200000	953560000	1015400000	32253000		1.23811e+08	1.2007e+08	1.11138e+08	3.75909e+06	1.1834e+08
249	1044000000	1017800000	938800000	1000200000	31611000		1.21678e+08	1.18625e+08	1.09417e+08	3.68427e+06	1.16573e+08
250	1025900000	1005400000	924100000	985140000	31090000		1.19569e+08	1.17179e+08	1.07704e+08	3.62354e+06	1.14817e+08
251	1008100000	993110000	909470000	970220000	30683000		1.17494e+08	1.15747e+08	1.05999e+08	3.57611e+06	1.1308e+08
252	990580000	980820000	894990000	955460000	30366000		1.15452e+08	1.14315e+08	1.04311e+08	3.53916e+06	1.11359e+08
253	973330000	968540000	880630000	940840000	30132000		1.13442e+08	1.12883e+08	1.02638e+08	3.51189e+06	1.09654e+08
254	956400000	956290000	866460000	926380000	29961000		1.11469e+08	1.11456e+08	1.00986e+08	3.49196e+06	1.0797e+08
255	939760000	944090000	852510000	912120000	29830000		1.09529e+08	1.10034e+08	9.93601e+07	3.47669e+06	1.06308e+08
256	923470000	931920000	838810000	898070000	29728000		1.07631e+08	1.08615e+08	9.77634e+07	3.4648e+06	1.0467e+08
257	907480000	919770000	825360000	884210000	29635000		1.05767e+08	1.07199e+08	9.61958e+07	3.45396e+06	1.03054e+08
258	891850000	907670000	812210000	870570000	29537000		1.03945e+08	1.05789e+08	9.46632e+07	3.44254e+06	1.01466e+08
259	876550000	895590000	799370000	857170000	29418000		1.02162e+08	1.04381e+08	9.31667e+07	3.42867e+06	9.99033e+07
260	861620000	883570000	786880000	844020000	29265000		1.00422e+08	1.0298e+08	9.1711e+07	3.41084e+06	9.8371e+07
261	847060000	871610000	774760000	831140000	29068000		9.87249e+07	1.01586e+08	9.02984e+07	3.38788e+06	9.68699e+07
262	832830000	859690000	763000000	818510000	28817000		9.70664e+07	1.00197e+08	8.89277e+07	3.35862e+06	9.5397e+07
263	818960000	847840000	751620000	806140000	28504000		9.54499e+07	9.88159e+07	8.76014e+07	3.32214e+06	9.39557e+07
264	805440000	836050000	740650000	794050000	28124000		9.38741e+07	9.74417e+07	8.63228e+07	3.27786e+06	9.25462e+07
265	792280000	824350000	730070000	782230000	27679000		9.23403e+07	9.60781e+07	8.50897e+07	3.22599e+06	9.11694e+07
266	779470000	812760000	719890000	770710000	27166000		9.08473e+07	9.47273e+07	8.39033e+07	3.1662e+06	8.9826e+07
267	766970000	801260000	710110000	759450000	26582000		8.93904e+07	9.33869e+07	8.27634e+07	3.09814e+06	8.85136e+07
268	754810000	789880000	700700000	748460000	25937000		8.79732e+07	9.20606e+07	8.16667e+07	3.02296e+06	8.72335e+07
269	742970000	778600000	691690000	737760000	25224000		8.65932e+07	9.07459e+07	8.06166e+07	2.93986e+06	8.59852e+07
270	731420000	767460000	683070000	727320000	24447000		8.52471e+07	8.94476e+07	7.96119e+07	2.8493e+06	8.47688e+07
271	720210000	756450000	674820000	717160000	23614000		8.39406e+07	8.81643e+07	7.86503e+07	2.75221e+06	8.35851e+07
272	709270000	745580000	666920000	707260000	22728000		8.26655e+07	8.68974e+07	7.77296e+07	2.64895e+06	8.24308e+07
273	698600000	734860000	659360000	697600000	21801000		8.14219e+07	8.5648e+07	7.68485e+07	2.54091e+06	8.13061e+07
274	688200000	724290000	652110000	688200000	20836000		8.02098e+07	8.44161e+07	7.60035e+07	2.42844e+06	8.02098e+07
275	678070000	713900000	645180000	679050000	19844000		7.90291e+07	8.32051e+07	7.51958e+07	2.31282e+06	7.91434e+07
276	668180000	703660000	638520000	670120000	18829000		7.78765e+07	8.20117e+07	7.44196e+07	2.19452e+06	7.81026e+07
277	658520000	693600000	632120000	661410000	17806000		7.67506e+07	8.08392e+07	7.36737e+07	2.07529e+06	7.70878e+07
278	649080000	683710000	625980000	652920000	16777000		7.56503e+07	7.96865e+07	7.2958e+07	1.95536e+06	7.60983e+07
279	639870000	673990000	620050000	644640000	15752000		7.45769e+07	7.85536e+07	7.22669e+07	1.8359e+06	7.51325e+07
280	630880000	664450000	614340000	636560000	14743000		7.35291e+07	7.74417e+07	7.16014e+07	1.7183e+06	7.41908e+07
281	622080000	655080000	608800000	628650000	13759000		7.25035e+07	7.63497e+07	7.09557e+07	1.60361e+06	7.32696e+07
282	613480000	645890000	603430000	620930000	12812000		7.15012e+07	7.52786e+07	7.03298e+07	1.49324e+06	7.23699e+07
283	605060000	636880000	598200000	613380000	11916000		7.05198e+07	7.42284e+07	6.97203e+07	1.38881e+06	7.14895e+07
284	596800000	628040000	593100000	605980000	11081000		6.95571e+07	7.31981e+07	6.91259e+07	1.29149e+06	7.0627e+07
285	588760000	619380000	588120000	598750000	10313000		6.862e+07	7.21888e+07	6.85455e+07	1.20198e+06	6.97848e+07
286	580890000	610870000	583230000	591660000	9626400		6.77028e+07	7.1197e+07	6.79755e+07	1.12196e+06	6.89584e+07
287	573190000	602530000	578430000	584720000	9035500		6.68054e+07	7.02249e+07	6.74161e+07	1.05309e+06	6.81488e+07
288	565650000	594350000	573680000	577890000	8548100		6.59266e+07	6.92716e+07	6.68625e+07	996282	6.73535e+07
289	558280000	586330000	568980000	571200000	8173900		6.50676e+07	6.83368e+07	6.63147e+07	952669	6.6573e+07
290	551090000	578470000	564330000	564630000	7907400		6.42296e+07	6.74207e+07	6.57727e+07	921608	6.58077e+07
291	544050000	570740000	559710000	558170000	7745600		6.34091e+07	6.65198e+07	6.52343e+07	902751	6.50544e+07
292	537170000	563160000	555100000	551810000	7681800		6.26072e+07	6.56364e+07	6.4697e+07	895315	6.43135e+07
293	530470000	555720000	550510000	545570000	7697200		6.18263e+07	6.47692e+07	6.4162e+07	897110	6.35859e+07
294	523930000	548420000	545950000	539430000	7783900		6.10641e+07	6.39184e+07	6.36305e+07	907214	6.2871e+07
295	517550000	541250000	541370000	533390000	7921300		6.03205e+07	6.30828e+07	6.30967e+07	923228	6.21667e+07
296	511330000	534190000	536800000	527440000	8092700		5.95956e+07	6.22599e+07	6.25641e+07	943205	6.14732e+07
297	505260000	527260000	532220000	521580000	8284400		5.88881e+07	6.14522e+07	6.20303e+07	965548	6.07902e+07
298	499360000	520440000	527630000	515810000	8482400		5.82005e+07	6.06573e+07	6.14953e+07	988625	6.01177e+07
299	493640000	513740000	523050000	510140000	8679000		5.75338e+07	5.98765e+07	6.09615e+07	1.01154e+06	5.94573e+07
300	488060000	507130000	518450000	504550000	8866900		5.68834e+07	5.91061e+07	6.04254e+07	1.03344e+06	5.8805e+07
301	482640000	500630000	513840000	499030000	9041000		5.62517e+07	5.83485e+07	5.98881e+07	1.05373e+06	5.81628e+07
302	477380000	494220000	509220000	493610000	9196700		5.56387e+07	5.76014e+07	5.93497e+07	1.07188e+06	5.75299e+07
303	472280000	487920000	504600000	488270000	9330500		5.50443e+07	5.68671e+07	5.88112e+07	1.08747e+06	5.69075e+07
304	467340000	481710000	499980000	483010000	9445300		5.44685e+07	5.61434e+07	5.82727e+07	1.10085e+06	5.62949e+07
305	462530000	475590000	495360000	477820000	9543000		5.39079e+07	5.54301e+07	5.77343e+07	1.11224e+06	5.56908e+07
306	457880000	469540000	490730000	472720000	9613700		5.3366e+07	5.47249e+07	5.71946e+07	1.12048e+06	5.50952e+07
307	453360000	463580000	486100000	467680000	9670400		5.28392e+07	5.40303e+07	5.6655e+07	1.12709e+06	5.45082e+07
308	448990000	457700000	481490000	462730000	9711100		5.23298e+07	5.3345e+07	5.61177e+07	1.13183e+06	5.39308e+07
309	444760000	451910000	476880000	457850000	9737900		5.18368e+07	5.26702e+07	5.55804e+07	1.13495e+06	5.33625e+07
310	440640000	446190000	472280000	453040000	9752000		5.13566e+07	5.20035e+07	5.50443e+07	1.1366e+06	5.28015e+07
311	436650000	440540000	467690000	448290000	9763700		5.08916e+07	5.1345e+07	5.45093e+07	1.13796e+06	5.22486e+07
312	432780000	434970000	463110000	443620000	9768400		5.04406e+07	5.06958e+07	5.39755e+07	1.13851e+06	5.1704e+07
313	429020000	429470000	458560000	439020000	9774000		5.00023e+07	5.00548e+07	5.34452e+07	1.13916e+06	5.11674e+07
314	425350000	424030000	454020000	434460000	9782800		4.95746e+07	4.94207e+07	5.29161e+07	1.14019e+06	5.06371e+07
315	421780000	418670000	449490000	429980000	9795400		4.91585e+07	4.8796e+07	5.23881e+07	1.14166e+06	5.01142e+07
316	418300000	413380000	444980000	425550000	9816700		4.87529e+07	4.81795e+07	5.18625e+07	1.14414e+06	4.95983e+07
317	414890000	408170000	440480000	421180000	9845500		4.83555e+07	4.75723e+07	5.1338e+07	1.14749e+06	4.90886e+07
318	411570000	403020000	436020000	416870000	9886700		4.79685e+07	4.6972e+07	5.08182e+07	1.1523e+06	4.85862e+07
319	408300000	397940000	431560000	412600000	9940700		4.75874e+07	4.638e+07	5.02984e+07	1.15859e+06	4.80886e+07
320	405090000	392930000	427120000	408380000	10007000		4.72133e+07	4.5796e+07	4.97809e+07	1.16632e+06	4.75967e+07
321	401930000	387990000	422690000	404210000	10082000		4.6845e+07	4.52203e+07	4.92646e+07	1.17506e+06	4.71099e+07
322	398830000	383120000	418280000	400080000	10170000		4.64837e+07	4.46527e+07	4.87506e+07	1.18531e+06	4.6629e+07
323	395760000	378330000	413890000	395990000	10265000		4.61259e+07	4.40944e+07	4.82389e+07	1.19639e+06	4.61531e+07
324	392710000	373600000	409490000	391940000	10368000		4.57704e+07	4.35431e+07	4.77261e+07	1.20839e+06	4.56799e+07
325	389690000	368950000	405110000	387920000	10475000		4.54184e+07	4.30012e+07	4.72156e+07	1.22086e+06	4.52117e+07
326	386690000	364370000	400730000	383930000	10586000		4.50688e+07	4.24674e+07	4.67051e+07	1.2338e+06	4.47471e+07
327	383700000	359860000	396360000	379970000	10700000		4.47203e+07	4.19417e+07	4.61958e+07	1.24709e+06	4.42859e+07
328	380720000	355430000	392000000	376050000	10810000		4.4373e+07	4.14254e+07	4.56876e+07	1.25991e+06	4.38287e+07
329	377740000	351070000	387630000	372150000	10918000		4.40256e+07	4.09172e+07	4.51783e+07	1.27249e+06	4.33737e+07
330	374760000	346790000	383250000	368270000	11017000		4.36783e+07	4.04184e+07	4.46678e+07	1.28403e+06	4.29215e+07
331	371780000	342570000	378880000	364410000	11110000		4.3331e+07	3.99266e+07	4.41585e+07	1.29487e+06	4.2472e+07
332	368790000	338440000	374500000	360580000	11191000		4.29825e+07	3.94452e+07	4.3648e+07	1.30431e+06	4.20253e+07
333	365780000	334370000	370110000	356750000	11263000		4.26317e+07	3.89709e+07	4.31364e+07	1.3127e+06	4.15796e+07
334	362770000	330370000	365720000	352950000	11322000		4.22809e+07	3.85047e+07	4.26247e+07	1.31958e+06	4.11368e+07
335	359730000	326450000	361320000	349170000	11368000		4.19266e+07	3.80478e+07	4.21119e+07	1.32494e+06	4.06954e+07
336	356680000	322600000	356910000	345400000	11399000		4.15711e+07	3.75991e+07	4.15979e+07	1.32855e+06	4.0256e+07
337	353620000	318830000	352510000	341650000	11416000		4.12145e+07	3.71597e+07	4.10851e+07	1.33054e+06	3.98197e+07
338	350540000	315120000	348090000	337920000	11419000		4.08555e+07	3.67273e+07	4.05699e+07	1.33089e+06	3.93842e+07
339	347440000	311480000	343680000	334200000	11409000		4.04942e+07	3.6303e+07	4.00559e+07	1.32972e+06	3.8951e+07
340	344320000	307910000	339260000	330500000	11387000		4.01305e+07	3.58869e+07	3.95408e+07	1.32716e+06	3.85194e+07
341	341180000	304400000	334850000	326810000	11353000		3.97646e+07	3.54779e+07	3.90268e+07	1.32319e+06	3.80897e+07
342	338040000	300970000	330440000	323150000	11307000		3.93986e+07	3.50781e+07	3.85128e+07	1.31783e+06	3.76632e+07
343	334880000	297590000	326040000	319500000	11252000		3.90303e+07	3.46841e+07	38000000	1.31142e+06	3.72382e+07
344	331710000	294270000	321650000	315880000	11189000		3.86608e+07	3.42972e+07	3.74883e+07	1.30408e+06	3.68155e+07
345	328530000	291010000	317270000	312270000	11118000		3.82902e+07	3.39172e+07	3.69779e+07	1.2958e+06	3.63951e+07
346	325350000	287810000	312920000	308690000	11039000		3.79196e+07	3.35443e+07	3.64709e+07	1.2866e+06	3.59782e+07
347	322160000	284670000	308600000	305140000	10960000		3.75478e+07	3.31783e+07	3.59674e+07	1.27739e+06	3.55645e+07
348	318980000	281580000	304290000	301620000	10879000		3.71772e+07	3.28182e+07	3.5465e+07	1.26795e+06	3.51535e+07
349	315790000	278530000	300020000	298120000	10798000		3.68054e+07	3.24627e+07	3.49674e+07	1.25851e+06	3.47451e+07
350	312610000	275540000	295790000	294650000	10717000		3.64347e+07	3.21142e+07	3.44744e+07	1.24907e+06	3.43411e+07
351	309450000	272600000	291600000	291220000	10638000		3.60664e+07	3.17716e+07	3.3986e+07	1.23986e+06	3.39413e+07
352	306290000	269710000	287450000	287820000	10563000		3.56981e+07	3.14347e+07	3.35023e+07	1.23112e+06	3.35451e+07
353	303150000	266860000	283360000	284460000	10492000		3.53322e+07	3.11026e+07	3.30256e+07	1.22284e+06	3.31535e+07
354	300030000	264050000	279320000	281130000	10426000		3.49685e+07	3.07751e+07	3.25548e+07	1.21515e+06	3.27661e+07
355	296930000	261280000	275330000	277850000	10370000		3.46072e+07	3.04522e+07	3.20897e+07	1.20862e+06	3.23831e+07
356	293860000	258550000	271420000	274610000	10319000		3.42494e+07	3.0134e+07	3.1634e+07	1.20268e+06	3.20058e+07
357	290820000	255860000	267570000	271420000	10275000		3.38951e+07	2.98205e+07	3.11853e+07	1.19755e+06	3.16336e+07
358	287810000	253200000	263780000	268260000	10239000		3.35443e+07	2.95105e+07	3.07436e+07	1.19336e+06	3.12661e+07
359	284830000	250570000	260070000	265160000	10211000		3.3197e+07	2.9204e+07	3.03112e+07	1.19009e+06	3.0904e+07
360	281890000	247990000	256450000	262110000	10188000		3.28543e+07	2.89033e+07	2.98893e+07	1.18741e+06	3.0549e+07
361	278990000	245430000	252900000	259110000	10173000		3.25163e+07	2.86049e+07	2.94755e+07	1.18566e+06	3.01989e+07
362	276120000	242910000	249430000	256150000	10161000		3.21818e+07	2.83112e+07	2.90711e+07	1.18427e+06	2.98547e+07
363	273300000	240410000	246050000	253250000	10156000		3.18531e+07	2.80198e+07	2.86772e+07	1.18368e+06	2.95167e+07
364	270530000	237940000	242750000	250410000	10158000		3.15303e+07	2.77319e+07	2.82925e+07	1.18392e+06	2.91849e+07
365	267800000	235510000	239530000	247610000	10160000		3.12121e+07	2.74487e+07	2.79172e+07	1.18415e+06	2.88594e+07
366	265120000	233110000	236400000	244880000	10166000		3.08998e+07	2.7169e+07	2.75524e+07	1.18485e+06	2.85404e+07
367	262480000	230730000	233360000	242190000	10175000		3.05921e+07	2.68916e+07	2.71981e+07	1.1859e+06	2.82273e+07
368	259900000	228380000	230410000	239560000	10185000		3.02914e+07	2.66177e+07	2.68543e+07	1.18706e+06	2.79211e+07
369	257360000	226060000	227550000	236990000	10195000		2.99953e+07	2.63473e+07	2.6521e+07	1.18823e+06	2.76212e+07
370	254880000	223760000	224780000	234470000	10205000		2.97063e+07	2.60793e+07	2.61981e+07	1.18939e+06	2.73279e+07
371	252440000	221490000	222100000	232010000	10216000		2.94219e+07	2.58147e+07	2.58858e+07	1.19068e+06	2.70408e+07
372	250040000	219250000	219500000	229600000	10224000		2.91422e+07	2.55536e+07	2.55828e+07	1.19161e+06	2.67595e+07
373	247700000	217030000	216990000	227240000	10231000		2.88695e+07	2.52949e+07	2.52902e+07	1.19242e+06	2.64848e+07
374	245400000	214840000	214560000	224940000	10235000		2.86014e+07	2.50396e+07	2.5007e+07	1.19289e+06	2.6216e+07
375	243150000	212680000	212220000	222690000	10236000		2.83392e+07	2.47879e+07	2.47343e+07	1.19301e+06	2.59538e+07
376	240950000	210540000	209960000	220480000	10233000		2.80828e+07	2.45385e+07	2.44709e+07	1.19266e+06	2.56974e+07
377	238780000	208430000	207780000	218330000	10227000		2.78298e+07	2.42925e+07	2.42168e+07	1.19196e+06	2.54464e+07
378	236650000	206340000	205670000	216220000	10218000		2.75816e+07	2.4049e+07	2.39709e+07	1.19091e+06	2.52005e+07
379	234570000	204270000	203640000	214160000	10205000		2.73392e+07	2.38077e+07	2.37343e+07	1.18939e+06	2.49604e+07
380	232520000	202230000	201690000	212150000	10188000		2.71002e+07	2.35699e+07	2.3507e+07	1.18741e+06	2.47257e+07
381	230510000	200220000	199810000	210180000	10166000		2.6866e+07	2.33357e+07	2.32879e+07	1.18485e+06	2.44965e+07
382	228530000	198230000	197990000	208250000	10140000		2.66352e+07	2.31037e+07	2.30758e+07	1.18182e+06	2.42716e+07
383	226580000	196260000	196240000	206360000	10110000		2.64079e+07	2.28741e+07	2.28718e+07	1.17832e+06	2.40513e+07
384	224660000	194320000	194550000	204510000	10076000		2.61841e+07	2.2648e+07	2.26748e+07	1.17436e+06	2.38357e+07
385	222770000	192400000	192930000	202700000	10036000		2.59639e+07	2.24242e+07	2.2486e+07	1.1697e+06	2.36247e+07
386	220900000	190500000	191360000	200920000	9992500		2.57459e+07	2.22028e+07	2.2303e+07	1.16463e+06	2.34172e+07
387	219060000	188620000	189860000	199180000	9944800		2.55315e+07	2.19837e+07	2.21282e+07	1.15907e+06	2.32145e+07
388	217230000	186770000	188400000	197470000	9892400		2.53182e+07	2.17681e+07	2.1958e+07	1.15296e+06	2.30148e+07
389	215420000	184940000	187000000	195790000	9834900		2.51072e+07	2.15548e+07	2.17949e+07	1.14626e+06	2.2819e+07
390	213630000	183130000	185650000	194140000	9772100		2.48986e+07	2.13438e+07	2.16375e+07	1.13894e+06	2.26267e+07
391	211850000	181340000	184340000	192510000	9707200		2.46911e+07	2.11352e+07	2.14848e+07	1.13138e+06	2.24371e+07
392	210080000	179570000	183080000	190910000	9637700		2.44848e+07	2.09289e+07	2.1338e+07	1.12328e+06	2.22506e+07
393	208320000	177820000	181860000	189330000	9565100		2.42797e+07	2.07249e+07	2.11958e+07	1.11481e+06	2.20668e+07
394	206570000	176100000	180680000	187780000	9487500		2.40758e+07	2.05245e+07	2.10583e+07	1.10577e+06	2.18862e+07
395	204820000	174390000	179540000	186250000	9404600		2.38718e+07	2.03252e+07	2.09254e+07	1.09611e+06	2.17075e+07
396	203080000	172700000	178430000	184740000	9319900		2.3669e+07	2.01282e+07	2.0796e+07	1.08624e+06	2.15311e+07
397	201350000	171030000	177360000	183250000	9234100		2.34674e+07	1.99336e+07	2.06713e+07	1.07624e+06	2.13574e+07
398	199620000	169380000	176320000	181770000	9143800		2.32657e+07	1.97413e+07	2.05501e+07	1.06571e+06	2.11857e+07
399	197890000	167750000	175310000	180320000	9051800		2.30641e+07	1.95513e+07	2.04324e+07	1.05499e+06	2.10159e+07
400	196150000	166140000	174330000	178870000	8957900		2.28613e+07	1.93636e+07	2.03182e+07	1.04404e+06	2.08477e+07
401	194420000	164540000	173370000	177440000	8862900		2.26597e+07	1.91772e+07	2.02063e+07	1.03297e+06	2.0681e+07
402	192680000	162960000	172440000	176030000	8765400		2.24569e+07	1.8993e+07	2.00979e+07	1.02161e+06	2.05159e+07
403	190950000	161410000	171520000	174620000	8667600		2.22552e+07	1.88124e+07	1.99907e+07	1.01021e+06	2.03528e+07
404	189210000	159870000	170630000	173240000	8569600		2.20524e+07	1.86329e+07	1.98869e+07	998788	2.01908e+07
405	187460000	158340000	169760000	171850000	8472300		2.18485e+07	1.84545e+07	1.97855e+07	987448	2.00295e+07
406	185710000	156830000	168900000	170480000	8373300		2.16445e+07	1.82786e+07	1.96853e+07	975909	1.98695e+07
407	183960000	155350000	168050000	169120000	8277400		2.14406e+07	1.81061e+07	1.95862e+07	964732	1.9711e+07
408	182200000	153880000	167220000	167770000	8182500		2.12354e+07	1.79347e+07	1.94895e+07	953671	1.95532e+07
409	180440000	152420000	166400000	166420000	8089500		2.10303e+07	1.77646e+07	1.93939e+07	942832	1.93963e+07
410	178680000	150990000	165590000	165080000	7998300		2.08252e+07	1.75979e+07	1.92995e+07	932203	1.92409e+07
411	176910000	149560000	164780000	163750000	7910700		2.06189e+07	1.74312e+07	1.92051e+07	921993	1.90851e+07
412	175130000	148160000	163980000	162430000	7825000		2.04114e+07	1.72681e+07	1.91119e+07	912005	1.89305e+07
413	173360000	146780000	163190000	161110000	7743600		2.02051e+07	1.71072e+07	1.90198e+07	902517	1.87774e+07
414	171580000	145410000	162400000	159800000	7666800		1.99977e+07	1.69476e+07	1.89277e+07	893566	1.86243e+07
415	169800000	144060000	161610000	158490000	7593100		1.97902e+07	1.67902e+07	1.88357e+07	884977	1.8472e+07
416	168020000	142730000	160820000	157190000	7522400		1.95828e+07	1.66352e+07	1.87436e+07	876737	1.83205e+07
417	166230000	141410000	160030000	155890000	7456500		1.93741e+07	1.64814e+07	1.86515e+07	869056	1.8169e+07
418	164440000	140120000	159230000	154600000	7395100		1.91655e+07	1.6331e+07	1.85583e+07	861900	1.80183e+07
419	162660000	138840000	158440000	153310000	7338100		1.8958e+07	1.61818e+07	1.84662e+07	855256	1.78687e+07
420	160870000	137580000	157630000	152020000	7284100		1.87494e+07	1.6035e+07	1.83718e+07	848963	1.77187e+07
421	159080000	136330000	156820000	150740000	7234200		1.85408e+07	1.58893e+07	1.82774e+07	843147	1.75692e+07
422	157290000	135110000	156000000	149460000	7188300		1.83322e+07	1.57471e+07	1.81818e+07	837797	1.74204e+07
423	155510000	133900000	155170000	148190000	7146600		1.81247e+07	1.56061e+07	1.80851e+07	832937	1.7272e+07
424	153730000	132710000	154330000	146920000	7108400		1.79172e+07	1.54674e+07	1.79872e+07	828485	1.71239e+07
425	151950000	131530000	153470000	145650000	7072100		1.77098e+07	1.53298e+07	1.78869e+07	824254	1.69755e+07
426	150170000	130380000	152610000	144390000	7039500		1.75023e+07	1.51958e+07	1.77867e+07	820455	1.68283e+07
427	148410000	129240000	151730000	143130000	7009600		1.72972e+07	1.50629e+07	1.76841e+07	816970	1.66814e+07
428	146650000	128120000	150840000	141870000	6981000		1.70921e+07	1.49324e+07	1.75804e+07	813636	1.6535e+07
429	144890000	127010000	149930000	140610000	6955100		1.68869e+07	1.4803e+07	1.74744e+07	810618	1.63881e+07
430	143150000	125910000	149000000	139360000	6929700		1.66841e+07	1.46748e+07	1.7366e+07	807657	1.62416e+07
431	141400000	124840000	148060000	138100000	6905800		1.64802e+07	1.45501e+07	1.72564e+07	804872	1.60956e+07
432	139680000	123780000	147110000	136850000	6881700		1.62797e+07	1.44266e+07	1.71457e+07	802063	1.59507e+07
433	137950000	122730000	146140000	135610000	6858700		1.60781e+07	1.43042e+07	1.70326e+07	799382	1.5805e+07
434	136240000	121700000	145150000	134360000	6834500		1.58788e+07	1.41841e+07	1.69172e+07	796562	1.56601e+07
435	134540000	120680000	144140000	133120000	6809800		1.56807e+07	1.40653e+07	1.67995e+07	793683	1.55152e+07
436	132850000	119680000	143120000	131880000	6784500		1.54837e+07	1.39487e+07	1.66807e+07	790734	1.5371e+07
437	131180000	118690000	142080000	130650000	6757600		1.5289e+07	1.38333e+07	1.65594e+07	787599	1.52273e+07
438	129510000	117710000	141020000	129410000	6729700		1.50944e+07	1.37191e+07	1.64359e+07	784347	1.50831e+07
439	127860000	116740000	139940000	128180000	6700000		1.49021e+07	1.36061e+07	1.631e+07	780886	1.49394e+07
440	126220000	115780000	138850000	126950000	6669400		1.4711e+07	1.34942e+07	1.6183e+07	777319	1.4796e+07
441	124590000	114830000	137730000	125720000	6635800		1.4521e+07	1.33834e+07	1.60524e+07	773403	1.46523e+07
442	122980000	113890000	136610000	124490000	6601400		1.43333e+07	1.32739e+07	1.59219e+07	769394	1.45097e+07
443	121390000	112960000	135470000	123270000	6565600		1.4148e+07	1.31655e+07	1.5789e+07	765221	1.43675e+07
444	119810000	112030000	134310000	122050000	6527100		1.39639e+07	1.30571e+07	1.56538e+07	760734	1.42249e+07
445	118250000	111120000	133140000	120830000	6487300		1.37821e+07	1.2951e+07	1.55175e+07	756096	1.40835e+07
446	116710000	110210000	131950000	119620000	6445000		1.36026e+07	1.2845e+07	1.53788e+07	751166	1.39421e+07
447	115180000	109300000	130760000	118410000	6400600		1.34242e+07	1.27389e+07	1.52401e+07	745991	1.38011e+07
448	113670000	108400000	129550000	117210000	6355300		1.32483e+07	1.2634e+07	1.50991e+07	740711	1.36605e+07
449	112180000	107500000	128320000	116000000	6307300		1.30746e+07	1.25291e+07	1.49557e+07	735117	1.35198e+07
450	110700000	106610000	127090000	114800000	6258400		1.29021e+07	1.24254e+07	1.48124e+07	729417	1.338e+07
451	109250000	105720000	125860000	113610000	6207500		1.27331e+07	1.23217e+07	1.4669e+07	723485	1.32413e+07
452	107810000	104830000	124610000	112420000	6155400		1.25653e+07	1.22179e+07	1.45233e+07	717413	1.31022e+07
453	106400000	103940000	123350000	111230000	6102100		1.24009e+07	1.21142e+07	1.43765e+07	711200	1.29639e+07
454	105000000	103060000	122090000	110050000	6047400		1.22378e+07	1.20117e+07	1.42296e+07	704825	1.28263e+07
455	103620000	102170000	120820000	108870000	5990700		1.20769e+07	1.19079e+07	1.40816e+07	698217	1.26888e+07
456	102270000	101280000	119560000	107700000	5933900		1.19196e+07	1.18042e+07	1.39347e+07	691597	1.25528e+07
457	100930000	100400000	118290000	106540000	5876500		1.17634e+07	1.17016e+07	1.37867e+07	684907	1.24172e+07
458	99611000	99510000	117010000	105380000	5816900		1.16097e+07	1.15979e+07	1.36375e+07	677960	1.22817e+07
459	98315000	98620000	115740000	104220000	5758000		1.14586e+07	1.14942e+07	1.34895e+07	671096	1.21474e+07
460	97039000	97730000	114470000	103080000	5697400		1.13099e+07	1.13904e+07	1.33415e+07	664033	1.20139e+07
461	95785000	96837000	113200000	101940000	5637300		1.11638e+07	1.12864e+07	1.31935e+07	657028	1.18812e+07
462	94551000	95942000	111930000	100810000	5576700		1.10199e+07	1.11821e+07	1.30455e+07	649965	1.17491e+07
463	93338000	95042000	110670000	99685000	5516300		1.08786e+07	1.10772e+07	1.28986e+07	642925	1.16181e+07
464	92145000	94141000	109420000	98568000	5455500		1.07395e+07	1.09721e+07	1.27529e+07	635839	1.14882e+07
465	90975000	93240000	108170000	97462000	5394000		1.06031e+07	1.08671e+07	1.26072e+07	628671	1.13592e+07
466	89824000	92334000	106930000	96362000	5332600		1.0469e+07	1.07615e+07	1.24627e+07	621515	1.12311e+07
467	88694000	91427000	105700000	95272000	5271300		1.03373e+07	1.06558e+07	1.23193e+07	614371	1.11042e+07
468	87586000	90519000	104470000	94193000	5209700		1.02082e+07	10550000	1.2176e+07	607191	1.0978e+07
469	86495000	89608000	103260000	93121000	5148800		1.0081e+07	1.04438e+07	1.2035e+07	600093	1.08533e+07
470	85430000	88697000	102060000	92062000	5087000		9.95688e+06	1.03376e+07	1.18951e+07	592890	1.07299e+07
471	84385000	87781000	100870000	91012000	5025300		9.83508e+06	1.02309e+07	1.17564e+07	585699	1.06075e+07
472	83360000	86866000	99691000	89972000	4963500		9.71562e+06	1.01242e+07	1.1619e+07	578497	1.04863e+07
473	82356000	85950000	98528000	88945000	4902600		9.5986e+06	1.00175e+07	1.14834e+07	571399	1.03665e+07
474	81371000	85033000	97379000	87928000	4842500		9.4838e+06	9.91061e+06	1.13495e+07	564394	1.0248e+07
475	80409000	84117000	96245000	86924000	4781900		9.37168e+06	9.80385e+06	1.12174e+07	557331	1.0131e+07
476	79466000	83200000	95126000	85931000	4722200		9.26177e+06	9.69697e+06	1.10869e+07	550373	1.00152e+07
477	78544000	82285000	94021000	84950000	4662500		9.15431e+06	9.59033e+06	1.09582e+07	543415	9.90093e+06
478	77640000	81370000	92933000	83981000	4603700		9.04895e+06	9.48368e+06	1.08314e+07	536562	9.788e+06
479	76758000	80456000	91861000	83025000	4545300		8.94615e+06	9.37716e+06	1.07064e+07	529755	9.67657e+06
480	75896000	79547000	90807000	82083000	4487400		8.84569e+06	9.27121e+06	1.05836e+07	523007	9.56682e+06
481	75052000	78641000	89769000	81154000	4430300		8.74732e+06	9.16562e+06	1.04626e+07	516352	9.45851e+06
482	74229000	77738000	88747000	80238000	4373500		8.6514e+06	9.06037e+06	1.03435e+07	509732	9.35175e+06
483	73424000	76840000	87744000	79336000	4318000		8.55758e+06	8.95571e+06	1.02266e+07	503263	9.24662e+06
484	72639000	75946000	86758000	78448000	4263500		8.46608e+06	8.85152e+06	1.01117e+07	496911	9.14308e+06
485	71870000	75058000	85789000	77572000	4210200		8.37646e+06	8.74802e+06	9.99872e+06	490699	9.04106e+06
486	71122000	74175000	84835000	76711000	4156800		8.28928e+06	8.6451e+06	9.88753e+06	484476	8.94064e+06
487	70390000	73300000	83901000	75864000	4105300		8.20396e+06	8.54312e+06	9.77867e+06	478473	8.84192e+06
488	69678000	72431000	82984000	75031000	4055000		8.12098e+06	8.44184e+06	9.67179e+06	472611	8.74487e+06
489	68986000	71572000	82086000	74214000	4005800		8.04033e+06	8.34172e+06	9.56713e+06	466876	8.64973e+06
490	68308000	70720000	81204000	73411000	3958200		7.96131e+06	8.24242e+06	9.46434e+06	461329	8.55602e+06
491	67651000	69877000	80337000	72622000	3911000		7.88473e+06	8.14417e+06	9.36329e+06	455828	8.46406e+06
492	67010000	69044000	79489000	71848000	3865600		7.81002e+06	8.04709e+06	9.26445e+06	450536	8.37385e+06
493	66387000	68217000	78657000	71087000	3821800		7.73741e+06	7.9507e+06	9.16748e+06	445431	8.2852e+06
494	65781000	67405000	77841000	70342000	3778600		7.66678e+06	7.85606e+06	9.07238e+06	440396	8.19841e+06
495	65192000	66602000	77039000	69611000	3736300		7.59814e+06	7.76247e+06	8.9789e+06	435466	8.11317e+06
496	64619000	65811000	76253000	68895000	3695400		7.53135e+06	7.67028e+06	8.8873e+06	430699	8.02964e+06
497	64063000	65032000	75483000	68193000	3656100		7.46655e+06	7.57949e+06	8.79755e+06	426119	7.94786e+06
498	63524000	64265000	74729000	67506000	3617800		7.40373e+06	7.49009e+06	8.70967e+06	421655	7.86783e+06
499	63001000	63511000	73989000	66833000	3580600		7.34277e+06	7.40221e+06	8.62343e+06	417319	7.78947e+06
500	62493000	62768000	73262000	66174000	3544700		7.28357e+06	7.31562e+06	8.53869e+06	413135	7.71263e+06
501	62001000	62038000	72548000	65529000	3509600		7.22622e+06	7.23054e+06	8.45548e+06	409044	7.63741e+06
502	61524000	61323000	71846000	64897000	3474700		7.17063e+06	7.1472e+06	8.37366e+06	404977	7.56383e+06
503	61063000	60621000	71158000	64281000	3441200		7.1169e+06	7.06538e+06	8.29347e+06	401072	7.49192e+06
504	60614000	59932000	70483000	63676000	3409000		7.06457e+06	6.98508e+06	8.2148e+06	397319	7.42148e+06
505	60181000	59256000	69819000	63085000	3377400		7.0141e+06	6.90629e+06	8.13741e+06	393636	7.3526e+06
506	59763000	58594000	69167000	62508000	3346500		6.96538e+06	6.82914e+06	8.06142e+06	390035	7.28531e+06
507	59359000	57945000	68526000	61943000	3316600		6.9183e+06	6.7535e+06	7.98671e+06	386550	7.2195e+06
508	58971000	57311000	67896000	61393000	3286800		6.87308e+06	6.6796e+06	7.91329e+06	383077	7.15532e+06
509	58597000	56689000	67276000	60854000	3257900		6.82949e+06	6.60711e+06	7.84103e+06	379709	7.09254e+06
510	58236000	56081000	66665000	60328000	3229300		6.78741e+06	6.53625e+06	7.76981e+06	376375	7.03116e+06
511	57886000	55488000	66064000	59813000	3201500		6.74662e+06	6.46713e+06	7.69977e+06	373135	6.97117e+06
512	57551000	54907000	65471000	59310000	3173800		6.70758e+06	6.39942e+06	7.63065e+06	369907	6.91255e+06
513	57228000	54340000	64888000	58819000	3147100		6.66993e+06	6.33333e+06	7.5627e+06	366795	6.85532e+06
514	56918000	53784000	64314000	58338000	3121700		6.6338e+06	6.26853e+06	7.4958e+06	363834	6.79938e+06
515	56619000	53242000	63747000	57869000	3096200		6.59895e+06	6.20536e+06	7.42972e+06	360862	6.74468e+06
516	56331000	52713000	63186000	57410000	3071100		6.56538e+06	6.14371e+06	7.36434e+06	357937	6.69114e+06
517	56053000	52196000	62634000	56961000	3047300		6.53298e+06	6.08345e+06	7300000	355163	6.63881e+06
518	55787000	51692000	62091000	56523000	3024300		6.50198e+06	6.02471e+06	7.23671e+06	352483	6.5878e+06
519	55532000	51198000	61553000	56094000	3002500		6.47226e+06	5.96713e+06	7.17401e+06	349942	6.5378e+06
520	55287000	50716000	61021000	55675000	2981100		6.44371e+06	5.91096e+06	7.112e+06	347448	6.48889e+06
521	55050000	50246000	60494000	55263000	2960300		6.41608e+06	5.85618e+06	7.05058e+06	345023	6.44095e+06
522	54824000	49787000	59975000	54862000	2941100		6.38974e+06	5.80268e+06	6.99009e+06	342786	6.39417e+06
523	54606000	49339000	59462000	54469000	2923000		6.36434e+06	5.75047e+06	6.9303e+06	340676	6.34837e+06
524	54396000	48900000	58954000	54083000	2906700		6.33986e+06	5.6993e+06	6.8711e+06	338776	6.30342e+06
525	54194000	48470000	58452000	53705000	2891900		6.31632e+06	5.64918e+06	6.81259e+06	337051	6.25936e+06
526	53999000	48051000	57955000	53335000	2878100		6.29359e+06	5.60035e+06	6.75466e+06	335443	6.2162e+06
527	53812000	47642000	57463000	52972000	2866100		6.27179e+06	5.55268e+06	6.69732e+06	334044	6.17393e+06
528	53631000	47241000	56976000	52616000	2855700		6.2507e+06	5.50594e+06	6.64056e+06	332832	6.1324e+06
529	53456000	46848000	56494000	52266000	2847400		6.2303e+06	5.46014e+06	6.58438e+06	331865	6.09161e+06
530	53286000	46463000	56014000	51921000	2840200		6.21049e+06	5.41527e+06	6.52844e+06	331026	6.0514e+06
531	53120000	46086000	55540000	51582000	2835400		6.19114e+06	5.37133e+06	6.47319e+06	330466	6.01189e+06
532	52960000	45717000	55073000	51250000	2832800		6.17249e+06	5.32832e+06	6.41876e+06	330163	5.97319e+06
533	52803000	45355000	54608000	50922000	2831900		6.1542e+06	5.28613e+06	6.36457e+06	330058	5.93497e+06
534	52651000	45000000	54147000	50599000	2832900		6.13648e+06	5.24476e+06	6.31084e+06	330175	5.89736e+06
535	52502000	44650000	53690000	50281000	2836200		6.11911e+06	5.20396e+06	6.25758e+06	330559	5.86022e+06
536	52355000	44307000	53240000	49967000	2841700		6.10198e+06	5.16399e+06	6.20513e+06	331200	5.8237e+06
537	52211000	43970000	52794000	49658000	2849200		6.0852e+06	5.12471e+06	6.15315e+06	332075	5.78768e+06
538	52069000	43638000	52351000	49353000	2858400		6.06865e+06	5.08601e+06	6.10152e+06	333147	5.75206e+06
539	51926000	43312000	51913000	49050000	2869200		6.05198e+06	5.04802e+06	6.05047e+06	334406	5.71682e+06
540	51785000	42990000	51479000	48751000	2882200		6.03555e+06	5.01049e+06	5.99988e+06	335921	5.68197e+06
541	51645000	42673000	51049000	48456000	2896500		6.01923e+06	4.97354e+06	5.94977e+06	337587	5.64751e+06
542	51505000	42361000	50622000	48162000	2912100		6.00291e+06	4.93718e+06	5900000	339406	5.61336e+06
543	51364000	42052000	50200000	47872000	2929400		5.98648e+06	4.90117e+06	5.85082e+06	341422	5.57949e+06
544	51222000	41748000	49782000	47584000	2947700		5.96993e+06	4.86573e+06	5.8021e+06	343555	5.54592e+06
545	51080000	41447000	49364000	47297000	2966600		5.95338e+06	4.83065e+06	5.75338e+06	345758	5.51247e+06
546	50936000	41150000	48954000	47013000	2986800		5.9366e+06	4.79604e+06	5.70559e+06	348112	5.47941e+06
547	50789000	40855000	48548000	46731000	3008100		5.91946e+06	4.76166e+06	5.65828e+06	350594	5.44646e+06
548	50640000	40565000	48147000	46451000	3029500		5.9021e+06	4.72786e+06	5.61154e+06	353089	5.41383e+06
549	50487000	40277000	47749000	46171000	3051100		5.88427e+06	4.69429e+06	5.56515e+06	355606	5.38124e+06
550	50333000	39992000	47355000	45893000	3073100		5.86632e+06	4.66107e+06	5.51923e+06	358170	5.34887e+06
551	50176000	39711000	46965000	45617000	3095300		5.84802e+06	4.62832e+06	5.47378e+06	360758	5.31671e+06
552	50014000	39431000	46577000	45341000	3116800		5.82914e+06	4.59569e+06	5.42855e+06	363263	5.28446e+06
553	49849000	39154000	46195000	45066000	3138500		5.80991e+06	4.5634e+06	5.38403e+06	365793	5.25245e+06
554	49682000	38879000	45817000	44793000	3160200		5.79044e+06	4.53135e+06	5.33998e+06	368322	5.22059e+06
555	49508000	38606000	45443000	44519000	3180800		5.77016e+06	4.49953e+06	5.29639e+06	370723	5.18869e+06
556	49332000	38336000	45072000	44247000	3201200		5.74965e+06	4.46807e+06	5.25315e+06	373100	5.15695e+06
557	49152000	38067000	44705000	43975000	3220800		5.72867e+06	4.43671e+06	5.21037e+06	375385	5.12525e+06
558	48967000	37800000	44342000	43703000	3239600		5.70711e+06	4.40559e+06	5.16807e+06	377576	5.09359e+06
559	48778000	37533000	43983000	43431000	3257800		5.68508e+06	4.37448e+06	5.12622e+06	379697	5.06193e+06
560	48583000	37269000	43627000	43160000	3274500		5.66235e+06	4.34371e+06	5.08473e+06	381643	5.03026e+06
561	48383000	37007000	43276000	42888000	3289700		5.63904e+06	4.31317e+06	5.04382e+06	383415	4.99868e+06
562	48178000	36746000	42926000	42617000	3303900		5.61515e+06	4.28275e+06	5.00303e+06	385070	4.96698e+06
563	47969000	36486000	42581000	42346000	3316900		5.59079e+06	4.25245e+06	4.96282e+06	386585	4.93535e+06
564	47756000	36229000	42241000	42075000	3328700		5.56597e+06	4.22249e+06	4.92319e+06	387960	4.90389e+06
565	47538000	35972000	41904000	41805000	3339100		5.54056e+06	4.19254e+06	4.88392e+06	389172	4.87234e+06
566	47314000	35716000	41571000	41534000	3348200		5.51445e+06	4.1627e+06	4.8451e+06	390233	4.84075e+06
567	47086000	35461000	41237000	41261000	3355800		5.48788e+06	4.13298e+06	4.80618e+06	391119	4.80901e+06
568	46853000	35208000	40911000	40991000	3361900		5.46072e+06	4.1035e+06	4.76818e+06	391830	4.77747e+06
569	46616000	34956000	40588000	40720000	3366500		5.4331e+06	4.07413e+06	4.73054e+06	392366	4.74592e+06
570	46374000	34705000	40269000	40450000	3369600		5.4049e+06	4.04487e+06	4.69336e+06	392727	4.71437e+06
571	46128000	34456000	39953000	40179000	3371300		5.37622e+06	4.01585e+06	4.65653e+06	392925	4.68287e+06
572	45877000	34206000	39640000	39908000	3371700		5.34697e+06	3.98671e+06	4.62005e+06	392972	4.65124e+06
573	45622000	33956000	39331000	39636000	3371300		5.31725e+06	3.95758e+06	4.58403e+06	392925	4.61962e+06
574	45363000	33709000	39024000	39365000	3368600		5.28706e+06	3.92879e+06	4.54825e+06	392611	4.58803e+06
575	45101000	33464000	38721000	39095000	3364500		5.25653e+06	3.90023e+06	4.51294e+06	392133	4.55657e+06
576	44834000	33218000	38420000	38824000	3359300		5.22541e+06	3.87156e+06	4.47786e+06	391527	4.52494e+06
577	44564000	32975000	38123000	38554000	3352600		5.19394e+06	3.84324e+06	4.44324e+06	390746	4.49347e+06
578	44291000	32732000	37829000	38284000	3344500		5.16212e+06	3.81492e+06	4.40897e+06	389802	4.462e+06
579	44015000	32489000	37538000	38014000	3335600		5.12995e+06	3.7866e+06	4.37506e+06	388765	4.43054e+06
580	43736000	32248000	37249000	37744000	3325600		5.09744e+06	3.75851e+06	4.34138e+06	387599	4.39911e+06
581	43455000	32007000	36964000	37475000	3314700		5.06469e+06	3.73042e+06	4.30816e+06	386329	4.36775e+06
582	43172000	31767000	36682000	37207000	3302900		5.0317e+06	3.70245e+06	4.27529e+06	384953	4.33648e+06
583	42886000	31528000	36402000	36939000	3289800		4.99837e+06	3.67459e+06	4.24266e+06	383427	4.30521e+06
584	42599000	31290000	36125000	36671000	3276000		4.96492e+06	3.64685e+06	4.21037e+06	381818	4.27405e+06
585	42309000	31052000	35851000	36404000	3261100		4.93112e+06	3.61911e+06	4.17844e+06	380082	4.24289e+06
586	42018000	30816000	35579000	36138000	3245600		4.8972e+06	3.59161e+06	4.14674e+06	378275	4.21185e+06
587	41725000	30581000	35310000	35872000	3229400		4.86305e+06	3.56422e+06	4.11538e+06	376387	4.18089e+06
588	41432000	30346000	35044000	35608000	3212700		4.8289e+06	3.53683e+06	4.08438e+06	374441	4.15004e+06
589	41139000	30112000	34781000	35344000	3195400		4.79476e+06	3.50956e+06	4.05373e+06	372424	4.11935e+06
590	40844000	29879000	34520000	35081000	3177700		4.76037e+06	3.4824e+06	4.02331e+06	370361	4.08869e+06
591	40549000	29647000	34262000	34820000	3159500		4.72599e+06	3.45536e+06	3.99324e+06	368240	4.0582e+06
592	40254000	29414000	34007000	34558000	3141500		4.69161e+06	3.42821e+06	3.96352e+06	366142	4.02778e+06
593	39959000	29184000	33754000	34299000	3122600		4.65723e+06	3.4014e+06	3.93403e+06	363939	3.99755e+06
594	39665000	28955000	33503000	34041000	3103500		4.62296e+06	3.37471e+06	3.90478e+06	361713	3.96748e+06
595	39371000	28726000	33256000	33785000	3084200		4.58869e+06	3.34802e+06	3.87599e+06	359464	3.93757e+06
596	39078000	28499000	33010000	33529000	3064900		4.55455e+06	3.32156e+06	3.84732e+06	357214	3.90781e+06
597	38786000	28271000	32768000	33275000	3045900		4.52051e+06	3.29499e+06	3.81911e+06	355000	3.87821e+06
598	38495000	28046000	32528000	33023000	3026400		4.4866e+06	3.26876e+06	3.79114e+06	352727	3.84883e+06
599	38205000	27822000	32290000	32773000	3007100		4.4528e+06	3.24266e+06	3.7634e+06	350478	3.81962e+06
600	37917000	27599000	32055000	32524000	2987700		4.41923e+06	3.21667e+06	3.73601e+06	348217	3.79064e+06
601	37630000	27378000	31822000	32277000	2968300		4.38578e+06	3.19091e+06	3.70886e+06	345956	3.76185e+06
602	37345000	27158000	31593000	32032000	2948800		4.35256e+06	3.16527e+06	3.68217e+06	343683	3.73333e+06
603	37062000	26940000	31367000	31790000	2929700		4.31958e+06	3.13986e+06	3.65583e+06	341457	3.70509e+06
604	36781000	26722000	31143000	31549000	2910900		4.28683e+06	3.11445e+06	3.62972e+06	339266	3.677e+06
605	36503000	26507000	30921000	31310000	2892200		4.25443e+06	3.08939e+06	3.60385e+06	337086	3.64922e+06
606	36225000	26292000	30703000	31073000	2873600		4.22203e+06	3.06434e+06	3.57844e+06	334918	3.6216e+06
607	35952000	26078000	30487000	30839000	2855700		4.19021e+06	3.03939e+06	3.55326e+06	332832	3.59429e+06
608	35681000	25867000	30275000	30607000	2838000		4.15862e+06	3.0148e+06	3.52855e+06	330769	3.56733e+06
609	35413000	25657000	30065000	30378000	2820700		4.12739e+06	2.99033e+06	3.50408e+06	328753	3.5406e+06
610	35147000	25448000	29858000	30151000	2803500		4.09639e+06	2.96597e+06	3.47995e+06	326748	3.5141e+06
611	34884000	25242000	29654000	29927000	2786800		4.06573e+06	2.94196e+06	3.45618e+06	324802	3.48796e+06
612	34624000	25037000	29453000	29704000	2770300		4.03543e+06	2.91807e+06	3.43275e+06	322879	3.46208e+06
613	34367000	24834000	29255000	29485000	2754300		4.00548e+06	2.89441e+06	3.40967e+06	321014	3.43652e+06
614	34112000	24633000	29060000	29268000	2738400		3.97576e+06	2.87098e+06	3.38695e+06	319161	3.41123e+06
615	33862000	24434000	28868000	29054000	2723200		3.94662e+06	2.84779e+06	3.36457e+06	317389	3.38632e+06
616	33614000	24237000	28680000	28843000	2708200		3.91772e+06	2.82483e+06	3.34266e+06	315641	3.36173e+06
617	33370000	24042000	28494000	28635000	2693700		3.88928e+06	2.8021e+06	3.32098e+06	313951	3.33745e+06
618	33129000	23849000	28311000	28429000	2679500		3.86119e+06	2.7796e+06	3.29965e+06	312296	3.31348e+06
619	32891000	23658000	28132000	28227000	2665700		3.83345e+06	2.75734e+06	3.27879e+06	310688	3.28986e+06
620	32656000	23469000	27956000	28027000	2652100		3.80606e+06	2.73531e+06	3.25828e+06	309103	3.26655e+06
621	32424000	23283000	27783000	27830000	2638800		3.77902e+06	2.71364e+06	3.23811e+06	307552	3.24359e+06
622	32196000	23099000	27614000	27636000	2625900		3.75245e+06	2.69219e+06	3.21841e+06	306049	3.22102e+06
623	31971000	22918000	27448000	27445000	2613300		3.72622e+06	2.6711e+06	3.19907e+06	304580	3.1988e+06
624	31747000	22739000	27285000	27257000	2600400		3.70012e+06	2.65023e+06	3.18007e+06	303077	3.17681e+06
625	31528000	22562000	27125000	27072000	2588400		3.67459e+06	2.6296e+06	3.16142e+06	301678	3.15521e+06
626	31313000	22388000	26969000	26890000	2576500		3.64953e+06	2.60932e+06	3.14324e+06	300291	3.13403e+06
627	31100000	22217000	26816000	26711000	2564900		3.62471e+06	2.58939e+06	3.12541e+06	298939	3.11317e+06
628	30891000	22048000	26666000	26535000	2553500		3.60035e+06	2.5697e+06	3.10793e+06	297611	3.09266e+06
629	30684000	21882000	26519000	26362000	2542300		3.57622e+06	2.55035e+06	3.09079e+06	296305	3.07246e+06
630	30481000	21718000	26376000	26192000	2531300		3.55256e+06	2.53124e+06	3.07413e+06	295023	3.05264e+06
631	30281000	21558000	26237000	26025000	2520400		3.52925e+06	2.51259e+06	3.05793e+06	293753	3.03326e+06
632	30083000	21400000	26100000	25861000	2509500		3.50618e+06	2.49417e+06	3.04196e+06	292483	3.0141e+06
633	29888000	21245000	25967000	25700000	2498800		3.48345e+06	2.47611e+06	3.02646e+06	291235	2.99534e+06
634	29696000	21092000	25837000	25542000	2488100		3.46107e+06	2.45828e+06	3.01131e+06	289988	2.97688e+06
635	29507000	20943000	25710000	25387000	2477400		3.43904e+06	2.44091e+06	2.9965e+06	288741	2.95882e+06
636	29320000	20796000	25587000	25234000	2466900		3.41725e+06	2.42378e+06	2.98217e+06	287517	2.94106e+06
637	29136000	20653000	25466000	25085000	2456300		3.3958e+06	2.40711e+06	2.96807e+06	286282	2.92366e+06
638	28954000	20512000	25348000	24938000	2445700		3.37459e+06	2.39068e+06	2.95431e+06	285047	2.90653e+06
639	28775000	20374000	25233000	24794000	2435100		3.35373e+06	2.37459e+06	2.94091e+06	283811	2.88974e+06
640	28598000	20239000	25122000	24653000	2424500		3.3331e+06	2.35886e+06	2.92797e+06	282576	2.87331e+06
641	28423000	20106000	25013000	24514000	2413800		3.3127e+06	2.34336e+06	2.91527e+06	281329	2.85711e+06
642	28251000	19977000	24907000	24378000	2403100		3.29266e+06	2.32832e+06	2.90291e+06	280082	2.8413e+06
643	28081000	19850000	24804000	24245000	2392300		3.27284e+06	2.31352e+06	2.89091e+06	278823	2.82576e+06
644	27912000	19726000	24703000	24114000	2381300		3.25315e+06	2.29907e+06	2.87914e+06	277541	2.81045e+06
645	27746000	19605000	24605000	23986000	2370300		3.2338e+06	2.28497e+06	2.86772e+06	276259	2.79549e+06
646	27582000	19487000	24510000	23860000	2359100		3.21469e+06	2.27121e+06	2.85664e+06	274953	2.78085e+06
647	27419000	19371000	24418000	23736000	2348200		3.19569e+06	2.25769e+06	2.84592e+06	273683	2.76643e+06
648	27258000	19258000	24327000	23615000	2336600		3.17692e+06	2.24452e+06	2.83531e+06	272331	2.75225e+06
649	27099000	19149000	24239000	23496000	2325000		3.15839e+06	2.23182e+06	2.82506e+06	270979	2.73842e+06
650	26942000	19042000	24153000	23379000	2313200		3.14009e+06	2.21935e+06	2.81503e+06	269604	2.72483e+06
651	26786000	18938000	24070000	23264000	2301100		3.12191e+06	2.20723e+06	2.80536e+06	268193	2.7115e+06
652	26632000	18836000	23988000	23152000	2289000		3.10396e+06	2.19534e+06	2.7958e+06	266783	2.69837e+06
653	26479000	18737000	23908000	23041000	2276500		3.08613e+06	2.1838e+06	2.78648e+06	265326	2.68547e+06
654	26327000	18640000	23830000	22933000	2263800		3.06841e+06	2.17249e+06	2.77739e+06	263846	2.67277e+06
655	26177000	18547000	23754000	22826000	2250900		3.05093e+06	2.16166e+06	2.76853e+06	262343	2.66037e+06
656	26028000	18455000	23679000	22721000	2237800		3.03357e+06	2.15093e+06	2.75979e+06	260816	2.6481e+06
657	25879000	18367000	23606000	22617000	2224300		3.0162e+06	2.14068e+06	2.75128e+06	259242	2.63605e+06
658	25733000	18280000	23533000	22515000	2210700		2.99918e+06	2.13054e+06	2.74277e+06	257657	2.62416e+06
659	25587000	18196000	23462000	22415000	2196900		2.98217e+06	2.12075e+06	2.7345e+06	256049	2.61247e+06
660	25442000	18114000	23393000	22316000	2182800		2.96527e+06	2.11119e+06	2.72646e+06	254406	2.60097e+06
661	25298000	18035000	23324000	22219000	2168400		2.94848e+06	2.10198e+06	2.71841e+06	252727	2.58963e+06
662	25155000	17958000	23256000	22123000	2153700		2.93182e+06	2.09301e+06	2.71049e+06	251014	2.57844e+06
663	25013000	17882000	23190000	22028000	2138700		2.91527e+06	2.08415e+06	2.7028e+06	249266	2.5674e+06
664	24871000	17809000	23124000	21935000	2123500		2.89872e+06	2.07564e+06	2.6951e+06	247494	2.55649e+06
665	24731000	17739000	23058000	21843000	2108000		2.8824e+06	2.06748e+06	2.68741e+06	245688	2.54577e+06
666	24591000	17670000	22993000	21751000	2092000		2.86608e+06	2.05944e+06	2.67984e+06	243823	2.53512e+06
667	24451000	17603000	22928000	21661000	2075900		2.84977e+06	2.05163e+06	2.67226e+06	241946	2.52455e+06
668	24312000	17538000	22864000	21571000	2059400		2.83357e+06	2.04406e+06	2.6648e+06	240023	2.51414e+06
669	24174000	17475000	22800000	21483000	2042700		2.81748e+06	2.03671e+06	2.65734e+06	238077	2.50385e+06
670	24036000	17414000	22735000	21395000	2025700		2.8014e+06	2.0296e+06	2.64977e+06	236096	2.49359e+06
671	23899000	17355000	22671000	21308000	2008200		2.78543e+06	2.02273e+06	2.64231e+06	234056	2.48349e+06
672	23762000	17297000	22607000	21222000	1990600		2.76946e+06	2.01597e+06	2.63485e+06	232005	2.47343e+06
673	23626000	17240000	22542000	21136000	1972800		2.75361e+06	2.00932e+06	2.62727e+06	229930	2.4634e+06
674	23490000	17186000	22477000	21051000	1954400		2.73776e+06	2.00303e+06	2.6197e+06	227786	2.4535e+06
675	23354000	17133000	22411000	20966000	1935600		2.72191e+06	1.99685e+06	2.612e+06	225594	2.44359e+06
676	23219000	17082000	22345000	20882000	1916500		2.70618e+06	1.99091e+06	2.60431e+06	223368	2.4338e+06
677	23084000	17033000	22278000	20798000	1897100		2.69044e+06	1.9852e+06	2.5965e+06	221107	2.42405e+06
678	22950000	16984000	22211000	20715000	1877500		2.67483e+06	1.97949e+06	2.58869e+06	218823	2.41434e+06
679	22815000	16938000	22142000	20632000	1857300		2.65909e+06	1.97413e+06	2.58065e+06	216469	2.40462e+06
680	22681000	16892000	22074000	20549000	1836900		2.64347e+06	1.96876e+06	2.57273e+06	214091	2.39499e+06
681	22547000	16848000	22004000	20466000	1816000		2.62786e+06	1.96364e+06	2.56457e+06	211655	2.38535e+06
682	22414000	16805000	21933000	20384000	1794800		2.61235e+06	1.95862e+06	2.55629e+06	209184	2.37576e+06
683	22280000	16763000	21861000	20301000	1773300		2.59674e+06	1.95373e+06	2.5479e+06	206678	2.36612e+06
684	22147000	16723000	21788000	20219000	1751400		2.58124e+06	1.94907e+06	2.53939e+06	204126	2.35657e+06
685	22015000	16683000	21714000	20137000	1729100		2.56585e+06	1.94441e+06	2.53077e+06	201527	2.34701e+06
686	21882000	16645000	21638000	20055000	1706300		2.55035e+06	1.93998e+06	2.52191e+06	198869	2.33741e+06
687	21750000	16608000	21561000	19973000	1683400		2.53497e+06	1.93566e+06	2.51294e+06	196200	2.32786e+06
688	21618000	16571000	21483000	19891000	1660100		2.51958e+06	1.93135e+06	2.50385e+06	193485	2.31826e+06
689	21486000	16537000	21403000	19809000	1636300		2.5042e+06	1.92739e+06	2.49452e+06	190711	2.3087e+06
690	21354000	16503000	21323000	19727000	1612000		2.48881e+06	1.92343e+06	2.4852e+06	187879	2.29915e+06
691	21223000	16469000	21241000	19644000	1587500		2.47354e+06	1.91946e+06	2.47564e+06	185023	2.28955e+06
692	21092000	16437000	21157000	19562000	1562500		2.45828e+06	1.91573e+06	2.46585e+06	182110	2.27995e+06
693	20962000	16406000	21072000	19480000	1537200		2.44312e+06	1.91212e+06	2.45594e+06	179161	2.2704e+06
694	20832000	16376000	20986000	19398000	1511500		2.42797e+06	1.90862e+06	2.44592e+06	176166	2.26084e+06
695	20702000	16347000	20898000	19315000	1485400		2.41282e+06	1.90524e+06	2.43566e+06	173124	2.25124e+06
696	20572000	16318000	20808000	19233000	1459000		2.39767e+06	1.90186e+06	2.42517e+06	170047	2.24157e+06
697	20443000	16290000	20718000	19150000	1432200		2.38263e+06	1.8986e+06	2.41469e+06	166923	2.23197e+06
698	20314000	16263000	20625000	19068000	1405100		2.3676e+06	1.89545e+06	2.40385e+06	163765	2.2223e+06
699	20185000	16237000	20531000	18985000	1377500		2.35256e+06	1.89242e+06	2.39289e+06	160548	2.21263e+06
700	20057000	16211000	20436000	18901000	1349500		2.33765e+06	1.88939e+06	2.38182e+06	157284	2.20295e+06
701	19929000	16186000	20340000	18818000	1321300		2.32273e+06	1.88648e+06	2.37063e+06	153998	2.19328e+06
702	19802000	16162000	20242000	18735000	1292800		2.30793e+06	1.88368e+06	2.35921e+06	150676	2.18361e+06
703	19676000	16139000	20143000	18652000	1263900		2.29324e+06	1.881e+06	2.34767e+06	147308	2.17397e+06
704	19549000	16116000	20042000	18569000	1234700		2.27844e+06	1.87832e+06	2.3359e+06	143904	2.16422e+06
705	19424000	16093000	19940000	18486000	1205300		2.26387e+06	1.87564e+06	2.32401e+06	140478	2.15451e+06
706	19299000	16072000	19836000	18402000	1175500		2.2493e+06	1.87319e+06	2.31189e+06	137005	2.14479e+06
707	19174000	16051000	19732000	18319000	1145400		2.23473e+06	1.87075e+06	2.29977e+06	133497	2.13508e+06
708	19050000	16031000	19626000	18236000	1115000		2.22028e+06	1.86841e+06	2.28741e+06	129953	2.12537e+06
709	18927000	16011000	19519000	18152000	1084200		2.20594e+06	1.86608e+06	2.27494e+06	126364	2.11566e+06
710	18804000	15992000	19411000	18069000	1053300		2.19161e+06	1.86387e+06	2.26235e+06	122762	2.10594e+06
711	18682000	15973000	19301000	17986000	1021900		2.17739e+06	1.86166e+06	2.24953e+06	119103	2.09619e+06
712	18561000	15955000	19191000	17903000	990530		2.16329e+06	1.85956e+06	2.23671e+06	115446	2.08652e+06
713	18441000	15938000	19080000	17819000	958890		2.1493e+06	1.85758e+06	2.22378e+06	111759	2.07688e+06
714	18321000	15920000	18968000	17737000	927090		2.13531e+06	1.85548e+06	2.21072e+06	108052	2.06717e+06
715	18203000	15904000	18855000	17654000	895060		2.12156e+06	1.85361e+06	2.19755e+06	104319	2.05758e+06
716	18084000	15887000	18741000	17571000	862920		2.10769e+06	1.85163e+06	2.18427e+06	100573	2.04786e+06
717	17968000	15872000	18627000	17489000	830590		2.09417e+06	1.84988e+06	2.17098e+06	96805.4	2.03834e+06
718	17851000	15856000	18511000	17406000	798140		2.08054e+06	1.84802e+06	2.15746e+06	93023.3	2.02867e+06
719	17736000	15841000	18396000	17324000	765600		2.06713e+06	1.84627e+06	2.14406e+06	89230.8	2.01915e+06
720	17622000	15827000	18279000	17243000	732920		2.05385e+06	1.84464e+06	2.13042e+06	85421.9	2.00963e+06
721	17508000	15813000	18162000	17161000	700080		2.04056e+06	1.84301e+06	2.11678e+06	81594.4	2.00012e+06
722	17396000	15799000	18045000	17080000	667310		2.02751e+06	1.84138e+06	2.10315e+06	77775.1	1.99068e+06
723	17285000	15785000	17927000	16999000	634550		2.01457e+06	1.83974e+06	2.08939e+06	73956.9	1.98124e+06
724	17175000	15772000	17808000	16918000	601510		2.00175e+06	1.83823e+06	2.07552e+06	70106.1	1.97183e+06
725	17066000	15759000	17690000	16838000	568770		1.98904e+06	1.83671e+06	2.06177e+06	66290.2	1.96251e+06
726	16958000	15747000	17572000	16759000	536050		1.97646e+06	1.83531e+06	2.04802e+06	62476.7	1.95326e+06
727	16851000	15735000	17453000	16680000	503410		1.96399e+06	1.83392e+06	2.03415e+06	58672.5	1.94402e+06
728	16745000	15723000	17335000	16601000	470870		1.95163e+06	1.83252e+06	2.0204e+06	54880	1.93485e+06
729	16641000	15711000	17216000	16523000	438470		1.93951e+06	1.83112e+06	2.00653e+06	51103.7	1.92572e+06
730	16538000	15700000	17098000	16445000	406300		1.92751e+06	1.82984e+06	1.99277e+06	47354.3	1.91671e+06
731	16436000	15689000	16980000	16368000	374340		1.91562e+06	1.82855e+06	1.97902e+06	43629.4	1.90773e+06
732	16334000	15677000	16862000	16291000	342870		1.90373e+06	1.82716e+06	1.96527e+06	39961.5	1.89872e+06
733	16235000	15666000	16744000	16215000	311460		1.89219e+06	1.82587e+06	1.95152e+06	36300.7	1.88986e+06
734	16136000	15655000	16627000	16139000	280630		1.88065e+06	1.82459e+06	1.93788e+06	32707.5	1.88104e+06
735	16039000	15644000	16510000	16064000	250300		1.86935e+06	1.82331e+06	1.92424e+06	29172.5	1.8723e+06
736	15943000	15634000	16394000	15990000	220690		1.85816e+06	1.82214e+06	1.91072e+06	25721.4	1.86368e+06
737	15848000	15623000	16278000	15916000	192180		1.84709e+06	1.82086e+06	1.8972e+06	22398.6	1.85505e+06
738	15754000	15612000	16163000	15843000	164970		1.83613e+06	1.81958e+06	1.8838e+06	19227.3	1.8465e+06
739	15662000	15602000	16048000	15771000	139690		1.82541e+06	1.81841e+06	1.8704e+06	16280.9	1.83807e+06
740	15571000	15592000	15934000	15699000	117730		1.8148e+06	1.81725e+06	1.85711e+06	13721.4	1.82972e+06
741	15481000	15581000	15821000	15628000	100780		1.80431e+06	1.81597e+06	1.84394e+06	11745.9	1.82141e+06
742	15393000	15571000	15709000	15557000	91377		1.79406e+06	1.8148e+06	1.83089e+06	10650	1.81325e+06
743	15305000	15560000	15597000	15487000	91886		1.7838e+06	1.81352e+06	1.81783e+06	10709.3	1.80505e+06
744	15219000	15549000	15487000	15418000	101270		1.77378e+06	1.81224e+06	1.80501e+06	11803	1.79701e+06
745	15134000	15538000	15377000	15350000	117420		1.76387e+06	1.81096e+06	1.79219e+06	13685.3	1.78901e+06
746	15051000	15527000	15269000	15282000	137690		1.7542e+06	1.80967e+06	1.7796e+06	16047.8	1.78116e+06
747	14969000	15516000	15161000	15215000	160310		1.74464e+06	1.80839e+06	1.76702e+06	18684.1	1.77335e+06
748	14888000	15505000	15054000	15149000	184340		1.7352e+06	1.80711e+06	1.75455e+06	21484.8	1.76562e+06
749	14808000	15493000	14949000	15083000	208800		1.72587e+06	1.80571e+06	1.74231e+06	24335.7	1.75796e+06
750	14729000	15481000	14845000	15018000	233690		1.71667e+06	1.80431e+06	1.73019e+06	27236.6	1.75039e+06
751	14652000	15469000	14742000	14954000	258630		1.70769e+06	1.80291e+06	1.71818e+06	30143.4	1.74293e+06
752	14576000	15456000	14640000	14891000	283450		1.69883e+06	1.8014e+06	1.70629e+06	33036.1	1.73551e+06
753	14500000	15444000	14538000	14827000	308240		1.68998e+06	1800000	1.69441e+06	35925.4	1.72813e+06
754	14426000	15430000	14439000	14765000	332530		1.68135e+06	1.79837e+06	1.68287e+06	38756.4	1.72086e+06
755	14353000	15417000	14342000	14704000	356450		1.67284e+06	1.79685e+06	1.67156e+06	41544.3	1.71375e+06
756	14281000	15402000	14245000	14643000	379780		1.66445e+06	1.7951e+06	1.66026e+06	44263.4	1.7066e+06
757	14211000	15388000	14150000	14583000	402830		1.65629e+06	1.79347e+06	1.64918e+06	46949.9	1.69965e+06
758	14141000	15373000	14056000	14523000	425490		1.64814e+06	1.79172e+06	1.63823e+06	49590.9	1.6927e+06
759	14072000	15357000	13964000	14464000	447650		1.64009e+06	1.78986e+06	1.62751e+06	52173.7	1.68582e+06
760	14004000	15342000	13873000	14406000	469290		1.63217e+06	1.78811e+06	1.6169e+06	54695.8	1.67906e+06
761	13937000	15324000	13783000	14348000	490180		1.62436e+06	1.78601e+06	1.60641e+06	57130.5	1.67226e+06
762	13871000	15308000	13694000	14291000	510850		1.61667e+06	1.78415e+06	1.59604e+06	59539.6	1.66562e+06
763	13805000	15290000	13607000	14234000	530920		1.60897e+06	1.78205e+06	1.5859e+06	61878.8	1.65897e+06
764	13741000	15272000	13522000	14178000	550430		1.60152e+06	1.77995e+06	1.57599e+06	64152.7	1.65249e+06
765	13677000	15253000	13437000	14123000	569330		1.59406e+06	1.77774e+06	1.56608e+06	66355.5	1.64596e+06
766	13615000	15233000	13355000	14067000	587620		1.58683e+06	1.77541e+06	1.55653e+06	68487.2	1.63959e+06
767	13553000	15213000	13273000	14013000	605300		1.5796e+06	1.77308e+06	1.54697e+06	70547.8	1.63322e+06
768	13491000	15191000	13193000	13959000	622340		1.57238e+06	1.77051e+06	1.53765e+06	72533.8	1.62685e+06
769	13430000	15170000	13115000	13905000	638830		1.56527e+06	1.76807e+06	1.52855e+06	74455.7	1.62063e+06
770	13370000	15147000	13038000	13852000	654730		1.55828e+06	1.76538e+06	1.51958e+06	76308.9	1.61441e+06
771	13310000	15123000	12962000	13799000	670060		1.55128e+06	1.76259e+06	1.51072e+06	78095.6	1.6082e+06
772	13251000	15099000	12887000	13746000	684730		1.54441e+06	1.75979e+06	1.50198e+06	79805.4	1.60206e+06
773	13193000	15074000	12814000	13694000	698760		1.53765e+06	1.75688e+06	1.49347e+06	81440.6	1.596e+06
774	13135000	15048000	12742000	13642000	712150		1.53089e+06	1.75385e+06	1.48508e+06	83001.2	1.58994e+06
775	13078000	15021000	12672000	13590000	724940		1.52424e+06	1.7507e+06	1.47692e+06	84491.8	1.58395e+06
776	13021000	14993000	12602000	13539000	737090		1.5176e+06	1.74744e+06	1.46876e+06	85907.9	1.57793e+06
777	12964000	14964000	12534000	13487000	748620		1.51096e+06	1.74406e+06	1.46084e+06	87251.7	1.57195e+06
778	12908000	14934000	12468000	13436000	759540		1.50443e+06	1.74056e+06	1.45315e+06	88524.5	1.56605e+06
779	12852000	14903000	12402000	13386000	769820		1.4979e+06	1.73695e+06	1.44545e+06	89722.6	1.5601e+06
780	12796000	14871000	12338000	13335000	779430		1.49138e+06	1.73322e+06	1.438e+06	90842.7	1.5542e+06
781	12741000	14838000	12274000	13285000	788480		1.48497e+06	1.72937e+06	1.43054e+06	91897.4	1.54829e+06
782	12686000	14804000	12212000	13234000	796890		1.47855e+06	1.72541e+06	1.42331e+06	92877.6	1.54242e+06
783	12631000	14769000	12151000	13184000	804720		1.47214e+06	1.72133e+06	1.4162e+06	93790.2	1.53656e+06
784	12576000	14733000	12091000	13133000	811940		1.46573e+06	1.71713e+06	1.40921e+06	94631.7	1.53069e+06
785	12521000	14696000	12032000	13083000	818620		1.45932e+06	1.71282e+06	1.40233e+06	95410.3	1.52483e+06
786	12467000	14657000	11974000	13033000	824570		1.45303e+06	1.70828e+06	1.39557e+06	96103.7	1.51896e+06
787	12412000	14617000	11917000	12982000	829970		1.44662e+06	1.70361e+06	1.38893e+06	96733.1	1.51305e+06
788	12358000	14577000	11861000	12932000	834830		1.44033e+06	1.69895e+06	1.3824e+06	97299.5	1.50723e+06
789	12303000	14535000	11806000	12881000	839110		1.43392e+06	1.69406e+06	1.37599e+06	97798.4	1.50132e+06
790	12249000	14492000	11751000	12831000	842820		1.42762e+06	1.68904e+06	1.36958e+06	98230.8	1.49542e+06
791	12195000	14447000	11698000	12780000	845970		1.42133e+06	1.6838e+06	1.3634e+06	98597.9	1.48951e+06
792	12140000	14402000	11645000	12729000	848530		1.41492e+06	1.67855e+06	1.35723e+06	98896.3	1.48357e+06
793	12085000	14355000	11593000	12678000	850560		1.40851e+06	1.67308e+06	1.35117e+06	99132.9	1.47758e+06
794	12031000	14307000	11542000	12626000	852050		1.40221e+06	1.66748e+06	1.34522e+06	99306.5	1.47164e+06
795	11975000	14258000	11491000	12575000	853000		1.39569e+06	1.66177e+06	1.33928e+06	99417.2	1.46558e+06
796	11920000	14207000	11441000	12523000	853400		1.38928e+06	1.65583e+06	1.33345e+06	99463.9	1.45952e+06
797	11865000	14155000	11392000	12471000	853340		1.38287e+06	1.64977e+06	1.32774e+06	99456.9	1.45346e+06
798	11809000	14102000	11343000	12418000	852700		1.37634e+06	1.64359e+06	1.32203e+06	99382.3	1.44732e+06
799	11754000	14048000	11295000	12365000	851560		1.36993e+06	1.6373e+06	1.31643e+06	99249.4	1.44122e+06
800	11698000	13992000	11247000	12312000	849880		1.3634e+06	1.63077e+06	1.31084e+06	99053.6	1.435e+06
801	11642000	13935000	11200000	12259000	847770		1.35688e+06	1.62413e+06	1.30536e+06	98807.7	1.42879e+06
802	11586000	13877000	11153000	12205000	845180		1.35035e+06	1.61737e+06	1.29988e+06	98505.8	1.42253e+06
803	11529000	13818000	11107000	12151000	842120		1.34371e+06	1.61049e+06	1.29452e+06	98149.2	1.41624e+06
804	11472000	13757000	11060000	12096000	838640		1.33706e+06	1.60338e+06	1.28904e+06	97743.6	1.40983e+06
805	11415000	13695000	11015000	12041000	834670		1.33042e+06	1.59615e+06	1.2838e+06	97280.9	1.40346e+06
806	11357000	13631000	10969000	11986000	830260		1.32366e+06	1.58869e+06	1.27844e+06	96766.9	1.39693e+06
807	11300000	13566000	10924000	11930000	825430		1.31702e+06	1.58112e+06	1.27319e+06	96204	1.39044e+06
808	11242000	13500000	10879000	11874000	820160		1.31026e+06	1.57343e+06	1.26795e+06	95589.7	1.38388e+06
809	11183000	13433000	10833000	11817000	814550		1.30338e+06	1.56562e+06	1.26259e+06	94935.9	1.3772e+06
810	11124000	13365000	10789000	11759000	808550		1.2965e+06	1.55769e+06	1.25746e+06	94236.6	1.37055e+06
811	11066000	13295000	10744000	11701000	802070		1.28974e+06	1.54953e+06	1.25221e+06	93481.4	1.36383e+06
812	11006000	13224000	10699000	11643000	795280		1.28275e+06	1.54126e+06	1.24697e+06	92690	1.35699e+06
813	10947000	13152000	10655000	11584000	788120		1.27587e+06	1.53287e+06	1.24184e+06	91855.5	1.35019e+06
814	10887000	13078000	10610000	11525000	780640		1.26888e+06	1.52424e+06	1.2366e+06	90983.7	1.34324e+06
815	10827000	13004000	10566000	11465000	772850		1.26189e+06	1.51562e+06	1.23147e+06	90075.8	1.33632e+06
816	10766000	12928000	10521000	11405000	764690		1.25478e+06	1.50676e+06	1.22622e+06	89124.7	1.32925e+06
817	10705000	12851000	10476000	11344000	756190		1.24767e+06	1.49779e+06	1.22098e+06	88134	1.32214e+06
818	10644000	12772000	10431000	11283000	747390		1.24056e+06	1.48858e+06	1.21573e+06	87108.4	1.31496e+06
819	10583000	12693000	10386000	11221000	738320		1.23345e+06	1.47937e+06	1.21049e+06	86051.3	1.30777e+06
820	10521000	12612000	10341000	11158000	728980		1.22622e+06	1.46993e+06	1.20524e+06	84962.7	1.30047e+06
821	10459000	12531000	10296000	11095000	719290		1.219e+06	1.46049e+06	1200000	83833.3	1.29316e+06
822	10397000	12448000	10251000	11032000	709360		1.21177e+06	1.45082e+06	1.19476e+06	82676	1.28578e+06
823	10334000	12364000	10205000	10968000	699210		1.20443e+06	1.44103e+06	1.18939e+06	81493	1.27828e+06
824	10271000	12279000	10159000	10903000	688800		1.19709e+06	1.43112e+06	1.18403e+06	80279.7	1.27075e+06
825	10209000	12194000	10113000	10838000	678130		1.18986e+06	1.42121e+06	1.17867e+06	79036.1	1.26325e+06
826	10145000	12107000	10067000	10773000	667260		1.1824e+06	1.41107e+06	1.17331e+06	77769.2	1.25559e+06
827	10082000	12019000	10020000	10707000	656170		1.17506e+06	1.40082e+06	1.16783e+06	76476.7	1.2479e+06
828	10018000	11930000	9973000	10640000	644900		1.1676e+06	1.39044e+06	1.16235e+06	75163.2	1.24013e+06
829	9954600	11840000	9925700	10574000	633450		1.16021e+06	1.37995e+06	1.15684e+06	73828.7	1.23233e+06
830	9890700	11750000	9877800	10506000	621830		1.15276e+06	1.36946e+06	1.15126e+06	72474.4	1.22449e+06
831	9826600	11658000	9829800	10438000	610020		1.14529e+06	1.35874e+06	1.14566e+06	71097.9	1.21657e+06
832	9762400	11566000	9781300	10370000	598060		1.13781e+06	1.34802e+06	1.14001e+06	69704	1.20861e+06
833	9698000	11473000	9732700	10301000	585930		1.1303e+06	1.33718e+06	1.13435e+06	68290.2	1.20061e+06
834	9633600	11379000	9683600	10232000	573680		1.1228e+06	1.32622e+06	1.12862e+06	66862.5	1.19255e+06
835	9569100	11285000	9634000	10163000	561330		1.11528e+06	1.31527e+06	1.12284e+06	65423.1	1.18446e+06
836	9504600	11189000	9584100	10093000	548830		1.10776e+06	1.30408e+06	1.11703e+06	63966.2	1.17629e+06
837	9440000	11094000	9533800	10022000	536230		1.10023e+06	1.29301e+06	1.11117e+06	62497.7	1.16814e+06
838	9375300	10997000	9483200	9951800	523490		1.09269e+06	1.2817e+06	1.10527e+06	61012.8	1.15989e+06
839	9310700	10900000	9432100	9880900	510710		1.08516e+06	1.2704e+06	1.09931e+06	59523.3	1.15162e+06
840	9245900	10802000	9380500	9809600	497910		1.07761e+06	1.25897e+06	1.0933e+06	58031.5	1.14329e+06
841	9181300	10704000	9328600	9738100	484970		1.07008e+06	1.24755e+06	1.08725e+06	56523.3	1.13496e+06
842	9116800	10605000	9275800	9665800	471670		1.06256e+06	1.23601e+06	1.0811e+06	54973.2	1.12656e+06
843	9052300	10506000	9222900	9593600	458690		1.05505e+06	1.22448e+06	1.07493e+06	53460.4	1.11815e+06
844	8988000	10406000	9169800	9521400	445600		1.04755e+06	1.21282e+06	1.06874e+06	51934.7	1.1097e+06
845	8923800	10307000	9116400	9449000	432510		1.04007e+06	1.20128e+06	1.06252e+06	50409.1	1.10129e+06
846	8859600	10207000	9062400	9376300	419430		1.03259e+06	1.18963e+06	1.05622e+06	48884.6	1.09281e+06
847	8795600	10107000	9008200	9303500	406260		1.02513e+06	1.17797e+06	1.04991e+06	47349.7	1.08434e+06
848	8731900	10006000	8953400	9230500	393140		1.0177e+06	1.1662e+06	1.04352e+06	45820.5	1.07581e+06
849	8668300	9905800	8898200	9157500	380030		1.01029e+06	1.15452e+06	1.03709e+06	44292.5	1.0673e+06
850	8605000	9805200	8842800	9084300	366910		1.00291e+06	1.1428e+06	1.03063e+06	42763.4	1.05878e+06
851	8542000	9704400	8787000	9011100	353790		995571	1.13105e+06	1.02413e+06	41234.3	1.05025e+06
852	8479100	9603600	8730800	8937900	340720		988240	1.1193e+06	1.01758e+06	39711	1.04171e+06
853	8416600	9502800	8674300	8864600	327680		980956	1.10755e+06	1.01099e+06	38191.1	1.03317e+06
854	8354200	9402000	8617400	8791200	314700		973683	1.0958e+06	1.00436e+06	36678.3	1.02462e+06
855	8292300	9301200	8560300	8717900	301750		966469	1.08406e+06	997704	35169	1.01608e+06
856	8230600	9200500	8502800	8644600	288820		959277	1.07232e+06	991002	33662	1.00753e+06
857	8169400	9099900	8445000	8571400	275960		952145	1.06059e+06	984266	32163.2	999002
858	8108500	8999600	8386900	8498300	263210		945047	1.0489e+06	977494	30677.2	990482
859	8047700	8899600	8328500	8425300	250650		937960	1.03725e+06	970688	29213.3	981966
860	7987700	8799900	8269900	8352500	238090		930967	1.02563e+06	963858	27749.4	973485
861	7928100	8700600	8210000	8279600	225680		924021	1.01406e+06	956876	26303	964984
862	7869000	8601500	8151100	8207200	213330		917133	1.00251e+06	950012	24863.6	956550
863	7810200	8502900	8091900	8135000	201130		910280	991014	943112	23441.7	948135
864	7752000	8404700	8032500	8063100	189040		903497	979569	936189	22032.6	939751
865	7694200	8307000	7972900	7991400	177140		896760	968182	929242	20645.7	931395
866	7637000	8209700	7913200	7920000	165350		890093	956841	922284	19271.6	923073
867	7580200	8113000	7853300	7848800	153820		883473	945571	915303	17927.7	914782
868	7524100	8016800	7793300	7778100	142430		876935	934359	908310	16600.2	906535
869	7468600	7921300	7733200	7707700	131310		870466	923228	901305	15304.2	898333
870	7412800	7826500	7673000	7637400	120750		863963	912179	894289	14073.4	890144
871	7358300	7732400	7612700	7567800	110300		857611	901212	887261	12855.5	882028
872	7304600	7639000	7552300	7498600	100180		851352	890326	880221	11676	873967
873	7251600	7546300	7492000	7430000	90554		845175	879522	873193	10554.1	865963
874	7199200	7454400	7431700	7361800	81546		839068	868811	866166	9504.2	858015
875	7147500	7363400	7371300	7294100	73335		833042	858205	859126	8547.2	850124
876	7096400	7273100	7311000	7226800	66156		827086	847681	852098	7710.49	842288
877	7045900	7183800	7250800	7160200	60309		821200	837273	845082	7029.02	834518
878	6995900	7095300	7190600	7093900	56206		815373	826958	838065	6550.82	826799
879	6946900	7007700	7130500	7028400	54010		809662	816748	831061	6294.87	819157
880	6898500	6921100	7070500	6963400	53965		804021	806655	824068	6289.63	811581
881	6850600	6835600	7010700	6898900	56033		798438	796690	817098	6530.65	804075
882	6803600	6750800	6951000	6835100	59894		792960	786807	810140	6980.65	796636
883	6757400	6667200	6891400	6772000	65144		787576	777063	803193	7592.54	789277
884	6711900	6584600	6832000	6709500	71450		782273	767436	796270	8327.51	781993
885	6667200	6503000	6772900	6647700	78508		777063	757925	789382	9150.12	774790
886	6623200	6422500	6713900	6586500	86089		771935	748543	782506	10033.7	767661
887	6579900	6343100	6654700	6525900	93909		766888	739289	775606	10945.1	760594
888	6537400	6264800	6596300	6466200	102100		761935	730163	768800	11899.8	753632
889	6495600	6187700	6537900	6407100	110380		757063	721177	761993	12864.8	746744
890	6454500	6111600	6479900	6348700	118750		752273	712308	755233	13840.3	739938
891	6414300	6036600	6422300	6291100	127260		747587	703566	748520	14832.2	733225
892	6374900	5962800	6365100	6234300	135740		742995	694965	741853	15820.5	726605
893	6336300	5890300	6308200	6178200	144220		738497	686515	735221	16808.9	720078
894	6298400	5818800	6251700	6123000	152660		734079	678182	728636	17792.5	713632
895	6261300	5748500	6194600	6068100	160960		729755	669988	721981	18759.9	707242
896	6224900	5679400	6138900	6014400	169320		725513	661935	715490	19734.3	700979
897	6189300	5611600	6083400	5961400	177580		721364	654033	709021	20697	694806
898	6154500	5544900	6028500	5909300	185790		717308	646259	702622	21653.8	688730
899	6120500	5479400	5974000	5858000	193960		713345	638625	696270	22606.1	682747
900	6087300	5415100	5919900	5807400	202040		709476	631131	689965	23547.8	676857
901	6054900	5352000	5866100	5757700	210020		705699	623776	683695	24477.9	671057
902	6023300	5290300	5812900	5708800	217900		702016	616585	677494	25396.3	665365
903	5992300	5229600	5760200	5660700	225700		698403	609510	671352	26305.4	659755
904	5962100	5170200	5707800	5613400	233430		694883	602587	665245	27206.3	654239
905	5932800	5112000	5656000	5566900	241090		691469	595804	659207	28099.1	648827
906	5904100	5055000	5604800	5521300	248660		688124	589161	653240	28981.4	643508
907	5876300	4999100	5554000	5476500	256170		684883	582646	647319	29856.6	638283
908	5849200	4944400	5503700	5432500	263600		681725	576270	641457	30722.6	633151
909	5822900	4890900	5453900	5389200	270980		678660	570035	635653	31582.8	628116
910	5797100	4838600	5404700	5346800	278230		675653	563939	629918	32427.7	623170
911	5772300	4787500	5355900	5305200	285420		672762	557984	624231	33265.7	618326
912	5748100	4737500	5307700	5264400	292530		669942	552156	618613	34094.4	613570
913	5724700	4688600	5260000	5224400	299610		667214	546457	613054	34919.6	608908
914	5701900	4640900	5212900	5185200	306590		664557	540897	607564	35733.1	604340
915	5679800	4594300	5166300	5146800	313510		661981	535466	602133	36539.6	599860
916	5658400	4548900	5120200	5109200	320360		659487	530175	596760	37338	595474
917	5637800	4504600	5074700	5072400	327130		657086	525012	591457	38127	591185
918	5617800	4461400	5029800	5036300	333830		654755	519977	586224	38907.9	586985
919	5598500	4419300	4985300	5001000	340470		652506	515070	581037	39681.8	582871
920	5579800	4378400	4941500	4966600	347040		650326	510303	575932	40447.6	578854
921	5561700	4338400	4898300	4932800	353560		648217	505641	570897	41207.5	574918
922	5544300	4299500	4855500	4899800	360020		646189	501107	565909	41960.4	571068
923	5527500	4261600	4813300	4867500	366420		644231	496690	560991	42706.3	567304
924	5511200	4224800	4771700	4835900	372750		642331	492401	556142	43444.1	563625
925	5495500	4188800	4730700	4805000	379030		640501	488205	551364	44176	560023
926	5480500	4153900	4690200	4774900	385280		638753	484138	546643	44904.4	556511
927	5466000	4120000	4650400	4745500	391450		637063	480186	542005	45623.5	553085
928	5452100	4087000	4611000	4716700	397600		635443	476340	537413	46340.3	549732
929	5438800	4055000	4572200	4688700	403690		633893	472611	532890	47050.1	546465
930	5426000	4023700	4534000	4661200	409770		632401	468963	528438	47758.7	543267
931	5413700	3993500	4496300	4634500	415760		630967	465443	524044	48456.9	540152
932	5401900	3963400	4458900	4608100	421910		629592	461935	519685	49173.7	537071
933	5390600	3935000	4422300	4582600	427770		628275	458625	515420	49856.6	534106
934	5379600	3907400	4386200	4557700	433540		626993	455408	511212	50529.1	531204
935	5369200	3880700	4350500	4533400	439320		625781	452296	507051	51202.8	528376
936	5359300	3854700	4315400	4509800	445060		624627	449266	502960	51871.8	525618
937	5349800	3829500	4280900	4486700	450760		623520	446329	498939	52536.1	522929
938	5340700	3805200	4246900	4464200	456410		622459	443497	494977	53194.6	520311
939	5332000	3781500	4213300	4442300	462010		621445	440734	491061	53847.3	517747
940	5323800	3758600	4180300	4420900	467560		620490	438065	487214	54494.2	515256
941	5315800	3736400	4147700	4400000	473040		619557	435478	483415	55132.9	512817
942	5308200	3715000	4115600	4379600	478500		618671	432984	479674	55769.2	510443
943	5301000	3694200	4084100	4359700	483900		617832	430559	476002	56398.6	508131
944	5294100	3674000	4053000	4340400	489260		617028	428205	472378	57023.3	505870
945	5287500	3654500	4022300	4321500	494560		616259	425932	468800	57641	503664
946	5281200	3635500	3992100	4302900	499870		615524	423718	465280	58259.9	501507
947	5275200	3617200	3962400	4284900	505070		614825	421585	461818	58866	499409
948	5269400	3599600	3932900	4267300	510210		614149	419534	458380	59465	497354
949	5263900	3582500	3903900	4250100	515330		613508	417541	455000	60061.8	495350
950	5258600	3566000	3875500	4233400	520370		612890	415618	451690	60649.2	493399
951	5253600	3550000	3847500	4217000	525350		612308	413753	448427	61229.6	491496
952	5248700	3534500	3819900	4201000	530280		611737	411946	445210	61804.2	489631
953	5244000	3519500	3792700	4185400	535150		611189	410198	442040	62371.8	487809
954	5239500	3505000	3765700	4170100	540000		610664	408508	438893	62937.1	486022
955	5235200	3491000	3739300	4155200	544750		610163	406876	435816	63490.7	484285
956	5231100	3477500	3713200	4140600	549470		609685	405303	432774	64040.8	482587
957	5227000	3464300	3687500	4126300	554130		609207	403765	429779	64583.9	480917
958	5223100	3451600	3662200	4112300	558710		608753	402284	426830	65117.7	479289
959	5219200	3439300	3637200	4098600	563220		608298	400851	423916	65643.4	477688
960	5215500	3427500	3612600	4085200	567660		607867	399476	421049	66160.8	476131
961	5211700	3416000	3588200	4072000	572030		607424	398135	418205	66670.2	474588
962	5208000	3404900	3564300	4059000	576310		606993	396841	415420	67169	473085
963	5204400	3394000	3540700	4046300	580570		606573	395571	412669	67665.5	471605
964	5200800	3383500	3517300	4033900	584750		606154	394347	409942	68152.7	470148
965	5197200	3373300	3494300	4021600	588820		605734	393159	407261	68627	468718
966	5193600	3363400	3471600	4009500	592870		605315	392005	404615	69099.1	467312
967	5190000	3353700	3449100	3997600	596820		604895	390874	401993	69559.4	465921
968	5186400	3344400	3427000	3985900	600710		604476	389790	399417	70012.8	464561
969	5182800	3335400	3405100	3974400	604520		604056	388741	396865	70456.9	463221
970	5179000	3326600	3383500	3963000	608220		603613	387716	394347	70888.1	461892
971	5175000	3318000	3362100	3951700	611790		603147	386713	391853	71304.2	460571
972	5171200	3309700	3341000	3940600	615360		602704	385746	389394	71720.3	459281
973	5167300	3301500	3320000	3929600	618850		602249	384790	386946	72127	457995
974	5163300	3293600	3299400	3918800	622260		601783	383869	384545	72524.5	456733
975	5159100	3285900	3279000	3908000	625570		601294	382972	382168	72910.3	455478
976	5154900	3278300	3258800	3897300	628790		600804	382086	379814	73285.5	454235
977	5150500	3270900	3238900	3886800	631950		600291	381224	377494	73653.8	453003
978	5146000	3263600	3219100	3876300	635020		599767	380373	375186	74011.7	451775
979	5141300	3256500	3199400	3865800	638010		599219	379545	372890	74360.1	450552
980	5136500	3249500	3180100	3855300	640890		598660	378730	370641	74695.8	449343
981	5131500	3242600	3160800	3845000	643700		598077	377925	368392	75023.3	448131
982	5126400	3235800	3141800	3834700	646430		597483	377133	366177	75341.5	446931
983	5121000	3229100	3123100	3824400	649040		596853	376352	363998	75645.7	445734
984	5115500	3222500	3104500	3814200	651560		596212	375583	361830	75939.4	444542
985	5109800	3216100	3086000	3803900	653990		595548	374837	359674	76222.6	443353
986	5103800	3209400	3067700	3793700	656350		594848	374056	357541	76497.7	442148
987	5097600	3203100	3049700	3783500	658570		594126	373322	355443	76756.4	440963
988	5091200	3196800	3031700	3773300	660710		593380	372587	353345	77005.8	439771
989	5084600	3190600	3013900	3763000	662740		592611	371865	351270	77242.4	438582
990	5077700	3184400	2996300	3752800	664670		591807	371142	349219	77467.4	437389
991	5070600	3178200	2978800	3742500	666510		590979	370420	347179	77681.8	436193
992	5063200	3172000	2961400	3732200	668270		590117	369697	345152	77886.9	434988
993	5055500	3165900	2944200	3721900	669900		589219	368986	343147	78076.9	433784
994	5047600	3159700	2927000	3711400	671460		588298	368263	341142	78258.7	432568
995	5039400	3153500	2910000	3701000	672900		587343	367541	339161	78426.6	431348
996	5031000	3147300	2893200	3690500	674250		586364	366818	337203	78583.9	430128
997	5022300	3141200	2876500	3680000	675480		585350	366107	335256	78727.3	428904
998	5013200	3135000	2859800	3669300	676630		584289	365385	333310	78861.3	427661
999	5003900	3128800	2843300	3658700	677660		583205	364662	331387	78981.4	426418
1000	4994300	3122500	2827000	3647900	678570		582086	363928	329487	79087.4	425167
1001	4984400	3116300	2810700	3637100	679410		580932	363205	327587	79185.3	423908
1002	4974300	3109900	2794500	3626200	680130		579755	362459	325699	79269.2	422638
1003	4963800	3103600	2778500	3615300	680750		578531	361725	323834	79341.5	421364
1004	4952900	3097200	2762400	3604200	681270		577261	360979	321958	79402.1	420066
1005	4941100	3090700	2746600	3592800	681430		575886	360221	320117	79420.7	418741
1006	4929700	3084100	2730800	3581600	681750		574557	359452	318275	79458	417428
1007	4918100	3077500	2715200	3570300	681980		573205	358683	316457	79484.8	416115
1008	4906200	3070800	2699600	3558800	682120		571818	357902	314639	79501.2	414786
1009	4893900	3064000	2684100	3547300	682150		570385	357110	312832	79504.7	413442
1010	4881300	3057200	2668700	3535700	682060		568916	356317	311037	79494.2	412090
1011	4868400	3050200	2653400	3524000	681880		567413	355501	309254	79473.2	410723
1012	4855300	3043200	2638200	3512200	681610		565886	354685	307483	79441.7	409351
1013	4841800	3035300	2623100	3500100	681320		564312	353765	305723	79407.9	407933
1014	4828000	3028000	2608100	3488000	680860		562704	352914	303974	79354.3	406531
1015	4813800	3020800	2593200	3475900	680230		561049	352075	302238	79280.9	405120
1016	4799400	3013500	2578300	3463700	679550		559371	351224	300501	79201.6	403699
1017	4784700	3006000	2563400	3451400	678810		557657	350350	298765	79115.4	402257
1018	4769600	2998400	2548600	3438900	677930		555897	349464	297040	79012.8	400800
1019	4754300	2990700	2533900	3426300	676980		554114	348566	295326	78902.1	399336
1020	4738700	2982900	2519400	3413700	675910		552296	347657	293636	78777.4	397863
1021	4722800	2975000	2504900	3400900	674740		550443	346737	291946	78641	396375
1022	4706600	2967000	2490500	3388000	673490		548555	345804	290268	78495.3	394876
1023	4690000	2958800	2476100	3375000	672120		546620	344848	288590	78335.7	393353
1024	4673200	2950500	2461800	3361900	670690		544662	343881	286923	78169	391822
1025	4656200	2942100	2447700	3348700	669160		542681	342902	285280	77990.7	390287
1026	4638800	2933600	2433600	3335300	667530		540653	341911	283636	77800.7	388733
1027	4621100	2925000	2419500	3321900	665820		538590	340909	281993	77601.4	387164
1028	4603200	2916200	2405500	3308300	664020		536503	339883	280361	77391.6	385583
1029	4585000	2907200	2391700	3294600	662130		534382	338834	278753	77171.3	383990
1030	4566600	2898200	2377900	3280900	660150		532238	337786	277145	76940.6	382389
1031	4547800	2889100	2364200	3267000	658090		530047	336725	275548	76700.5	380773
1032	4528800	2879800	2350500	3253100	655930		527832	335641	273951	76448.7	379141
1033	4509600	2870400	2336900	3239000	653720		525594	334545	272366	76191.1	377502
1034	4490100	2860900	2323400	3224800	651390		523322	333438	270793	75919.6	375851
1035	4470400	2851200	2310000	3210500	649000		521026	332308	269231	75641	374188
1036	4450400	2841400	2296700	3196200	646540		518695	331166	267681	75354.3	372514
1037	4430200	2831500	2283400	3181700	643990		516340	330012	266131	75057.1	370828
1038	4409800	2821400	2270200	3167100	641370		513963	328834	264592	74751.7	369130
1039	4389100	2811300	2257100	3152500	638660		511550	327657	263065	74435.9	367424
1040	4368200	2801000	2244000	3137700	635890		509114	326457	261538	74113.1	365703
1041	4347100	2789600	2231000	3122500	633140		506655	325128	260023	73792.5	363936
1042	4325800	2779100	2218100	3107600	630220		504172	323904	258520	73452.2	362199
1043	4304200	2768500	2205200	3092600	627250		501655	322669	257016	73106.1	360447
1044	4282500	2757700	2192400	3077500	624210		499126	321410	255524	72751.7	358687
1045	4260600	2746800	2179700	3062400	621080		496573	320140	254044	72386.9	356919
1046	4238500	2735700	2167100	3047100	617900		493998	318846	252576	72016.3	355140
1047	4216100	2724600	2154500	3031800	614630		491387	317552	251107	71635.2	353349
1048	4193700	2713300	2142100	3016400	611310		488776	316235	249662	71248.3	351558
1049	4171000	2702000	2129600	3000900	607950		486131	314918	248205	70856.6	349751
1050	4148200	2690500	2117400	2985400	604490		483473	313578	246783	70453.4	347945
1051	4125200	2678900	2105200	2969800	600990		480793	312226	245361	70045.5	346127
1052	4102100	2667100	2093000	2954100	597450		478100	310851	243939	69632.9	344297
1053	4078800	2655200	2081000	2938300	593850		475385	309464	242541	69213.3	342463
1054	4055400	2643300	2068900	2922500	590180		472657	308077	241131	68785.5	340622
1055	4031800	2631200	2057000	2906700	586470		469907	306667	239744	68353.1	338772
1056	4008000	2619000	2045100	2890700	582710		467133	305245	238357	67914.9	336911
1057	3984100	2606800	2033300	2874700	578880		464347	303823	236981	67468.5	335051
1058	3960100	2594400	2021300	2858600	575060		461550	302378	235583	67023.3	333170
1059	3936100	2582000	2009700	2842600	571150		458753	300932	234231	66567.6	331305
1060	3911900	2569500	1998200	2826500	567190		455932	299476	232890	66106.1	329433
1061	3887400	2556900	1986700	2810300	563130		453077	298007	231550	65632.9	327545
1062	3863100	2544100	1975200	2794100	559130		450245	296515	230210	65166.7	325657
1063	3838600	2531300	1963900	2777900	555050		447389	295023	228893	64691.1	323768
1064	3814100	2518400	1952700	2761700	550930		444534	293520	227587	64211	321880
1065	3789400	2505400	1941200	2745400	546850		441655	292005	226247	63735.4	319969
1066	3764700	2492400	1930100	2729000	542660		438776	290490	224953	63247.1	318073
1067	3739800	2479300	1919100	2712700	538400		435874	288963	223671	62750.6	316169
1068	3714900	2466100	1908100	2696400	534140		432972	287424	222389	62254.1	314262
1069	3690000	2452900	1897200	2680100	529850		430070	285886	221119	61754.1	312358
1070	3665100	2439500	1886400	2663700	525530		427168	284324	219860	61250.6	310451
1071	3640100	2426200	1875700	2647300	521190		424254	282774	218613	60744.8	308547
1072	3615000	2412800	1865100	2631000	516800		421329	281212	217378	60233.1	306639
1073	3589900	2399300	1854600	2614600	512390		418403	279639	216154	59719.1	304732
1074	3564800	2385800	1844100	2598200	507950		415478	278065	214930	59201.6	302824
1075	3539600	2372300	1833700	2581900	503480		412541	276492	213718	58680.7	300917
1076	3514400	2358700	1823400	2565500	498980		409604	274907	212517	58156.2	299009
1077	3489200	2345100	1813200	2549200	494470		406667	273322	211329	57630.5	297106
1078	3464000	2331400	1803000	2532800	489950		403730	271725	210140	57103.7	295198
1079	3438800	2317700	1792900	2516500	485410		400793	270128	208963	56574.6	293294
1080	3413600	2304000	1782900	2500100	480850		397855	268531	207797	56043.1	291395
1081	3388400	2290200	1772900	2483900	476280		394918	266923	206632	55510.5	289491
1082	3363100	2276500	1763100	2467600	471670		391970	265326	205490	54973.2	287595
1083	3337900	2262800	1753300	2451300	467070		389033	263730	204347	54437.1	285703
1084	3312700	2249000	1743500	2435100	462460		386096	262121	203205	53899.8	283807
1085	3287600	2235200	1733800	2418900	457840		383170	260513	202075	53361.3	281919
1086	3262300	2221500	1724200	2402700	453160		380221	258916	200956	52815.9	280031
1087	3237200	2207700	1714700	2386500	448520		377296	257308	199848	52275.1	278151
1088	3212200	2193900	1705300	2370500	443870		374382	255699	198753	51733.1	276278
1089	3187000	2180100	1695900	2354300	439180		371445	254091	197657	51186.5	274398
1090	3162100	2166400	1686500	2338300	434540		368543	252494	196562	50645.7	272533
1091	3137100	2152700	1677300	2322400	429880		365629	250897	195490	50102.6	270672
1092	3112200	2139000	1668100	2306400	425210		362727	249301	194417	49558.3	268815
1093	3087400	2125300	1659000	2290600	420540		359837	247704	193357	49014	266966
1094	3062600	2111700	1650000	2274700	415850		356946	246119	192308	48467.4	265124
1095	3037900	2098100	1641000	2259000	411200		354068	244534	191259	47925.4	263287
1096	3013200	2084500	1632100	2243300	406530		351189	242949	190221	47381.1	261453
1097	2988700	2071000	1623300	2227600	401860		348333	241375	189196	46836.8	259635
1098	2964200	2057400	1614500	2212000	397200		345478	239790	188170	46293.7	257813
1099	2939700	2044000	1605800	2196500	392540		342622	238228	187156	45750.6	256002
1100	2915300	2030600	1597200	2181000	387870		339779	236667	186154	45206.3	254200
1101	2891100	2017300	1588700	2165700	383220		336958	235117	185163	44664.3	252413
1102	2866900	2004000	1580200	2150400	378580		334138	233566	184172	44123.5	250625
1103	2842800	1990800	1571700	2135100	373930		331329	232028	183182	43581.6	248846
1104	2818800	1977700	1563400	2119900	369310		328531	230501	182214	43043.1	247082
1105	2794900	1964600	1555000	2104800	364710		325746	228974	181235	42507	245319
1106	2771100	1951600	1546700	2089800	360130		322972	227459	180268	41973.2	243566
1107	2747300	1938600	1538600	2074900	355530		320198	225944	179324	41437.1	241822
1108	2723700	1925800	1530500	2060000	350950		317448	224452	178380	40903.3	240093
1109	2700200	1913000	1522400	2045200	346370		314709	222960	177436	40369.5	238368
1110	2676900	1900300	1514500	2030600	341810		311993	221480	176515	39838	236663
1111	2653600	1887700	1506600	2016000	337270		309277	220012	175594	39308.9	234961
1112	2630400	1875200	1498700	2001400	332740		306573	218555	174674	38780.9	233267
1113	2607400	1862800	1490900	1987000	328220		303893	217110	173765	38254.1	231589
1114	2584400	1850500	1483200	1972700	323720		301212	215676	172867	37729.6	229918
1115	2561600	1838300	1475500	1958500	319240		298555	214254	171970	37207.5	228260
1116	2538900	1826100	1467900	1944300	314770		295909	212832	171084	36686.5	226608
1117	2516400	1814100	1460400	1930300	310330		293287	211434	170210	36169	224977
1118	2493900	1802200	1452900	1916300	305900		290664	210047	169336	35652.7	223349
1119	2471600	1790400	1445400	1902500	301490		288065	208671	168462	35138.7	221733
1120	2449400	1778700	1438100	1888700	297100		285478	207308	167611	34627	220132
1121	2427400	1767100	1430700	1875100	292730		282914	205956	166748	34117.7	218539
1122	2405500	1755700	1423500	1861500	288390		280361	204627	165909	33611.9	216966
1123	2383700	1744300	1416200	1848100	284080		277821	203298	165058	33109.6	215392
1124	2362100	1733100	1409000	1834700	279770		275303	201993	164219	32607.2	213838
1125	2340600	1722000	1401900	1821500	275490		272797	200699	163392	32108.4	212296
1126	2319200	1711000	1394900	1808400	271230		270303	199417	162576	31611.9	210765
1127	2298000	1700100	1387900	1795300	267000		267832	198147	161760	31118.9	209246
1128	2276900	1689400	1381000	1782400	262790		265373	196900	160956	30628.2	207743
1129	2256000	1678800	1374100	1769600	258600		262937	195664	160152	30139.9	206251
1130	2235200	1668300	1367300	1756900	254440		260513	194441	159359	29655	204771
1131	2214600	1657900	1360400	1744300	250320		258112	193228	158555	29174.8	203298
1132	2194100	1647700	1353700	1731800	246210		255723	192040	157774	28695.8	201845
1133	2173600	1637600	1347000	1719400	242090		253333	190862	156993	28215.6	200396
1134	2153400	1627700	1340400	1707200	238040		250979	189709	156224	27743.6	198970
1135	2133400	1617900	1333800	1695000	234020		248648	188566	155455	27275.1	197556
1136	2113500	1608200	1327200	1683000	230040		246329	187436	154685	26811.2	196150
1137	2093700	1598600	1320800	1671000	226040		244021	186317	153939	26345	194759
1138	2074100	1589100	1314300	1659200	222110		241737	185210	153182	25886.9	193376
1139	2054700	1579900	1308000	1647500	218210		239476	184138	152448	25432.4	192020
1140	2035500	1570700	1301600	1635900	214340		237238	183065	151702	24981.4	190668
1141	2016400	1561700	1295300	1624500	210490		235012	182016	150967	24532.6	189332
1142	1997400	1552900	1289100	1613100	206680		232797	180991	150245	24088.6	188011
1143	1978600	1544100	1282900	1601900	202900		230606	179965	149522	23648	186698
1144	1960000	1535600	1276800	1590800	199160		228438	178974	148811	23212.1	185408
1145	1941500	1527100	1270700	1579800	195450		226282	177984	148100	22779.7	184122
1146	1923200	1518800	1264600	1568900	191770		224149	177016	147389	22350.8	182852
1147	1905100	1510600	1258600	1558100	188130		222040	176061	146690	21926.6	181597
1148	1887100	1502600	1252600	1547400	184520		219942	175128	145991	21505.8	180354
1149	1869300	1494700	1246700	1536900	180950		217867	174207	145303	21089.7	179126
1150	1851600	1487000	1240800	1526400	177420		215804	173310	144615	20678.3	177910
1151	1834100	1479400	1235000	1516100	173920		213765	172424	143939	20270.4	176709
1152	1816700	1471900	1229200	1505900	170470		211737	171550	143263	19868.3	175517
1153	1799500	1464500	1223400	1495800	167050		209732	170688	142587	19469.7	174336
1154	1782500	1457300	1217700	1485800	163680		207751	169848	141923	19076.9	173174
1155	1765600	1450300	1212000	1476000	160340		205781	169033	141259	18687.6	172024
1156	1748900	1443300	1206400	1466200	157050		203834	168217	140606	18304.2	170886
1157	1732400	1436500	1200800	1456600	153800		201911	167424	139953	17925.4	169763
1158	1716000	1429800	1195200	1447000	150590		200000	166643	139301	17551.3	168648
1159	1699800	1423300	1189700	1437600	147430		198112	165886	138660	17183	167552
1160	1683800	1416900	1184200	1428300	144310		196247	165140	138019	16819.3	166469
1161	1667900	1410600	1178800	1419100	141250		194394	164406	137389	16462.7	165396
1162	1652100	1404500	1173400	1410000	138230		192552	163695	136760	16110.7	164336
1163	1636600	1398500	1168000	1401000	135260		190746	162995	136131	15764.6	163291
1164	1621200	1392600	1162700	1392100	132350		188951	162308	135513	15425.4	162257
1165	1605900	1386800	1157400	1383400	129480		187168	161632	134895	15090.9	161232
1166	1590900	1381100	1152200	1374700	126680		185420	160967	134289	14764.6	160225
1167	1575900	1375600	1147000	1366200	123920		183671	160326	133683	14442.9	159227
1168	1561200	1370200	1141800	1357700	121230		181958	159697	133077	14129.4	158244
1169	1546600	1364900	1136600	1349400	118600		180256	159079	132471	13822.8	157269
1170	1532200	1359700	1131500	1341100	116020		178578	158473	131876	13522.1	156309
1171	1517800	1354600	1126500	1333000	113500		176900	157879	131294	13228.4	155357
1172	1503700	1349600	1121400	1324900	111050		175256	157296	130699	12942.9	154417
1173	1489800	1344800	1116400	1317000	108670		173636	156737	130117	12665.5	153497
1174	1476000	1339900	1111400	1309100	106360		172028	156166	129534	12396.3	152576
1175	1462400	1335300	1106500	1301400	104120		170443	155629	128963	12135.2	151678
1176	1448900	1330800	1101500	1293700	102000		168869	155105	128380	11888.1	150785
1177	1435500	1326400	1096500	1286100	99902		167308	154592	127797	11643.6	149899
1178	1422400	1322100	1091700	1278700	97884		165781	154091	127238	11408.4	149037
1179	1409400	1317900	1086900	1271400	95945		164266	153601	126678	11182.4	148182
1180	1396500	1313800	1082100	1264200	94087		162762	153124	126119	10965.9	147335
1181	1383900	1309700	1077400	1257000	92311		161294	152646	125571	10758.9	146503
1182	1371400	1305800	1072700	1249900	90639		159837	152191	125023	10564	145684
1183	1359000	1302000	1068000	1243000	89032		158392	151748	124476	10376.7	144872
1184	1346800	1298200	1063300	1236100	87534		156970	151305	123928	10202.1	144068
1185	1334700	1294500	1058700	1229300	86090		155559	150874	123392	10033.8	143275
1186	1322800	1290900	1054100	1222600	84741		154172	150455	122855	9876.57	142494
1187	1311100	1287400	1049600	1216000	83493		152809	150047	122331	9731.12	141729
1188	1299500	1283900	1045100	1209500	82338		151457	149639	121807	9596.5	140967
1189	1288000	1280600	1040600	1203100	81276		150117	149254	121282	9472.73	140218
1190	1276800	1277300	1036100	1196700	80306		148811	148869	120758	9359.67	139479
1191	1265600	1274100	1031700	1190500	79431		147506	148497	120245	9257.69	138749
1192	1254700	1270900	1027300	1184300	78647		146235	148124	119732	9166.32	138030
1193	1243800	1267900	1022900	1178200	77957		144965	147774	119219	9085.9	137319
1194	1233200	1264900	1018600	1172200	77357		143730	147424	118718	9015.97	136624
1195	1222600	1261900	1014300	1166300	76847		142494	147075	118217	8956.53	135929
1196	1212300	1259000	1010000	1160400	76425		141294	146737	117716	8907.34	135249
1197	1202000	1256200	1005700	1154600	76089		140093	146410	117214	8868.18	134573
1198	1192000	1253400	1001500	1148900	75837		138928	146084	116725	8838.81	133912
1199	1182000	1250700	997260	1143300	75665		137762	145769	116231	8818.76	133254
1200	1172200	1248000	993080	1137800	75572		136620	145455	115744	8807.93	132606
1201	1162600	1245300	988930	1132300	75553		135501	145140	115260	8805.71	131967
1202	1153100	1242700	984800	1126900	75605		134394	144837	114779	8811.77	131336
1203	1143700	1240200	980700	1121500	75725		133298	144545	114301	8825.76	130715
1204	1134500	1237700	976630	1116300	75909		132226	144254	113826	8847.2	130102
1205	1125400	1235200	972580	1111100	76153		131166	143963	113354	8875.64	129494
1206	1116500	1232800	968560	1105900	76453		130128	143683	112886	8910.61	128899
1207	1107700	1230400	964560	1100900	76805		129103	143403	112420	8951.63	128308
1208	1099000	1227900	960590	1095800	77190		128089	143112	111957	8996.5	127719
1209	1090500	1225600	956640	1090900	77635		127098	142844	111497	9048.37	127146
1210	1082100	1223300	952720	1086000	78121		126119	142576	111040	9105.01	126578
1211	1073900	1221000	948830	1081200	78643		125163	142308	110586	9165.85	126019
1212	1065800	1218700	944960	1076500	79198		124219	142040	110135	9230.54	125465
1213	1057700	1216400	941110	1071700	79784		123275	141772	109686	9298.83	124911
1214	1049900	1214200	937290	1067100	80393		122366	141515	109241	9369.81	124374
1215	1042100	1211900	933500	1062500	81025		121457	141247	108800	9443.47	123834
1216	1034600	1209700	929730	1058000	81675		120583	140991	108360	9519.23	123311
1217	1027100	1207500	925980	1053500	82340		119709	140734	107923	9596.74	122789
1218	1019700	1205300	922260	1049100	83021		118846	140478	107490	9676.11	122271
1219	1012500	1203100	918570	1044700	83711		118007	140221	107059	9756.53	121763
1220	1005400	1200900	914890	1040400	84405		117179	139965	106631	9837.41	121258
1221	998480	1198700	911240	1036200	85103		116373	139709	106205	9918.76	120762
1222	991660	1196500	907620	1031900	85803		115578	139452	105783	10000.3	120271
1223	984970	1194400	903970	1027800	86514		114798	139207	105358	10083.2	119788
1224	978390	1192200	900350	1023600	87220		114031	138951	104936	10165.5	119306
1225	971940	1189900	896800	1019600	87909		113280	138683	104522	10245.8	118828
1226	965530	1187700	893280	1015500	88598		112533	138427	104112	10326.1	118357
1227	959070	1185400	889780	1011400	89277		111780	138159	103704	10405.2	117881
1228	952990	1183200	886300	1007500	89922		111071	137902	103298	10480.4	117424
1229	947020	1180900	882760	1003600	90592		110375	137634	102886	10558.5	116965
1230	941160	1178600	879340	999710	91228		109692	137366	102487	10632.6	116515
1231	935410	1176400	875940	995900	91849		109022	137110	102091	10705	116074
1232	929780	1174100	872560	992130	92453		108366	136841	101697	10775.4	115635
1233	924250	1171700	869140	988380	93054		107721	136562	101298	10845.5	115194
1234	918830	1169400	865800	984680	93620		107090	136294	100909	10911.4	114764
1235	913520	1167000	862500	981010	94166		106471	136014	100524	10975.1	114336
1236	908310	1164600	859210	977380	94691		105864	135734	100141	11036.2	113913
1237	903210	1162200	855950	973790	95194		105269	135455	99761.1	11094.9	113495
1238	898200	1159800	852710	970220	95673		104685	135175	99383.4	11150.7	113081
1239	893300	1157300	849490	966690	96129		104114	134883	99008.2	11203.8	112669
1240	888500	1154800	846300	963190	96559		103555	134592	98636.4	11254	112261
1241	883750	1152200	843130	959700	96972		103001	134289	98266.9	11302.1	111852
1242	879060	1149600	839980	956220	97361		102455	133986	97899.8	11347.4	111447
1243	874470	1147000	836850	952780	97725		101920	133683	97535	11389.9	111046
1244	870070	1144400	833740	949390	98048		101407	133380	97172.5	11427.5	110653
1245	865760	1141700	830660	946030	98344		100904	133065	96813.5	11462	110261
1246	861540	1138900	827600	942700	98612		100413	132739	96456.9	11493.2	109869
1247	857410	1136200	824570	939380	98851		99931.2	132424	96103.7	11521.1	109486
1248	853360	1133400	821550	936090	99061		99459.2	132098	95751.7	11545.6	109103
1249	849410	1130500	818560	932830	99242		98998.8	131760	95403.3	11566.7	108721
1250	845530	1127600	815550	929560	99401		98546.6	131422	95052.4	11585.2	108340
1251	841740	1124700	812600	926340	99522		98104.9	131084	94708.6	11599.3	107966
1252	838040	1121700	809680	923130	99612		97673.7	130734	94368.3	11609.8	107592
1253	834410	1118700	806790	919950	99672		97250.6	130385	94031.5	11616.8	107222
1254	830860	1115600	803910	916780	99701		96836.8	130023	93695.8	11620.2	106852
1255	827390	1112400	801000	913600	99694		96432.4	129650	93356.6	11619.3	106480
1256	823990	1109200	798180	910470	99662		96036.1	129277	93028	11615.6	106114
1257	820670	1106000	795370	907360	99599		95649.2	128904	92700.5	11608.3	105751
1258	817430	1102700	792590	904260	99505		95271.6	128520	92376.5	11597.3	105389
1259	814250	1099400	789830	901170	99380		94900.9	128135	92054.8	11582.8	105030
1260	811140	1096100	787100	898100	99224		94538.5	127751	91736.6	11564.6	104675
1261	808110	1092600	784380	895040	99036		94185.3	127343	91419.6	11542.7	104316
1262	805140	1089200	781650	891980	98827		93839.2	126946	91101.4	11518.3	103962
1263	802230	1085700	778980	888950	98577		93500	126538	90790.2	11489.2	103610
1264	799390	1082100	776340	885930	98297		93169	126119	90482.5	11456.5	103257
1265	796610	1078400	773720	882930	97985		92845	125688	90177.2	11420.2	102903
1266	793890	1074800	771120	879930	97643		92528	125268	89874.1	11380.3	102557
1267	791230	1071000	768550	876940	97270		92217.9	124825	89574.6	11336.8	102206
1268	788630	1067300	766000	873960	96867		91914.9	124394	89277.4	11289.9	101862
1269	786080	1063400	763470	870990	96434		91617.7	123939	88982.5	11239.4	101513
1270	783590	1059500	760960	868020	95971		91327.5	123485	88690	11185.4	101167
1271	781090	1055600	758480	865050	95487		91036.1	123030	88400.9	11129	100822
1272	778700	1051600	756020	862100	94963		90757.6	122564	88114.2	11067.9	100479
1273	776370	1047500	753580	859160	94411		90486	122086	87829.8	11003.6	100134
1274	774080	1043400	751170	856220	93829		90219.1	121608	87549	10935.8	99792.2
1275	771850	1039300	748780	853290	93218		89959.2	121131	87270.4	10864.6	99453.4
1276	769650	1035000	746410	850370	92578		89702.8	120629	86994.2	10790	99108.8
1277	767500	1030800	744070	847450	91911		89452.2	120140	86721.4	10712.2	98771.2
1278	765400	1026400	741750	844530	91215		89207.5	119627	86451	10631.1	98428.5
1279	763330	1022100	739450	841620	90491		88966.2	119126	86183	10546.7	98091.7
1280	761300	1017600	737170	838710	89740		88729.6	118601	85917.2	10459.2	97749.4
1281	759310	1013100	734920	835780	88936		88497.7	118077	85655	10365.5	97409.9
1282	757360	1008600	732700	832870	88132		88270.4	117552	85396.3	10271.8	97073
1283	755380	1004000	730490	829950	87311		88039.6	117016	85138.7	10176.1	96731.5
1284	753500	999350	728310	827050	86454		87820.5	116474	84884.6	10076.2	96393.2
1285	751650	994660	726150	824160	85572		87604.9	115928	84632.9	9973.43	96055.2
1286	749710	989870	723970	821180	84669		87378.8	115369	84378.8	9868.18	95709
1287	747930	985090	721860	818290	83735		87171.3	114812	84132.9	9759.32	95372.2
1288	746180	980250	719770	815400	82777		86967.4	114248	83889.3	9647.67	95035
1289	744460	975370	717710	812510	81794		86766.9	113679	83649.2	9533.1	94698.5
1290	742760	970440	715670	809620	80788		86568.8	113105	83411.4	9415.85	94361.7
1291	741080	965290	713650	806670	79703		86373	112505	83176	9289.39	94017.9
1292	739430	960270	711660	803790	78653		86180.7	111920	82944.1	9167.02	93681.4
1293	737790	955200	709690	800890	77581		85989.5	111329	82714.5	9042.07	93344.2
1294	736180	950090	707740	798000	76485		85801.9	110733	82487.2	8914.34	93007.4
1295	734590	944930	705810	795110	75368		85616.6	110132	82262.2	8784.15	92670.2
1296	733010	939720	703910	792210	74229		85432.4	109524	82040.8	8651.4	92332.6
1297	731450	934460	702030	789310	73069		85250.6	108911	81821.7	8516.2	91994.6
1298	729910	929160	700170	786410	71889		85071.1	108294	81604.9	8378.67	91656.6
1299	728380	923820	698340	783510	70688		84892.8	107671	81391.6	8238.69	91318.6
1300	726860	918430	696530	780610	69468		84715.6	107043	81180.7	8096.5	90979.8
1301	725350	913000	694740	777700	68228		84539.6	106410	80972	7951.98	90640.6
1302	723860	907530	692970	774790	66969		84366	105773	80765.7	7805.24	90301.5
1303	722370	902020	691220	771870	65692		84192.3	105131	80561.8	7656.41	89961.5
1304	720900	896470	689430	768930	64413		84021	104484	80353.1	7507.34	89619.3
1305	719430	890880	687730	766010	63099		83849.7	103832	80155	7354.2	89278.9
1306	717970	885250	686060	763090	61769		83679.5	103176	79960.4	7199.18	88938.6
1307	716470	879540	684410	760140	60413		83504.7	102510	79768.1	7041.14	88594.4
1308	714970	873840	682770	757190	59057		83329.8	101846	79576.9	6883.1	88251
1309	713450	868100	681170	754240	57688		83152.7	101177	79390.4	6723.54	87906.8
1310	712020	862330	679580	751310	56294		82986	100505	79205.1	6561.07	87565.3
1311	710580	856520	678010	748370	54886		82818.2	99827.5	79022.1	6396.97	87222.6
1312	709110	850680	676470	745420	53469		82646.9	99146.9	78842.7	6231.82	86878.8
1313	707670	844810	674940	742480	52033		82479	98462.7	78664.3	6064.45	86535.4
1314	706140	838910	673440	739500	50595		82300.7	97775.1	78489.5	5896.85	86188.4
1315	704710	832930	671960	736530	49116		82134	97078.1	78317	5724.48	85843
1316	703280	826970	670500	733580	47643		81967.4	96383.4	78146.9	5552.8	85499.2
1317	701840	820980	669050	730630	46159		81799.5	95685.3	77977.9	5379.84	85154.2
1318	700400	814970	667630	727670	44664		81631.7	94984.8	77812.4	5205.59	84809.6
1319	698960	808930	666230	724710	43159		81463.9	94280.9	77649.2	5030.19	84464.6
1320	697510	802870	664850	721740	41644		81294.9	93574.6	77488.3	4853.61	84119.3
1321	695990	796780	663490	718750	40126		81117.7	92864.8	77329.8	4676.69	83770.8
1322	694530	790560	662150	715750	38559		80947.6	92139.9	77173.7	4494.06	83420.4
1323	693060	784440	660820	712770	37021		80776.2	91426.6	77018.6	4314.8	83073.8
1324	691540	778290	659520	709780	35479		80599.1	90709.8	76867.1	4135.08	82725.3
1325	690050	772120	658230	706800	33926		80425.4	89990.7	76716.8	3954.08	82377.6
1326	688560	765930	656970	703820	32368		80251.7	89269.2	76569.9	3772.49	82030.3
1327	687060	759730	655720	700830	30805		80076.9	88546.6	76424.2	3590.33	81682.6
1328	685550	753500	654480	697840	29238		79900.9	87820.5	76279.7	3407.69	81333.7
1329	684020	747220	653270	694840	27654		79722.6	87088.6	76138.7	3223.08	80983.3
1330	682490	740970	652070	691840	26084		79544.3	86360.1	75998.8	3040.09	80634.4
1331	680940	734700	650900	688850	24513		79363.6	85629.4	75862.5	2856.99	80285.2
1332	679380	728420	649730	685850	22945		79181.8	84897.4	75726.1	2674.24	79935.1
1333	677810	722130	648590	682850	21380		78998.8	84164.3	75593.2	2491.84	79585.5
1334	676230	715830	647460	679840	19821		78814.7	83430.1	75461.5	2310.14	79235.4
1335	674640	709520	646340	676830	18272		78629.4	82694.6	75331	2129.6	78885
1336	673030	703210	645180	673800	16755		78441.7	81959.2	75195.8	1952.8	78532.2
1337	671340	696880	644100	670770	15239		78244.8	81221.4	75069.9	1776.11	78178.7
1338	669710	690550	643040	667760	13750		78054.8	80483.7	74946.4	1602.56	77828.3
1339	668060	684210	641990	664750	12301		77862.5	79744.8	74824	1433.68	77477.1
1340	666400	677870	640950	661740	10909		77669	79005.8	74702.8	1271.45	77125.9
1341	664730	671530	639930	658730	9601.9		77474.4	78266.9	74583.9	1119.1	76775.1
1342	663040	665180	638870	655700	8436.3		77277.4	77526.8	74460.4	983.252	76421.5
1343	661340	658830	637880	652680	7438.3		77079.3	76786.7	74345	866.935	76070.3
1344	659620	652480	636900	649670	6709.8		76878.8	76046.6	74230.8	782.028	75718.7
1345	657890	646140	635930	646650	6345.1		76677.2	75307.7	74117.7	739.522	75367.5
1346	656140	639790	634970	643640	6406.8		76473.2	74567.6	74005.8	746.713	75015.5
1347	654380	633450	634030	640620	6883		76268.1	73828.7	73896.3	802.214	74664.3
1348	652610	627120	633090	637610	7696.8		76061.8	73090.9	73786.7	897.063	74313.1
1349	650820	620780	632170	634590	8753.7		75853.1	72352	73679.5	1020.24	73961.5
1350	649010	614460	631260	631580	9975.9		75642.2	71615.4	73573.4	1162.69	73610.3
1351	647190	608140	630350	628560	11309		75430.1	70878.8	73467.4	1318.07	73258.7
1352	645360	601830	629460	625550	12717		75216.8	70143.4	73363.6	1482.17	72907.9
1353	643510	595530	628570	622540	14176		75001.2	69409.1	73259.9	1652.21	72556.7
1354	641650	589240	627700	619530	15671		74784.4	68676	73158.5	1826.46	72206.3
1355	639770	582960	626830	616520	17191		74565.3	67944.1	73057.1	2003.61	71855.5
1356	637880	576690	625970	613510	18729		74345	67213.3	72956.9	2182.87	71505.1
1357	635970	570440	625120	610510	20280		74122.4	66484.8	72857.8	2363.64	71155
1358	634050	564190	624270	607510	21839		73898.6	65756.4	72758.7	2545.34	70804.6
1359	632120	557970	623380	604490	23397		73673.7	65031.5	72655	2726.92	70453.4
1360	630170	551760	622550	601490	24965		73446.4	64307.7	72558.3	2909.67	70104.1
1361	628210	545560	621730	598500	26535		73217.9	63585.1	72462.7	3092.66	69755.2
1362	626240	539390	620910	595510	28104		72988.3	62866	72367.1	3275.52	69407.1
1363	624250	533230	620100	592530	29672		72756.4	62148	72272.7	3458.28	69059.1
1364	622250	527090	619280	589540	31238		72523.3	61432.4	72177.2	3640.79	68711
1365	620240	520970	618480	586560	32800		72289	60719.1	72083.9	3822.84	68364
1366	618150	514880	617670	583570	34346		72045.5	60009.3	71989.5	4003.03	68014.8
1367	616120	508800	616870	580600	35900		71808.9	59300.7	71896.3	4184.15	67668.6
1368	614080	502750	616080	577630	37448		71571.1	58595.6	71804.2	4364.57	67323.6
1369	612020	496720	615280	574670	38989		71331	57892.8	71711	4544.17	66978.2
1370	609960	490660	614490	571700	40543		71090.9	57186.5	71618.9	4725.29	66632.1
1371	607880	484680	613690	568750	42070		70848.5	56489.5	71525.6	4903.26	66287.9
1372	605790	478730	612850	565790	43579		70604.9	55796	71427.7	5079.14	65942.9
1373	603690	472800	612060	562850	45090		70360.1	55104.9	71335.7	5255.24	65600.2
1374	601580	466900	611270	559920	46592		70114.2	54417.2	71243.6	5430.3	65258.4
1375	599470	461030	610480	556990	48085		69868.3	53733.1	71151.5	5604.31	64917.6
1376	597340	455130	609690	554050	49591		69620	53045.5	71059.4	5779.84	64575
1377	595200	449320	608900	551140	51064		69370.6	52368.3	70967.4	5951.52	64235.4
1378	593000	443540	608100	548210	52518		69114.2	51694.6	70874.1	6120.98	63894.3
1379	590850	437790	607310	545310	53972		68863.6	51024.5	70782.1	6290.44	63556.7
1380	588690	432070	606510	542420	55414		68611.9	50357.8	70688.8	6458.51	63219.5
1381	586520	426390	605700	539540	56846		68359	49695.8	70594.4	6625.41	62883.1
1382	584350	420730	604900	536660	58266		68106.1	49036.1	70501.2	6790.91	62547.8
1383	582170	415110	604080	533790	59674		67852	48381.1	70405.6	6955.01	62212.9
1384	579990	409530	603270	530930	61071		67597.9	47730.8	70311.2	7117.83	61880
1385	577800	403980	602450	528070	62456		67342.7	47083.9	70215.6	7279.25	61547.4
1386	575600	398460	601620	525230	63828		67086.2	46440.6	70118.9	7439.16	61215.2
1387	573400	392980	600790	522390	65187		66829.8	45801.9	70022.1	7597.55	60884.6
1388	571190	387530	599960	519560	66534		66572.3	45166.7	69925.4	7754.55	60554.8
1389	568970	382120	599110	516740	67867		66313.5	44536.1	69826.3	7909.91	60225.3
1390	566760	376750	598260	513920	69187		66055.9	43910.3	69727.3	8063.75	59897.8
1391	564540	371410	597400	511120	70493		65797.2	43287.9	69627	8215.97	59570.7
1392	562310	366120	596540	508320	71786		65537.3	42671.3	69526.8	8366.67	59245.1
1393	560090	360860	595660	505540	73064		65278.6	42058.3	69424.2	8515.62	58920.4
1394	557860	355640	594780	502760	74328		65018.6	41449.9	69321.7	8662.94	58596.7
1395	555630	350460	593890	499990	75578		64758.7	40846.2	69217.9	8808.62	58274.3
1396	553390	345320	592990	497230	76813		64497.7	40247.1	69113.1	8952.56	57952.6
1397	551160	340220	592090	494490	78033		64237.8	39652.7	69008.2	9094.76	57632.9
1398	548920	335160	591170	491750	79239		63976.7	39062.9	68900.9	9235.31	57313.5
1399	546680	330090	590240	489000	80445		63715.6	38472	68792.5	9375.87	56993.4
1400	544440	325120	589300	486290	81619		63454.5	37892.8	68683	9512.7	56676.8
1401	542200	320180	588350	483580	82777		63193.5	37317	68572.3	9647.67	56360.9
1402	539970	315290	587390	480880	83920		62933.6	36747.1	68460.4	9780.89	56047
1403	537730	310440	586420	478200	85047		62672.5	36181.8	68347.3	9912.24	55733.9
1404	535440	305640	585440	475510	86152		62405.6	35622.4	68233.1	10041	55420.4
1405	533210	300870	584440	472840	87247		62145.7	35066.4	68116.6	10168.6	55109.6
1406	530980	296150	583440	470190	88327		61885.8	34516.3	68000	10294.5	54800.7
1407	528750	291430	582420	467530	89405		61625.9	33966.2	67881.1	10420.2	54491.1
1408	526520	286790	581390	464900	90451		61366	33425.4	67761.1	10542.1	54184.1
1409	524240	282210	580340	462260	91473		61100.2	32891.6	67638.7	10661.2	53876.8
1410	522020	277660	579290	459650	92486		60841.5	32361.3	67516.3	10779.3	53573
1411	519800	273210	578220	457070	93467		60582.8	31842.7	67391.6	10893.6	53272.3
1412	517580	268750	577130	454490	94445		60324	31322.8	67264.6	11007.6	52970.5
1413	515370	264350	576040	451920	95407		60066.4	30810	67137.5	11119.7	52671.3
1414	513160	259980	574920	449360	96352		59808.9	30300.7	67007	11229.8	52372.2
1415	510960	255660	573800	446810	97280		59552.4	29797.2	66876.5	11338	52075.4
1416	508760	251380	572660	444270	98190		59296	29298.4	66743.6	11444.1	51779.3
1417	506560	247150	571510	441740	99083		59039.6	28805.4	66609.6	11548.1	51484.8
1418	504370	242970	570340	439230	99960		58784.4	28318.2	66473.2	11650.3	51191.9
1419	502180	238830	569160	436720	100820		58529.1	27835.7	66335.7	11750.6	50900.2
1420	500000	234730	567960	434230	101660		58275.1	27357.8	66195.8	11848.5	50609.6
1421	497830	230690	566750	431750	102480		58022.1	26886.9	66054.8	11944.1	50321.3
1422	495660	226680	565520	429290	103290		57769.2	26419.6	65911.4	12038.5	50033.4
1423	493490	222720	564280	426830	104080		57516.3	25958	65766.9	12130.5	49747.1
1424	491240	218810	563020	424360	104840		57254.1	25502.3	65620	12219.1	49458.8
1425	489090	214940	561750	421930	105600		57003.5	25051.3	65472	12307.7	49175.6
1426	486950	211120	560460	419510	106330		56754.1	24606.1	65321.7	12392.8	48893.9
1427	484810	207340	559160	417100	107050		56504.7	24165.5	65170.2	12476.7	48613.4
1428	482680	203610	557840	414710	107760		56256.4	23730.8	65016.3	12559.4	48334.5
1429	480560	199930	556500	412330	108440		56009.3	23301.9	64860.1	12638.7	48057.1
1430	478440	196290	555150	409960	109110		55762.2	22877.6	64702.8	12716.8	47780.9
1431	476320	192690	553790	407600	109760		55515.2	22458	64544.3	12792.5	47505.8
1432	474220	189140	552410	405260	110390		55270.4	22044.3	64383.4	12866	47232.7
1433	472120	185640	551010	402920	111000		55025.6	21636.4	64220.3	12937.1	46960.8
1434	470030	182180	549600	400600	111600		54782.1	21233.1	64055.9	13007	46690.4
1435	467940	178760	548170	398290	112180		54538.5	20834.5	63889.3	13074.6	46420.7
1436	465860	175390	546730	395990	112740		54296	20441.7	63721.4	13139.9	46153.1
1437	463790	172070	545270	393710	113290		54054.8	20054.8	63551.3	13204	45886.9
1438	461720	168790	543740	391420	113800		53813.5	19672.5	63373	13263.4	45619.7
1439	459670	165550	542250	389160	114320		53574.6	19294.9	63199.3	13324	45356.3
1440	457610	162360	540750	386910	114810		53334.5	18923.1	63024.5	13381.1	45094
1441	455570	159210	539230	384670	115290		53096.7	18555.9	62847.3	13437.1	44833.3
1442	453530	156110	537700	382450	115750		52859	18194.6	62669	13490.7	44574.2
1443	451510	153050	536150	380230	116190		52623.5	17838	62488.3	13542	44316.6
1444	449480	150030	534590	378030	116620		52386.9	17486	62306.5	13592.1	44059.8
1445	447470	147050	533010	375840	117030		52152.7	17138.7	62122.4	13639.9	43804.6
1446	445460	144120	531420	373670	117420		51918.4	16797.2	61937.1	13685.3	43550.9
1447	443460	141240	529810	371500	117800		51685.3	16461.5	61749.4	13729.6	43298.8
1448	441460	138390	528190	369350	118160		51452.2	16129.4	61560.6	13771.6	43047.4
1449	439480	135590	526560	367210	118510		51221.4	15803	61370.6	13812.4	42798.4
1450	437500	132830	524910	365080	118840		50990.7	15481.4	61178.3	13850.8	42550.1
1451	435520	130110	523240	362960	119150		50759.9	15164.3	60983.7	13886.9	42302.6
1452	433560	127430	521500	360830	119430		50531.5	14852	60780.9	13919.6	42054.8
1453	431600	124790	519810	358730	119710		50303	14544.3	60583.9	13952.2	41810.4
1454	429640	122200	518100	356650	119970		50074.6	14242.4	60384.6	13982.5	41567.2
1455	427700	119640	516390	354580	120220		49848.5	13944.1	60185.3	14011.7	41326
1456	425760	117130	514660	352520	120460		49622.4	13651.5	59983.7	14039.6	41085.9
1457	423770	114660	512920	350450	120670		49390.4	13363.6	59780.9	14064.1	40845
1458	421850	112220	511160	348410	120880		49166.7	13079.3	59575.8	14088.6	40607.2
1459	419930	109830	509390	346380	121060		48942.9	12800.7	59369.5	14109.6	40371
1460	418010	107470	507570	344350	121230		48719.1	12525.6	59157.3	14129.4	40134
1461	416110	105160	505780	342350	121390		48497.7	12256.4	58948.7	14148	39900.9
1462	414200	102880	503970	340350	121530		48275.1	11990.7	58737.8	14164.3	39667.8
1463	412310	100640	502160	338370	121660		48054.8	11729.6	58526.8	14179.5	39437.1
1464	410420	98437	500330	336400	121780		47834.5	11472.8	58313.5	14193.5	39207
1465	408530	96274	498500	334430	121880		47614.2	11220.7	58100.2	14205.1	38978.4
1466	406650	94147	496650	332480	121970		47395.1	10972.8	57884.6	14215.6	38750.9
1467	404770	92057	494790	330540	122040		47176	10729.3	57667.8	14223.8	38524.4
1468	402900	90004	492920	328610	122100		46958	10490	57449.9	14230.8	38299.3
1469	401030	87987	491040	326680	122140		46740.1	10254.9	57230.8	14235.4	38075.3
1470	399110	86006	489150	324760	122170		46516.3	10024	57010.5	14238.9	37850.3
1471	397260	84061	487240	322850	122190		46300.7	9797.32	56787.9	14241.3	37628.6
1472	395410	82151	485330	320960	122200		46085.1	9574.71	56565.3	14242.4	37408.4
1473	393560	80275	483410	319080	122190		45869.5	9356.06	56341.5	14241.3	37189
1474	391710	78434	481490	317210	122170		45653.8	9141.49	56117.7	14238.9	36971
1475	389870	76627	479550	315350	122140		45439.4	8930.89	55891.6	14235.4	36754
1476	388030	74853	477600	313500	122090		45224.9	8724.13	55664.3	14229.6	36537.8
1477	386200	73113	475650	311650	122030		45011.7	8521.33	55437.1	14222.6	36323.3
1478	384370	71406	473690	309820	121960		44798.4	8322.38	55208.6	14214.5	36109.8
1479	382540	69731	471720	307990	121880		44585.1	8127.16	54979	14205.1	35897.1
1480	380710	68088	469740	306180	121790		44371.8	7935.66	54748.3	14194.6	35685.2
1481	378890	66477	467750	304370	121680		44159.7	7747.9	54516.3	14181.8	35474.6
1482	377060	64898	465760	302570	121570		43946.4	7563.87	54284.4	14169	35264.9
1483	375240	63349	463770	300790	121440		43734.3	7383.33	54052.4	14153.8	35056.7
1484	373420	61832	461760	299010	121300		43522.1	7206.53	53818.2	14137.5	34849
1485	371610	60344	459750	297230	121150		43311.2	7033.1	53583.9	14120	34642.7
1486	369790	58886	457740	295470	120990		43099.1	6863.17	53349.7	14101.4	34437.3
1487	367980	57458	455720	293720	120810		42888.1	6696.74	53114.2	14080.4	34233
1488	366170	56059	453690	291970	120630		42677.2	6533.68	52877.6	14059.4	34029.5
1489	364350	54688	451660	290230	120440		42465	6373.89	52641	14037.3	33826.7
1490	362540	53346	449620	288500	120240		42254.1	6217.48	52403.3	14014	33624.9
1491	360730	52032	447580	286780	120020		42043.1	6064.34	52165.5	13988.3	33424.3
1492	358920	50746	445540	285070	119800		41832.2	5914.45	51927.7	13962.7	33224.8
1493	357110	49486	443490	283360	119570		41621.2	5767.6	51688.8	13935.9	33025.9
1494	355300	48254	441440	281670	119330		41410.3	5624.01	51449.9	13907.9	32828
1495	353490	47048	439390	279980	119070		41199.3	5483.45	51211	13877.6	32631.2
1496	351690	45867	437330	278290	118810		40989.5	5345.8	50970.9	13847.3	32435.4
1497	349880	44713	435270	276620	118550		40778.6	5211.31	50730.8	13817	32240.2
1498	348060	43584	433210	274950	118270		40566.4	5079.72	50490.7	13784.4	32045.6
1499	346250	42480	431150	273290	117980		40355.5	4951.05	50250.6	13750.6	31852.4
1500	344440	41400	429080	271640	117680		40144.5	4825.17	50009.3	13715.6	31659.7
1501	342630	40345	427010	270000	117380		39933.6	4702.21	49768.1	13680.7	31467.9
1502	340810	39313	424950	268360	117070		39721.4	4581.93	49528	13644.5	31277.1
1503	339000	38305	422880	266730	116750		39510.5	4464.45	49286.7	13607.2	31087.2
1504	337180	37320	420810	265100	116420		39298.4	4349.65	49045.5	13568.8	30897.8
1505	335360	36357	418730	263490	116090		39086.2	4237.41	48803	13530.3	30708.9
1506	333540	35417	416660	261880	115740		38874.1	4127.86	48561.8	13489.5	30521.3
1507	331720	34499	414590	260270	115390		38662	4020.86	48320.5	13448.7	30334.5
1508	329900	33603	412520	258670	115040		38449.9	3916.43	48079.3	13407.9	30148.5
1509	328070	32728	410450	257080	114670		38236.6	3814.45	47838	13364.8	29963
1510	326250	31873	408380	255500	114300		38024.5	3714.8	47596.7	13321.7	29778.7
1511	324420	31040	406310	253920	113920		37811.2	3617.72	47355.5	13277.4	29594.8
1512	322590	30227	404240	252350	113540		37597.9	3522.96	47114.2	13233.1	29411.7
1513	320750	29433	402170	250790	113140		37383.4	3430.42	46873	13186.5	29228.9
1514	318920	28659	400110	249230	112750		37170.2	3340.21	46632.9	13141	29047.7
1515	317080	27905	398040	247670	112340		36955.7	3252.33	46391.6	13093.2	28866.6
1516	315240	27169	395980	246130	111930		36741.3	3166.55	46151.5	13045.5	28686.4
1517	313350	26452	393920	244570	111510		36521	3082.98	45911.4	12996.5	28505.1
1518	311500	25753	391860	243040	111090		36305.4	3001.52	45671.3	12947.6	28326.1
1519	309650	25073	389800	241510	110660		36089.7	2922.26	45431.2	12897.4	28147.7
1520	307800	24410	387750	239990	110230		35874.1	2844.99	45192.3	12847.3	27970.5
1521	305950	23687	385700	238450	109820		35658.5	2760.72	44953.4	12799.5	27790.9
1522	304090	23003	383650	236920	109390		35441.7	2681	44714.5	12749.4	27612.4
1523	302230	22398	381610	235410	108940		35224.9	2610.49	44476.7	12697	27437.4
1524	300370	21808	379570	233920	108490		35008.2	2541.72	44238.9	12644.5	27262.9
1525	298510	21234	377530	232420	108030		34791.4	2474.83	44001.2	12590.9	27089.1
1526	296640	20676	375490	230940	107570		34573.4	2409.79	43763.4	12537.3	26915.5
1527	294770	20133	373460	229450	107100		34355.5	2346.5	43526.8	12482.5	26742.9
1528	292890	19605	371430	227980	106620		34136.4	2284.97	43290.2	12426.6	26570.5
1529	291010	19091	369410	226510	106150		33917.2	2225.06	43054.8	12371.8	26399
1530	289130	18592	367390	225040	105670		33698.1	2166.9	42819.3	12315.9	26228.1
1531	287250	18108	365380	223580	105180		33479	2110.49	42585.1	12258.7	26058.2
1532	285360	17637	363360	222120	104690		33258.7	2055.59	42349.7	12201.6	25888
1533	283470	17179	361360	220670	104200		33038.5	2002.21	42116.6	12144.5	25719.1
1534	281580	16735	359360	219220	103700		32818.2	1950.47	41883.4	12086.2	25550.7
1535	279680	16305	357360	217780	103200		32596.7	1900.35	41650.3	12028	25382.5
1536	277780	15887	355370	216350	102700		32375.3	1851.63	41418.4	11969.7	25215.1
1537	275880	15482	353380	214910	102190		32153.8	1804.43	41186.5	11910.3	25048.3
1538	273980	15089	351400	213490	101690		31932.4	1758.62	40955.7	11852	24882.2
1539	272070	14708	349420	212070	101170		31709.8	1714.22	40724.9	11791.4	24716.3
1540	270160	14339	347440	210650	100660		31487.2	1671.21	40494.2	11731.9	24550.9
1541	268250	13982	345480	209240	100140		31264.6	1629.6	40265.7	11671.3	24386.6
1542	266330	13636	343510	207830	99619		31040.8	1589.28	40036.1	11610.6	24222.1
1543	264410	13302	341560	206420	99096		30817	1550.35	39808.9	11549.7	24058.7
1544	262490	12978	339610	205030	98570		30593.2	1512.59	39581.6	11488.3	23895.8
1545	260570	12666	337660	203630	98042		30369.5	1476.22	39354.3	11426.8	23733.3
1546	258650	12364	335720	202240	97512		30145.7	1441.03	39128.2	11365	23571.6
1547	256720	12072	333780	200860	96979		29920.7	1406.99	38902.1	11302.9	23409.9
1548	254790	11791	331850	199480	96445		29695.8	1374.24	38677.2	11240.7	23249.1
1549	252860	11519	329930	198100	95908		29470.9	1342.54	38453.4	11178.1	23088.9
1550	250930	11257	328010	196730	95369		29245.9	1312	38229.6	11115.3	22929.2
1551	249000	11005	326100	195370	94829		29021	1282.63	38007	11052.3	22770.2
1552	247060	10762	324190	194000	94287		28794.9	1254.31	37784.4	10989.2	22611.2
1553	245120	10529	322290	192650	93744		28568.8	1227.16	37562.9	10925.9	22453
1554	243190	10304	320390	191290	93199		28343.8	1200.93	37341.5	10862.4	22295.4
1555	241250	10089	318500	189950	92652		28117.7	1175.87	37121.2	10798.6	22138.3
1556	239310	9881.6	316620	188600	92105		27891.6	1151.7	36902.1	10734.8	21981.8
1557	237370	9683.1	314740	187260	91556		27665.5	1128.57	36683	10670.9	21825.7
1558	235430	9492.9	312860	185930	91006		27439.4	1106.4	36463.9	10606.8	21669.9
1559	233480	9260.8	311000	184580	90471		27212.1	1079.35	36247.1	10544.4	21512.9
1560	231540	9089.1	309140	183260	89918		26986	1059.34	36030.3	10480	21358.6
1561	229600	8925.2	307280	181930	89364		26759.9	1040.23	35813.5	10415.4	21204.6
1562	227660	8768.9	305430	180620	88809		26533.8	1022.02	35597.9	10350.7	21051.2
1563	225710	8620	303590	179310	88254		26306.5	1004.66	35383.4	10286	20898.2
1564	223770	8478.3	301750	178000	87698		26080.4	988.147	35169	10221.2	20745.9
1565	221830	8343.9	299810	176660	87118		25854.3	972.483	34942.9	10153.6	20589.9
1566	219890	8216.4	297990	175370	86562		25628.2	957.622	34730.8	10088.8	20438.9
1567	217950	8095.9	296170	174070	86006		25402.1	943.578	34518.6	10024	20288.1
1568	216010	7982.1	294360	172780	85449		25176	930.315	34307.7	9959.09	20138
1569	214070	7874.9	292560	171500	84892		24949.9	917.821	34097.9	9894.17	19988.5
1570	212130	7774.2	290760	170220	84335		24723.8	906.084	33888.1	9829.25	19839.3
1571	210200	7679.9	288960	168950	83778		24498.8	895.093	33678.3	9764.34	19690.7
1572	208260	7591.9	287170	167680	83220		24272.7	884.837	33469.7	9699.3	19542.4
1573	206330	7510	285390	166410	82663		24047.8	875.291	33262.2	9634.38	19395.1
1574	204400	7434.2	283610	165150	82105		23822.8	866.457	33054.8	9569.35	19248
1575	202470	7364.3	281840	163890	81548		23597.9	858.31	32848.5	9504.43	19101.6
1576	200550	7300.2	280070	162640	80991		23374.1	850.839	32642.2	9439.51	18955.7
1577	198630	7241.8	278310	161390	80434		23150.3	844.033	32437.1	9374.59	18810.5
1578	196710	7189	276550	160150	79877		22926.6	837.879	32231.9	9309.67	18665.5
1579	194790	7141.8	274790	158910	79320		22702.8	832.378	32026.8	9244.76	18520.7
1580	192880	7099.9	273050	157670	78764		22480.2	827.494	31824	9179.95	18377.2
1581	190970	7063.4	271310	156450	78209		22257.6	823.24	31621.2	9115.27	18234
1582	189060	7032.2	269570	155220	77653		22035	819.604	31418.4	9050.47	18091
1583	187160	7006.1	267840	154000	77099		21813.5	816.562	31216.8	8985.9	17949
1584	185260	6985.1	266110	152780	76545		21592.1	814.114	31015.2	8921.33	17807.1
1585	183370	6969	264390	151570	75991		21371.8	812.238	30814.7	8856.76	17666.2
1586	181480	6957.9	262670	150370	75438		21151.5	810.944	30614.2	8792.31	17525.6
1587	179590	6951.6	260960	149170	74886		20931.2	810.21	30414.9	8727.97	17385.5
1588	177710	6950	259250	147970	74335		20712.1	810.023	30215.6	8663.75	17245.9
1589	175840	6890.6	257550	146760	73804		20494.2	803.1	30017.5	8601.86	17104.9
1590	173970	6901.3	255850	145570	73254		20276.2	804.347	29819.3	8537.76	16966.6
1591	172100	6916.4	254150	144390	72704		20058.3	806.107	29621.2	8473.66	16828.5
1592	170240	6935.9	252470	143220	72155		19841.5	808.38	29425.4	8409.67	16691.8
1593	168390	6959.7	250780	142040	71608		19625.9	811.154	29228.4	8345.92	16555.2
1594	166540	6987.7	249100	140880	71061		19410.3	814.417	29032.6	8282.17	16419.1
1595	164700	7019.9	247430	139720	70515		19195.8	818.17	28838	8218.53	16284
1596	162870	7056.3	245760	138560	69971		18982.5	822.413	28643.4	8155.13	16149.4
1597	161040	7096.7	244090	137410	69427		18769.2	827.121	28448.7	8091.72	16015
1598	159220	7141.3	242430	136260	68885		18557.1	832.319	28255.2	8028.55	15881.6
1599	157410	7189.8	240770	135120	68344		18346.2	837.972	28061.8	7965.5	15748.6
1600	155600	7242.2	239070	133970	67791		18135.2	844.079	27863.6	7901.05	15614.3
1601	153800	7298.6	237420	132840	67253		17925.4	850.653	27671.3	7838.34	15482.5
1602	152010	7358.9	235780	131720	66716		17716.8	857.681	27480.2	7775.76	15351.6
1603	150230	7423	234140	130600	66180		17509.3	865.152	27289	7713.29	15221.2
1604	148450	7490.9	232510	129480	65646		17301.9	873.065	27099.1	7651.05	15091.3
1605	146680	7562.6	230880	128380	65113		17095.6	881.422	26909.1	7588.93	14962
1606	144920	7638	229250	127270	64581		16890.4	890.21	26719.1	7526.92	14833.3
1607	143170	7717.1	227630	126170	64051		16686.5	899.429	26530.3	7465.15	14705.4
1608	141430	7799.8	226020	125080	63522		16483.7	909.068	26342.7	7403.5	14578.5
1609	139690	7886.2	224400	123990	62994		16280.9	919.138	26153.8	7341.96	14451.3
1610	137970	7976.3	222790	122910	62467		16080.4	929.639	25966.2	7280.54	14325.4
1611	136250	8069.9	221190	121840	61942		15880	940.548	25779.7	7219.35	14200.1
1612	134550	8167.1	219580	120770	61419		15681.8	951.876	25592.1	7158.39	14075.3
1613	132850	8267.8	217990	119700	60897		15483.7	963.613	25406.8	7097.55	13951.4
1614	131160	8372	216390	118640	60376		15286.7	975.758	25220.3	7036.83	13827.6
1615	129490	8479.8	214800	117590	59857		15092.1	988.322	25035	6976.34	13705.1
1616	127820	8591	213220	116540	59339		14897.4	1001.28	24850.8	6915.97	13583.2
1617	126160	8705.7	211630	115500	58822		14704	1014.65	24665.5	6855.71	13461.4
1618	124510	8823.8	210050	114460	58307		14511.7	1028.41	24481.4	6795.69	13340.5
1619	122870	8945.3	208480	113430	57794		14320.5	1042.58	24298.4	6735.9	13220.5
1620	121250	9070.3	206910	112410	57282		14131.7	1057.14	24115.4	6676.22	13101.4
1621	119630	9198.7	205340	111390	56771		13942.9	1072.11	23932.4	6616.67	12982.5
1622	118030	9330.5	203780	110380	56262		13756.4	1087.47	23750.6	6557.34	12864.8
1623	116430	9465.6	202220	109370	55754		13569.9	1103.22	23568.8	6498.14	12747.3
1624	114850	9604.2	200660	108370	55248		13385.8	1119.37	23386.9	6439.16	12630.7
1625	113280	9746.1	199110	107380	54743		13202.8	1135.91	23206.3	6380.3	12515
1626	111710	9891.3	197560	106390	54240		13019.8	1152.83	23025.6	6321.68	12399.4
1627	110160	10040	196010	105410	53739		12839.2	1170.16	22845	6263.29	12284.8
1628	108620	10192	194470	104430	53238		12659.7	1187.88	22665.5	6204.9	12171
1629	107100	10347	192930	103460	52740		12482.5	1205.94	22486	6146.85	12058.2
1630	105580	10506	191400	102500	52243		12305.4	1224.48	22307.7	6088.93	11945.8
1631	104080	10668	189870	101540	51747		12130.5	1243.36	22129.4	6031.12	11834.4
1632	102590	10833	188340	100590	51253		11956.9	1262.59	21951	5973.54	11723.5
1633	101110	11002	186820	99643	50760		11784.4	1282.28	21773.9	5916.08	11613.5
1634	99638	11173	185300	98705	50269		11612.8	1302.21	21596.7	5858.86	11503.9
1635	98183	11349	183790	97773	49779		11443.2	1322.73	21420.7	5801.75	11395.6
1636	96739	11527	182280	96848	49291		11274.9	1343.47	21244.8	5744.87	11287.7
1637	95307	11709	180770	95929	48804		11108	1364.69	21068.8	5688.11	11180.5
1638	93888	11895	179270	95016	48319		10942.7	1386.36	20893.9	5631.59	11074.3
1639	92481	12083	177770	94110	47836		10778.7	1408.28	20719.1	5575.29	10968.7
1640	91087	12275	176270	93211	47354		10616.2	1430.65	20544.3	5519.11	10863.7
1641	89705	12470	174780	92318	46873		10455.1	1453.38	20370.6	5463.05	10759.7
1642	88336	12669	173290	91432	46394		10295.6	1476.57	20197	5407.23	10656.4
1643	86979	12871	171810	90553	45916		10137.4	1500.12	20024.5	5351.52	10554
1644	85636	13076	170330	89680	45440		9980.89	1524.01	19852	5296.04	10452.3
1645	84304	13285	168850	88814	44965		9825.64	1548.37	19679.5	5240.68	10351.2
1646	82986	13497	167380	87955	44492		9672.03	1573.08	19508.2	5185.55	10251.1
1647	81680	13712	165920	87103	44021		9519.81	1598.14	19338	5130.65	10152
1648	80388	13931	164450	86257	43551		9369.23	1623.66	19166.7	5075.87	10053.2
1649	79108	14153	162990	85418	43082		9220.05	1649.53	18996.5	5021.21	9955.36
1650	77841	14379	161540	84586	42615		9072.38	1675.87	18827.5	4966.78	9858.59
1651	76503	14559	160090	83717	42165		8916.43	1696.85	18658.5	4914.34	9757.26
1652	75265	14794	158640	82901	41701		8772.14	1724.24	18489.5	4860.26	9661.97
1653	74041	15032	157200	82091	41238		8629.49	1751.98	18321.7	4806.29	9567.72
1654	72830	15273	155760	81289	40776		8488.34	1780.07	18153.8	4752.45	9474.09
1655	71631	15518	154330	80494	40317		8348.6	1808.62	17987.2	4698.95	9381.47
1656	70445	15766	152900	79705	39858		8210.37	1837.53	17820.5	4645.45	9289.47
1657	69272	15919	151480	78891	39428		8073.66	1855.36	17655	4595.34	9194.68
1658	68112	16178	150060	78118	38971		7938.46	1885.55	17489.5	4542.07	9104.51
1659	66918	16440	148650	77336	38519		7799.3	1916.08	17325.2	4489.39	9013.52
1660	65786	16706	147240	76577	38066		7667.37	1947.09	17160.8	4436.6	8925.1
1661	64667	16975	145830	75825	37615		7536.95	1978.44	16996.5	4384.03	8837.3
1662	63560	17247	144440	75081	37165		7407.93	2010.14	16834.5	4331.59	8750.85
1663	62466	17522	143040	74343	36717		7280.42	2042.19	16671.3	4279.37	8664.65
1664	61386	17801	141650	73612	36271		7154.55	2074.71	16509.3	4227.39	8579.53
1665	60317	18083	140270	72889	35827		7029.95	2107.58	16348.5	4175.64	8495.34
1666	59262	18369	138890	72172	35384		6906.99	2140.91	16187.6	4124.01	8411.85
1667	58219	18657	137510	71463	34944		6785.43	2174.48	16026.8	4072.73	8328.9
1668	57189	18949	136140	70761	34505		6665.38	2208.51	15867.1	4021.56	8247.01
1669	56172	19245	134780	70065	34068		6546.85	2243.01	15708.6	3970.63	8166.16
1670	55168	19544	133420	69377	33632		6429.84	2277.86	15550.1	3919.81	8085.94
1671	54176	19846	132070	68696	33199		6314.22	2313.05	15392.8	3869.35	8006.68
1672	53196	20152	130720	68023	32768		6200	2348.72	15235.4	3819.11	7928.05
1673	52229	20462	129380	67356	32338		6087.3	2384.85	15079.3	3769	7850.47
1674	51275	20774	128040	66697	31911		5976.11	2421.21	14923.1	3719.23	7773.47
1675	50333	21091	126710	66045	31485		5866.32	2458.16	14768.1	3669.58	7697.51
1676	49404	21411	125380	65400	31062		5758.04	2495.45	14613.1	3620.28	7622.18
1677	48486	21734	124070	64762	30641		5651.05	2533.1	14460.4	3571.21	7548.17
1678	47582	22061	122750	64131	30222		5545.69	2571.21	14306.5	3522.38	7474.48
1679	46689	22391	121440	63508	29805		5441.61	2609.67	14153.8	3473.78	7401.71
1680	45809	22725	120140	62892	29390		5339.04	2648.6	14002.3	3425.41	7329.99
1681	44941	23063	118850	62283	28978		5237.88	2688	13852	3377.39	7259.29
1682	44085	23404	117560	61682	28568		5138.11	2727.74	13701.6	3329.6	7189.16
1683	43241	23749	116270	61088	28161		5039.74	2767.95	13551.3	3282.17	7119.66
1684	42408	24097	115000	60501	27756		4942.66	2808.51	13403.3	3234.97	7051.48
1685	41588	24450	113730	59921	27353		4847.09	2849.65	13255.2	3188	6983.99
1686	40780	24805	112460	59349	26954		4752.91	2891.03	13107.2	3141.49	6917.06
1687	39983	25165	111200	58784	26556		4660.02	2932.98	12960.4	3095.1	6851.13
1688	39198	25528	109950	58226	26162		4568.53	2975.29	12814.7	3049.18	6786.17
1689	38425	25894	108710	57675	25771		4478.44	3017.95	12670.2	3003.61	6722.18
1690	37663	26265	107470	57132	25382		4389.63	3061.19	12525.6	2958.28	6658.82
1691	36912	26638	106240	56596	24997		4302.1	3104.66	12382.3	2913.4	6596.35
1692	36173	27016	105010	56067	24614		4215.97	3148.72	12238.9	2868.76	6534.54
1693	35446	27398	103790	55545	24235		4131.24	3193.24	12096.7	2824.59	6473.74
1694	34729	27783	102580	55031	23860		4047.67	3238.11	11955.7	2780.89	6413.83
1695	34023	28171	101380	54524	23487		3965.38	3283.33	11815.9	2737.41	6354.86
1696	33329	28564	100180	54024	23119		3884.5	3329.14	11676	2694.52	6296.54
1697	32645	28960	98989	53531	22754		3804.78	3375.29	11537.2	2651.98	6239.08
1698	31973	29360	97805	53046	22392		3726.46	3421.91	11399.2	2609.79	6182.52
1699	31311	29763	96629	52568	22035		3649.3	3468.88	11262.1	2568.18	6126.77
1700	30659	30171	95460	52097	21682		3573.31	3516.43	11125.9	2527.04	6071.87
1701	30018	30582	94298	51633	21333		3498.6	3564.34	10990.4	2486.36	6017.79
1702	29388	30996	93144	51176	20989		3425.17	3612.59	10855.9	2446.27	5964.57
1703	28768	31415	91997	50726	20649		3352.91	3661.42	10722.3	2406.64	5912.2
1704	28158	31837	90857	50284	20314		3281.82	3710.61	10589.4	2367.6	5860.61
1705	27559	32263	89725	49849	19984		3212	3760.26	10457.5	2329.14	5809.91
1706	26969	32692	88600	49421	19659		3143.24	3810.26	10326.3	2291.26	5759.95
1707	26390	33126	87483	48999	19340		3075.76	3860.84	10196.2	2254.08	5710.92
1708	25820	33563	86373	48585	19026		3009.32	3911.77	10066.8	2217.48	5662.63
1709	25260	34003	85271	48178	18717		2944.06	3963.05	9938.34	2181.47	5615.15
1710	24710	34448	84177	47778	18415		2879.95	4014.92	9810.84	2146.27	5568.57
1711	24170	34896	83091	47385	18119		2817.02	4067.13	9684.27	2111.77	5522.8
1712	23587	35348	82012	46982	17841		2749.07	4119.81	9558.51	2079.37	5475.8
1713	23067	35803	80941	46604	17558		2688.46	4172.84	9433.68	2046.39	5431.66
1714	22557	36262	79878	46232	17282		2629.02	4226.34	9309.79	2014.22	5388.38
1715	22056	36725	78823	45868	17013		2570.63	4280.3	9186.83	1982.87	5345.92
1716	21563	37191	77776	45510	16752		2513.17	4334.62	9064.8	1952.45	5304.2
1717	21080	37661	76737	45159	16499		2456.88	4389.39	8943.71	1922.96	5263.33
1718	20605	38135	75706	44815	16253		2401.52	4444.64	8823.54	1894.29	5223.23
1719	20139	38612	74683	44478	16017		2347.2	4500.23	8704.31	1866.78	5183.92
1720	19681	39093	73669	44148	15788		2293.82	4556.29	8586.13	1840.09	5145.42
1721	19232	39577	72662	43824	15569		2241.49	4612.7	8468.76	1814.57	5107.65
1722	18792	40065	71663	43507	15359		2190.21	4669.58	8352.33	1790.09	5070.71
1723	18359	40557	70673	43196	15159		2139.74	4726.92	8236.95	1766.78	5034.54
1724	17935	41052	69691	42892	14969		2090.33	4784.62	8122.49	1744.64	4999.15
1725	17519	41550	68717	42595	14789		2041.84	4842.66	8008.97	1723.66	4964.49
1726	17110	42052	67751	42305	14619		1994.17	4901.17	7896.39	1703.85	4930.57
1727	16710	42558	66794	42020	14460		1947.55	4960.14	7784.85	1685.31	4897.51
1728	16317	43067	65845	41743	14313		1901.75	5019.46	7674.24	1668.18	4865.15
1729	15932	43579	64904	41472	14176		1856.88	5079.14	7564.57	1652.21	4833.53
1730	15554	44095	63971	41207	14051		1812.82	5139.28	7455.83	1637.65	4802.64
1731	15184	44614	63047	40949	13938		1769.7	5199.77	7348.14	1624.48	4772.53
1732	14821	45137	62132	40697	13837		1727.39	5260.72	7241.49	1612.7	4743.2
1733	14465	45663	61224	40451	13747		1685.9	5322.03	7135.66	1602.21	4714.53
1734	14117	46192	60325	40211	13670		1645.34	5383.68	7030.89	1593.24	4686.64
1735	13775	46725	59435	39978	13606		1605.48	5445.8	6927.16	1585.78	4659.48
1736	13441	47260	58553	39751	13553		1566.55	5508.16	6824.36	1579.6	4633.02
1737	13113	47799	57679	39530	13513		1528.32	5570.98	6722.49	1574.94	4607.26
1738	12792	48342	56814	39316	13486		1490.91	5634.27	6621.68	1571.79	4582.28
1739	12477	48887	55957	39107	13471		1454.2	5697.79	6521.79	1570.05	4557.93
1740	12169	49436	55109	38904	13468		1418.3	5761.77	6422.96	1569.7	4534.34
1741	11867	49987	54269	38708	13477		1383.1	5825.99	6325.06	1570.75	4511.38
1742	11572	50542	53437	38517	13498		1348.72	5890.68	6228.09	1573.19	4489.16
1743	11283	51100	52614	38332	13532		1315.03	5955.71	6132.17	1577.16	4467.64
1744	11000	51661	51799	38153	13577		1282.05	6021.1	6037.18	1582.4	4446.78
1745	10723	52225	50993	37980	13633		1249.77	6086.83	5943.24	1588.93	4426.61
1746	10452	52792	50195	37813	13701		1218.18	6152.91	5850.23	1596.85	4407.11
1747	10187	53361	49406	37651	13780		1187.3	6219.23	5758.28	1606.06	4388.27
1748	9927	53934	48625	37495	13869		1156.99	6286.01	5667.25	1616.43	4370.09
1749	9673.1	54509	47852	37345	13969		1127.4	6353.03	5577.16	1628.09	4352.53
1750	9424.7	55087	47088	37200	14078		1098.45	6420.4	5488.11	1640.79	4335.65
1751	9181.8	55668	46332	37061	14198		1070.14	6488.11	5400	1654.78	4319.42
1752	8944.3	56252	45584	36927	14326		1042.46	6556.18	5312.82	1669.7	4303.82
1753	8712	56838	44845	36798	14464		1015.38	6624.48	5226.69	1685.78	4288.85
1754	8484.9	57427	44030	36647	14603		988.916	6693.12	5131.7	1701.98	4271.25
1755	8262.9	58019	43311	36531	14758		963.042	6762.12	5047.9	1720.05	4257.69
1756	8045.9	58613	42600	36419	14921		937.751	6831.35	4965.03	1739.04	4244.71
1757	7833.8	59209	41897	36313	15091		913.03	6900.82	4883.1	1758.86	4232.32
1758	7626.5	59808	41202	36212	15269		888.869	6970.63	4802.1	1779.6	4220.53
1759	7423.9	60409	40516	36116	15453		865.256	7040.68	4722.14	1801.05	4209.36
1760	7226	61013	39837	36025	15643		842.191	7111.07	4643.01	1823.19	4198.76
1761	7032.7	61619	39166	35939	15840		819.662	7181.7	4564.8	1846.15	4188.72
1762	6843.8	62227	38504	35858	16042		797.646	7252.56	4487.65	1869.7	4179.29
1763	6659.4	62837	37849	35782	16250		776.154	7323.66	4411.31	1893.94	4170.37
1764	6479.2	63450	37202	35710	16463		755.152	7395.1	4335.9	1918.76	4162.05
1765	6303.3	64064	36563	35644	16681		734.65	7466.67	4261.42	1944.17	4154.25
1766	6131.6	64681	35932	35582	16903		714.639	7538.58	4187.88	1970.05	4147.03
1767	5963.9	65299	35309	35524	17129		695.093	7610.61	4115.27	1996.39	4140.32
1768	5800.2	65920	34694	35471	17359		676.014	7682.98	4043.59	2023.19	4134.2
1769	5640.5	66542	34086	35423	17593		657.401	7755.48	3972.73	2050.47	4128.54
1770	5484.6	67166	33487	35379	17831		639.231	7828.21	3902.91	2078.21	4123.45
1771	5332.5	67792	32895	35340	18072		621.503	7901.17	3833.92	2106.29	4118.86
1772	5184	68419	32310	35305	18316		604.196	7974.24	3765.73	2134.73	4114.72
1773	5039.2	69049	31734	35274	18562		587.319	8047.67	3698.6	2163.4	4111.2
1774	4897.9	69679	31165	35247	18812		570.851	8121.1	3632.28	2192.54	4108.08
1775	4760.2	70311	30603	35225	19064		554.802	8194.76	3566.78	2221.91	4105.45
1776	4625.8	70945	30049	35206	19318		539.138	8268.65	3502.21	2251.52	4103.33
1777	4494.7	71580	29502	35192	19574		523.858	8342.66	3438.46	2281.35	4101.66
1778	4367	72216	28963	35182	19832		508.974	8416.78	3375.64	2311.42	4100.47
1779	4242.4	72853	28431	35176	20091		494.452	8491.03	3313.64	2341.61	4099.7
1780	4121	73492	27907	35173	20353		480.303	8565.5	3252.56	2372.14	4099.46
1781	4002.6	74131	27390	35175	20615		466.503	8639.98	3192.31	2402.68	4099.6
1782	3887.3	74772	26880	35180	20879		453.065	8714.69	3132.87	2433.45	4100.21
1783	3774.9	75414	26377	35189	21144		439.965	8789.51	3074.24	2464.34	4101.24
1784	3665.4	76056	25882	35201	21411		427.203	8864.34	3016.55	2495.45	4102.7
1785	3558.7	76699	25393	35217	21678		414.767	8939.28	2959.56	2526.57	4104.53
1786	3454.7	77343	24912	35237	21946		402.646	9014.34	2903.5	2557.81	4106.83
1787	3353.5	77988	24438	35260	22214		390.851	9089.51	2848.25	2589.04	4109.54
1788	3254.8	78633	23970	35286	22483		379.347	9164.69	2793.71	2620.4	4112.58
1789	3158.8	79279	23510	35316	22753		368.159	9239.98	2740.09	2651.86	4116.08
1790	3065.3	79925	23056	35349	23023		357.261	9315.27	2687.18	2683.33	4119.9
1791	2974.3	80572	22609	35385	23294		346.655	9390.68	2635.08	2714.92	4124.14
1792	2885.6	81219	22169	35424	23564		336.317	9466.08	2583.8	2746.39	4128.73
1793	2799.4	81866	21735	35467	23835		326.27	9541.49	2533.22	2777.97	4133.66
1794	2715.4	82513	21308	35512	24106		316.48	9616.9	2483.45	2809.56	4138.94
1795	2633.7	83161	20888	35561	24376		306.958	9692.42	2434.5	2841.03	4144.63
1796	2554.2	83808	20474	35612	24647		297.692	9767.83	2386.25	2872.61	4150.59
1797	2476.8	84455	20066	35666	24917		288.671	9843.24	2338.69	2904.08	4156.87
1798	2401.5	85102	19665	35723	25188		279.895	9918.65	2291.96	2935.66	4163.5
1799	2328.3	85749	19270	35783	25457		271.364	9994.06	2245.92	2967.02	4170.45
1800	2257.1	86395	18882	35845	25727		263.065	10069.3	2200.7	2998.48	4177.7
1801	2187.9	87041	18500	35910	25996		255	10144.6	2156.18	3029.84	4185.27
1802	2120.5	87687	18124	35977	26264		247.145	10219.9	2112.35	3061.07	4193.14
1803	2055.1	88332	17753	36047	26532		239.522	10295.1	2069.11	3092.31	4201.25
1804	1991.4	88976	17389	36119	26800		232.098	10370.2	2026.69	3123.54	4209.65
1805	1929.5	89620	17031	36194	27066		224.883	10445.2	1984.97	3154.55	4218.36
1806	1869.4	90262	16679	36270	27332		217.879	10520	1943.94	3185.55	4227.29
1807	1810.9	90904	16333	36349	27598		211.061	10594.9	1903.61	3216.55	4236.52
1808	1754.1	91545	15992	36430	27862		204.441	10669.6	1863.87	3247.32	4245.96
1809	1699	92185	15657	36514	28126		198.019	10744.2	1824.83	3278.09	4255.67
1810	1645.3	92823	15328	36599	28388		191.76	10818.5	1786.48	3308.62	4265.59
1811	1593.2	93460	15005	36686	28650		185.688	10892.8	1748.83	3339.16	4275.77
1812	1542.6	94096	14687	36775	28911		179.79	10966.9	1711.77	3369.58	4286.15
1813	1493.5	94731	14302	36842	29179		174.068	11040.9	1666.9	3400.82	4293.96
1814	1445.8	95363	13998	36936	29438		168.508	11114.6	1631.47	3431	4304.85
1815	1399.5	95995	13699	37031	29695		163.112	11188.2	1596.62	3460.96	4315.99
1816	1354.5	96624	13405	37128	29951		157.867	11261.5	1562.35	3490.79	4327.25
1817	1310.8	97252	13116	37226	30206		152.774	11334.7	1528.67	3520.51	4338.73
1818	1268.4	97878	12833	37326	30459		147.832	11407.7	1495.69	3550	4350.4
1819	1227.2	98502	12554	37428	30712		143.03	11480.4	1463.17	3579.49	4362.21
1820	1187.3	99124	12280	37531	30963		138.38	11552.9	1431.24	3608.74	4374.18
1821	1148.6	99744	12011	37635	31213		133.869	11625.2	1399.88	3637.88	4386.31
1822	1111	100360	11747	37740	31461		129.487	11697	1369.11	3666.78	4398.52
1823	1074.5	100980	11488	37846	31708		125.233	11769.2	1338.93	3695.57	4411.13
1824	1039.1	101590	11234	37954	31954		121.107	11840.3	1309.32	3724.24	4423.59
1825	1004.8	102200	10984	38063	32198		117.11	11911.4	1280.19	3752.68	4436.24
1826	971.51	102810	10738	38173	32440		113.23	11982.5	1251.52	3780.89	4449.09
1827	939.23	103410	10498	38283	32681		109.467	12052.4	1223.54	3808.97	4461.82
1828	907.94	104020	10261	38395	32921		105.821	12123.5	1195.92	3836.95	4475.09
1829	877.59	104610	10029	38507	33159		102.283	12192.3	1168.88	3864.69	4487.82
1830	848.18	105210	9801.9	38620	33396		98.8555	12262.2	1142.41	3892.31	4501.17
1831	819.67	105800	9578.6	38734	33630		95.5326	12331	1116.39	3919.58	4514.31
1832	792.04	106400	9359.6	38849	33864		92.3124	12400.9	1090.86	3946.85	4528.04
1833	765.26	106980	9144.8	38964	34095		89.1911	12468.5	1065.83	3973.78	4541.18
1834	739.32	107570	8934.1	39080	34325		86.1678	12537.3	1041.27	4000.58	4554.91
1835	714.18	108150	8727.4	39196	34553		83.2378	12604.9	1017.18	4027.16	4568.44
1836	689.82	108720	8524.8	39313	34779		80.3986	12671.3	993.566	4053.5	4581.76
1837	666.23	109300	8326.1	39430	35004		77.6492	12738.9	970.408	4079.72	4595.66
1838	643.38	109870	8131.3	39547	35226		74.986	12805.4	947.704	4105.59	4609.35
1839	621.25	110430	7940.3	39665	35447		72.4068	12870.6	925.443	4131.35	4622.83
1840	599.83	110990	7753.2	39783	35666		69.9103	12935.9	903.636	4156.88	4636.48
1841	579.08	111550	7569.7	39901	35883		67.4918	13001.2	882.249	4182.17	4650.3
1842	558.99	112110	7389.9	40019	36098		65.1503	13066.4	861.294	4207.23	4664.29
1843	539.55	112660	7213.8	40137	36311		62.8846	13130.5	840.769	4232.05	4678.06
1844	520.73	113200	7041.2	40255	36523		60.6911	13193.5	820.653	4256.76	4691.61
1845	502.52	113750	6872.1	40373	36732		58.5688	13257.6	800.944	4281.12	4705.7
1846	484.89	114280	6706.5	40491	36939		56.514	13319.3	781.643	4305.24	4719.17
1847	467.83	114820	6544.2	40609	37145		54.5256	13382.3	762.727	4329.25	4733.18
1848	451.33	115340	6385.3	40727	37348		52.6026	13442.9	744.207	4352.91	4746.57
1849	435.37	115870	6229.8	40844	37549		50.7424	13504.7	726.084	4376.34	4760.5
1850	419.93	116390	6077.4	40961	37748		48.9429	13565.3	708.322	4399.53	4774.18
1851	405	116900	5928.2	41078	37945		47.2028	13624.7	690.932	4422.49	4787.61
1852	390.55	117410	5782.2	41194	38140		45.5186	13684.1	673.916	4445.22	4801.19
1853	376.59	117910	5639.3	41310	38332		43.8916	13742.4	657.261	4467.6	4814.53
1854	363.09	118410	5499.4	41426	38523		42.3182	13800.7	640.956	4489.86	4827.99
1855	350.03	118910	5362.4	41540	38711		40.796	13859	624.988	4511.77	4841.59
1856	337.41	119400	5228.5	41655	38897		39.3252	13916.1	609.382	4533.45	4854.93
1857	325.22	119880	5097.4	41768	39081		37.9044	13972	594.103	4554.9	4868.01
1858	313.43	120360	4969.1	41881	39263		36.5303	14028	579.149	4576.11	4881.22
1859	302.04	120830	4843.6	41993	39442		35.2028	14082.8	564.522	4596.97	4894.16
1860	291.03	121300	4720.9	42104	39619		33.9196	14137.5	550.221	4617.6	4907.22
1861	280.4	121760	4600.9	42215	39794		32.6807	14191.1	536.235	4638	4920.02
1862	270.13	122220	4483.5	42324	39966		31.4837	14244.8	522.552	4658.04	4932.93
1863	260.2	122670	4368.7	42433	40136		30.3263	14297.2	509.172	4677.86	4945.57
1864	250.62	123110	4256.4	42540	40303		29.2098	14348.5	496.084	4697.32	4957.93
1865	241.37	123550	4146.7	42647	40469		28.1317	14399.8	483.298	4716.67	4970.4
1866	232.43	123990	4039.4	42752	40631		27.0897	14451	470.793	4735.55	4982.98
1867	223.8	124410	3934.6	42857	40792		26.0839	14500	458.578	4754.31	4994.89
1868	215.47	124830	3832.1	42960	40950		25.1131	14549	446.632	4772.73	5006.9
1869	207.43	125250	3732	43062	41105		24.176	14597.9	434.965	4790.79	5019.01
1870	199.67	125660	3634.1	43163	41258		23.2716	14645.7	423.555	4808.62	5030.84
1871	192.18	126060	3538.5	43263	41409		22.3986	14692.3	412.413	4826.22	5042.37
1872	184.96	126450	3445.1	43361	41557		21.5571	14737.8	401.527	4843.47	5053.62
1873	177.98	126840	3353.9	43458	41702		20.7436	14783.2	390.897	4860.37	5064.95
1874	171.25	127220	3264.7	43553	41845		19.9592	14827.5	380.501	4877.04	5075.99
1875	164.76	127600	3177.7	43647	41985		19.2028	14871.8	370.361	4893.36	5087.12
1876	158.5	127970	3092.7	43740	42123		18.4732	14914.9	360.455	4909.44	5097.95
1877	152.47	128330	3009.7	43831	42258		17.7704	14956.9	350.781	4925.17	5108.48
1878	146.64	128690	2928.7	43921	42391		17.0909	14998.8	341.34	4940.68	5119.09
1879	141.03	129040	2849.5	44009	42521		16.4371	15039.6	332.11	4955.83	5129.39
1880	135.62	129380	2772.3	44095	42648		15.8065	15079.3	323.112	4970.63	5139.39
1881	130.4	129710	2696.9	44180	42773		15.1981	15117.7	314.324	4985.2	5149.08
1882	125.37	130040	2623.4	44263	42895		14.6119	15156.2	305.758	4999.42	5158.85
1883	120.52	130360	2551.6	44344	43014		14.0466	15193.5	297.389	5013.29	5168.3
1884	115.84	130670	2481.5	44424	43131		13.5012	15229.6	289.219	5026.92	5177.44
1885	111.34	130980	2413.2	44502	43244		12.9767	15265.7	281.259	5040.09	5186.66
1886	107	131280	2346.5	44578	43356		12.4709	15300.7	273.485	5053.15	5195.55
1887	102.82	131570	2281.5	44652	43464		11.9837	15334.5	265.909	5065.73	5204.13
1888	98.797	131860	2218	44724	43570		11.5148	15368.3	258.508	5078.09	5212.77
1889	94.918	132130	2156.2	44795	43673		11.0627	15399.8	251.305	5090.09	5220.71
1890	91.183	132400	2095.8	44863	43773		10.6274	15431.2	244.266	5101.75	5228.71
1891	0	132660	2037	44900	43886		0	15461.5	237.413	5114.92	5232.98
1892	0	132920	1979.6	44966	43980		0	15491.8	230.723	5125.87	5240.85
1893	0	133170	1923.7	45030	44071		0	15521	224.207	5136.48	5248.4
1894	0	133400	1869.2	45091	44160		0	15547.8	217.855	5146.85	5255.21
1895	0	133640	1816.1	45151	44246		0	15575.8	211.667	5156.88	5262.47
1896	0	133860	1764.3	45208	44329		0	15601.4	205.629	5166.55	5269.01
1897	0	134080	1713.9	45263	44409		0	15627	199.755	5175.87	5275.6
1898	0	134280	1664.7	45316	44486		0	15650.3	194.021	5184.85	5281.46
1899	0	134480	1616.8	45367	44561		0	15673.7	188.438	5193.59	5287.37
1900	0	134680	1570.1	45415	44633		0	15697	182.995	5201.98	5293.32
1901	0	134860	1524.7	45462	44701		0	15717.9	177.704	5209.91	5298.55
1902	0	135040	1480.4	45506	44767		0	15738.9	172.541	5217.6	5303.82
1903	0	135210	1437.3	45547	44831		0	15758.7	167.517	5225.06	5308.75
1904	0	135370	1395.3	45587	44891		0	15777.4	162.622	5232.05	5313.34
1905	0	135520	1354.4	45624	44949		0	15794.9	157.855	5238.81	5317.58
1906	0	135660	1314.6	45659	45003		0	15811.2	153.217	5245.1	5321.47
1907	0	135800	1275.9	45691	45055		0	15827.5	148.706	5251.17	5325.4
1908	0	135930	1238.1	45722	45104		0	15842.7	144.301	5256.88	5328.99
1909	0	136050	1201.4	45749	45150		0	15856.6	140.023	5262.24	5332.22
1910	0	136160	1165.7	45775	45193		0	15869.5	135.862	5267.25	5335.11
1911	0	136260	1130.9	45797	45233		0	15881.1	131.807	5271.91	5337.64
1912	0	136360	1097.1	45818	45271		0	15892.8	127.867	5276.34	5340.21
1913	0	136440	1064.2	45836	45305		0	15902.1	124.033	5280.3	5342.04
1914	0	136520	1032.1	45852	45337		0	15911.4	120.291	5284.03	5343.9
1915	0	136590	1001	45865	45365		0	15919.6	116.667	5287.3	5345.42
1916	0	136660	970.7	45875	45391		0	15927.7	113.135	5290.33	5346.96
1917	0	136710	941.24	45884	45414		0	15933.6	109.702	5293.01	5347.76
1918	0	136760	912.58	45889	45434		0	15939.4	106.361	5295.34	5348.59
1919	0	136790	884.72	45893	45451		0	15942.9	103.114	5297.32	5348.67
1920	0	136820	857.63	45893	45465		0	15946.4	99.9569	5298.95	5348.78
1921	0	136840	831.3	45891	45476		0	15948.7	96.8881	5300.23	5348.54
1922	0	136860	805.7	45887	45485		0	15951	93.9044	5301.28	5348.32
1923	0	136860	780.82	45880	45490		0	15951	91.0047	5301.86	5347.35
1924	0	136860	756.63	45871	45493		0	15951	88.1853	5302.21	5346.41
1925	0	136840	733.14	45859	45493		0	15948.7	85.4476	5302.21	5344.72
1926	0	136820	710.3	45844	45489		0	15946.4	82.7855	5301.75	5343.06
1927	0	136790	688.12	45827	45483		0	15942.9	80.2005	5301.05	5341.03
1928	0	136760	666.57	45807	45474		0	15939.4	77.6888	5300	5339.03
1929	0	136710	645.63	45785	45463		0	15933.6	75.2483	5298.72	5336.27
1930	0	136660	625.3	45760	45448		0	15927.7	72.8788	5296.97	5333.54
1931	0	136590	605.55	45733	45431		0	15919.6	70.5769	5294.99	5330.05
1932	0	136520	586.37	45703	45410		0	15911.4	68.3415	5292.54	5326.59
1933	0	136440	567.75	45671	45387		0	15902.1	66.1713	5289.86	5322.76
1934	0	136360	549.67	45636	45361		0	15892.8	64.0641	5286.83	5318.95
1935	0	136260	532.11	45598	45332		0	15881.1	62.0175	5283.45	5314.38
1936	0	136160	515.07	45558	45300		0	15869.5	60.0315	5279.72	5309.83
1937	0	136050	498.54	45515	45266		0	15856.6	58.1049	5275.76	5304.92
1938	0	135930	482.48	45470	45229		0	15842.7	56.2331	5271.45	5299.63
1939	0	135800	466.91	45422	45188		0	15827.5	54.4184	5266.67	5293.97
1940	0	135660	451.79	45371	45146		0	15811.2	52.6562	5261.77	5287.95
1941	0	135520	437.13	45318	45100		0	15794.9	50.9476	5256.41	5281.94
1942	0	135370	422.9	45263	45051		0	15777.4	49.289	5250.7	5275.56
1943	0	135210	409.1	45205	45000		0	15758.7	47.6807	5244.76	5268.81
1944	0	135040	395.71	45144	44946		0	15738.9	46.12	5238.46	5261.68
1945	0	134860	382.73	45081	44890		0	15717.9	44.6072	5231.93	5254.19
1946	0	134680	370.14	45015	44830		0	15697	43.1399	5224.94	5246.7
1947	0	134480	357.93	44947	44768		0	15673.7	41.7168	5217.72	5238.46
1948	0	134280	346.09	44876	44703		0	15650.3	40.3368	5210.14	5230.23
1949	0	134080	334.62	44803	44636		0	15627	39	5202.33	5222.01
1950	0	133860	323.49	44728	44566		0	15601.4	37.7028	5194.17	5213.03
1951	0	133640	312.71	44649	44493		0	15575.8	36.4464	5185.66	5204.07
1952	0	133400	302.25	44569	44418		0	15547.8	35.2273	5176.92	5194.34
1953	0	133170	292.13	44486	44340		0	15521	34.0478	5167.83	5185.01
1954	0	132920	282.31	44400	44259		0	15491.8	32.9033	5158.39	5174.91
1955	0	132660	272.8	44312	44176		0	15461.5	31.7949	5148.72	5164.44
1956	0	132400	263.59	44222	44090		0	15431.2	30.7214	5138.69	5153.99
1957	0	132130	254.66	44129	44002		0	15399.8	29.6807	5128.44	5143.15
1958	0	131860	246.02	44034	43911		0	15368.3	28.6737	5117.83	5132.32
1959	0	131570	237.65	43936	43818		0	15334.5	27.6981	5106.99	5120.73
1960	0	131280	229.54	43836	43722		0	15300.7	26.7529	5095.8	5109.15
1961	0	130980	221.68	43734	43623		0	15265.7	25.8368	5084.27	5097.19
1962	0	130670	214.08	43629	43522		0	15229.6	24.951	5072.49	5084.85
1963	0	130360	206.72	43522	43419		0	15193.5	24.0932	5060.49	5072.52
1964	0	130040	199.59	43413	43313		0	15156.2	23.2622	5048.14	5059.81
1965	0	129710	192.7	43302	43205		0	15117.7	22.4592	5035.55	5046.72
1966	0	129380	186.02	43188	43095		0	15079.3	21.6807	5022.73	5033.64
1967	0	129040	179.56	43072	42982		0	15039.6	20.9277	5009.56	5020.18
1968	0	128690	173.31	42953	42867		0	14998.8	20.1993	4996.15	5006.34
1969	0	128330	167.26	42833	42749		0	14956.9	19.4942	4982.4	4992.12
1970	0	127970	161.4	42710	42629		0	14914.9	18.8112	4968.41	4977.91
1971	0	127600	155.74	42585	42507		0	14871.8	18.1515	4954.2	4963.32
1972	0	127220	150.26	42458	42383		0	14827.5	17.5128	4939.74	4948.34
1973	0	126840	144.96	42329	42256		0	14783.2	16.8951	4924.94	4933.37
1974	0	126450	139.84	42197	42128		0	14737.8	16.2984	4910.02	4918.02
1975	0	126060	134.89	42064	41997		0	14692.3	15.7214	4894.76	4902.68
1976	0	125660	130.09	41928	41863		0	14645.7	15.162	4879.14	4886.95
1977	0	125250	125.46	41791	41728		0	14597.9	14.6224	4863.4	4870.84
1978	0	124830	120.98	41651	41591		0	14549	14.1002	4847.44	4854.35
1979	0	124410	116.65	41510	41451		0	14500	13.5956	4831.12	4837.87
1980	0	123990	112.47	41366	41310		0	14451	13.1084	4814.69	4821.39
1981	0	123550	108.43	41220	41166		0	14399.8	12.6375	4797.9	4804.13
1982	0	123110	104.52	41073	41021		0	14348.5	12.1818	4781	4786.89
1983	0	122670	100.74	40923	40873		0	14297.2	11.7413	4763.75	4769.65
1984	0	122220	97.093	40772	40723		0	14244.8	11.3162	4746.27	4752.02
1985	0	121760	93.568	40619	40572		0	14191.1	10.9054	4728.67	4734.02
1986	0	121300	90.162	40464	40419		0	14137.5	10.5084	4710.84	4716.01
1987	0	120830	86.873	40307	40263		0	14082.8	10.1251	4692.66	4697.63
1988	0	120360	83.696	40148	40106		0	14028	9.75478	4674.36	4679.24
1989	0	119880	80.629	39987	39947		0	13972	9.39732	4655.83	4660.48
1990	0	119400	77.666	39825	39786		0	13916.1	9.05198	4637.06	4641.71
1991	0	118910	74.806	39661	39624		0	13859	8.71865	4618.18	4622.56
1992	0	118410	72.044	39495	39459		0	13800.7	8.39674	4598.95	4603.03
1993	0	117910	69.378	39328	39293		0	13742.4	8.08601	4579.6	4583.5
1994	0	117410	66.805	39159	39126		0	13684.1	7.78613	4560.14	4563.98
1995	0	116900	64.321	38988	38956		0	13624.7	7.49662	4540.33	4544.07
1996	0	116390	61.924	38816	38785		0	13565.3	7.21725	4520.4	4524.16
1997	0	115870	0	38623	38623		0	13504.7	0	4501.52	4501.55
1998	0	115340	0	38448	38448		0	13442.9	0	4481.12	4480.96
[truncated: 1 more rows]

## Sheet: Sas-expressing
Particle Size (nm)	Concentration (particles / ml)	Concentration (particles / ml)	Concentration (particles / ml)	Concentration Average (particles / ml)	Standard Error		Concentration (particles / ml)	Concentration (particles / ml)	Concentration (particles / ml)	Standard Error	Mean
0	0	0	0	0	0		0	0	0	0	0
1	0	0	0	0	0		0	0	0	0	0
2	0	0	0	0	0		0	0	0	0	0
3	0	0	0	0	0		0	0	0	0	0
4	0	0	0	0	0		0	0	0	0	0
5	0	0	0	0	0		0	0	0	0	0
6	0	0	0	0	0		0	0	0	0	0
7	0	0	0	0	0		0	0	0	0	0
8	0	0	0	0	0		0	0	0	0	0
9	0	0	0	0	0		0	0	0	0	0
10	0	0	36000	12000	12000		0	0	8256.88	2752.29	2752.29
11	68200	145000	739000	317000	212000		15642.2	33256.9	169495	72706.4	72798.2
12	901000	1910000	4970000	2590000	1220000		206651	438073	1.13991e+06	594037	594878
13	5000000	10400000	14900000	10100000	2850000		1.14679e+06	2.38532e+06	3.41743e+06	2.31651e+06	2.31651e+06
14	14700000	26900000	28400000	23300000	4340000		3.37156e+06	6.16972e+06	6.51376e+06	5.34404e+06	5.35168e+06
15	30000000	41500000	51800000	41100000	6280000		6.88073e+06	9.51835e+06	1.18807e+07	9.42661e+06	9.42661e+06
16	49300000	57200000	94600000	67000000	14000000		1.13073e+07	1.31193e+07	2.16972e+07	1.5367e+07	1.53746e+07
17	73300000	93600000	146000000	104000000	21700000		1.68119e+07	2.14679e+07	3.34862e+07	2.38532e+07	2.3922e+07
18	118000000	153000000	192000000	154000000	21300000		2.70642e+07	3.50917e+07	4.40367e+07	3.53211e+07	3.53976e+07
19	191000000	219000000	245000000	218000000	15400000		4.38073e+07	5.02294e+07	5.61927e+07	50000000	5.00765e+07
20	275000000	293000000	328000000	299000000	15700000		6.30734e+07	6.72018e+07	7.52294e+07	6.8578e+07	6.85015e+07
21	358000000	385000000	446000000	396000000	26000000		8.21101e+07	8.83028e+07	1.02294e+08	9.08257e+07	9.09021e+07
22	454000000	504000000	587000000	515000000	38700000		1.04128e+08	1.15596e+08	1.34633e+08	1.18119e+08	1.18119e+08
23	574000000	641000000	743000000	653000000	49100000		1.31651e+08	1.47018e+08	1.70413e+08	1.49771e+08	1.49694e+08
24	703000000	775000000	903000000	794000000	58500000		1.61239e+08	1.77752e+08	2.0711e+08	1.8211e+08	1.82034e+08
25	827000000	909000000	1060000000	932000000	68100000		1.89679e+08	2.08486e+08	2.43119e+08	2.13761e+08	2.13761e+08
26	952000000	1070000000	1220000000	1080000000	76900000		2.18349e+08	2.45413e+08	2.79817e+08	2.47706e+08	2.47859e+08
27	1090000000	1280000000	1390000000	1250000000	86400000		2.5e+08	2.93578e+08	3.18807e+08	2.86697e+08	2.87462e+08
28	1270000000	1520000000	1580000000	1450000000	95700000		2.91284e+08	3.48624e+08	3.62385e+08	3.32569e+08	3.34098e+08
29	1470000000	1750000000	1790000000	1670000000	101000000		3.37156e+08	4.01376e+08	4.1055e+08	3.83028e+08	3.83028e+08
30	1680000000	1970000000	2000000000	1880000000	104000000		3.85321e+08	4.51835e+08	4.58716e+08	4.31193e+08	4.31957e+08
31	1890000000	2190000000	2240000000	2110000000	110000000		4.33486e+08	5.02294e+08	5.13761e+08	4.83945e+08	4.8318e+08
32	2100000000	2420000000	2510000000	2350000000	124000000		4.81651e+08	5.55046e+08	5.75688e+08	5.38991e+08	5.37462e+08
33	2330000000	2670000000	2810000000	2600000000	141000000		5.34404e+08	6.12385e+08	6.44495e+08	5.9633e+08	5.97095e+08
34	2580000000	2910000000	3120000000	2870000000	155000000		5.91743e+08	6.67431e+08	7.15596e+08	6.58257e+08	6.58257e+08
35	2850000000	3140000000	3420000000	3140000000	165000000		6.5367e+08	7.20183e+08	7.84404e+08	7.20183e+08	7.19419e+08
36	3130000000	3370000000	3720000000	3410000000	171000000		7.1789e+08	7.72936e+08	8.53211e+08	7.8211e+08	7.81346e+08
37	3410000000	3600000000	4000000000	3670000000	175000000		7.8211e+08	8.25688e+08	9.17431e+08	8.41743e+08	8.41743e+08
38	3680000000	3850000000	4280000000	3940000000	179000000		8.44037e+08	8.83028e+08	9.81651e+08	9.0367e+08	9.02905e+08
39	3940000000	4120000000	4540000000	4200000000	180000000		9.0367e+08	9.44954e+08	1.04128e+09	9.63303e+08	9.63303e+08
40	4180000000	4410000000	4800000000	4470000000	179000000		9.58716e+08	1.01147e+09	1.10092e+09	1.02523e+09	1.0237e+09
41	4430000000	4730000000	5040000000	4730000000	179000000		1.01606e+09	1.08486e+09	1.15596e+09	1.08486e+09	1.08563e+09
42	4660000000	5050000000	5280000000	5000000000	180000000		1.06881e+09	1.15826e+09	1.21101e+09	1.14679e+09	1.14602e+09
43	4890000000	5370000000	5510000000	5250000000	188000000		1.12156e+09	1.23165e+09	1.26376e+09	1.20413e+09	1.20566e+09
44	5100000000	5660000000	5730000000	5500000000	201000000		1.16972e+09	1.29817e+09	1.31422e+09	1.26147e+09	1.2607e+09
45	5290000000	5940000000	5960000000	5730000000	218000000		1.2133e+09	1.36239e+09	1.36697e+09	1.31422e+09	1.31422e+09
46	5480000000	6170000000	6190000000	5950000000	235000000		1.25688e+09	1.41514e+09	1.41972e+09	1.36468e+09	1.36391e+09
47	5660000000	6380000000	6410000000	6150000000	246000000		1.29817e+09	1.4633e+09	1.47018e+09	1.41055e+09	1.41055e+09
48	5850000000	6560000000	6630000000	6340000000	248000000		1.34174e+09	1.50459e+09	1.52064e+09	1.45413e+09	1.45566e+09
49	6060000000	6700000000	6830000000	6530000000	239000000		1.38991e+09	1.5367e+09	1.56651e+09	1.49771e+09	1.49771e+09
50	6280000000	6830000000	7010000000	6710000000	221000000		1.44037e+09	1.56651e+09	1.6078e+09	1.53899e+09	1.53823e+09
51	6510000000	6950000000	7180000000	6880000000	198000000		1.49312e+09	1.59404e+09	1.64679e+09	1.57798e+09	1.57798e+09
52	6740000000	7060000000	7340000000	7050000000	174000000		1.54587e+09	1.61927e+09	1.68349e+09	1.61697e+09	1.61621e+09
53	6960000000	7160000000	7480000000	7200000000	153000000		1.59633e+09	1.6422e+09	1.7156e+09	1.65138e+09	1.65138e+09
54	7150000000	7260000000	7600000000	7340000000	136000000		1.63991e+09	1.66514e+09	1.74312e+09	1.68349e+09	1.68272e+09
55	7320000000	7360000000	7710000000	7460000000	123000000		1.6789e+09	1.68807e+09	1.76835e+09	1.71101e+09	1.71177e+09
56	7470000000	7460000000	7790000000	7570000000	110000000		1.7133e+09	1.71101e+09	1.7867e+09	1.73624e+09	1.737e+09
57	7590000000	7550000000	7860000000	7670000000	96000000		1.74083e+09	1.73165e+09	1.80275e+09	1.75917e+09	1.75841e+09
58	7690000000	7640000000	7910000000	7750000000	81200000		1.76376e+09	1.75229e+09	1.81422e+09	1.77752e+09	1.77676e+09
59	7770000000	7730000000	7950000000	7820000000	66400000		1.78211e+09	1.77294e+09	1.82339e+09	1.79358e+09	1.79281e+09
60	7840000000	7810000000	7980000000	7880000000	53200000		1.79817e+09	1.79128e+09	1.83028e+09	1.80734e+09	1.80657e+09
61	7890000000	7880000000	8010000000	7930000000	43400000		1.80963e+09	1.80734e+09	1.83716e+09	1.81881e+09	1.81804e+09
62	7920000000	7940000000	8040000000	7970000000	37800000		1.81651e+09	1.8211e+09	1.84404e+09	1.82798e+09	1.82722e+09
63	7950000000	7980000000	8070000000	8000000000	36200000		1.82339e+09	1.83028e+09	1.85092e+09	1.83486e+09	1.83486e+09
64	7960000000	8000000000	8090000000	8020000000	36400000		1.82569e+09	1.83486e+09	1.8555e+09	1.83945e+09	1.83869e+09
65	7970000000	8000000000	8090000000	8020000000	36400000		1.82798e+09	1.83486e+09	1.8555e+09	1.83945e+09	1.83945e+09
66	7970000000	7990000000	8080000000	8010000000	34600000		1.82798e+09	1.83257e+09	1.85321e+09	1.83716e+09	1.83792e+09
67	7970000000	7960000000	8060000000	7990000000	30900000		1.82798e+09	1.82569e+09	1.84862e+09	1.83257e+09	1.8341e+09
68	7970000000	7910000000	8010000000	7960000000	27700000		1.82798e+09	1.81422e+09	1.83716e+09	1.82569e+09	1.82645e+09
69	7960000000	7860000000	7950000000	7930000000	31000000		1.82569e+09	1.80275e+09	1.82339e+09	1.81881e+09	1.81728e+09
70	7960000000	7810000000	7870000000	7880000000	44100000		1.82569e+09	1.79128e+09	1.80505e+09	1.80734e+09	1.80734e+09
71	7950000000	7740000000	7790000000	7830000000	63700000		1.82339e+09	1.77523e+09	1.7867e+09	1.79587e+09	1.79511e+09
72	7940000000	7680000000	7690000000	7770000000	85900000		1.8211e+09	1.76147e+09	1.76376e+09	1.78211e+09	1.78211e+09
73	7920000000	7610000000	7590000000	7710000000	108000000		1.81651e+09	1.74541e+09	1.74083e+09	1.76835e+09	1.76758e+09
74	7890000000	7540000000	7500000000	7640000000	127000000		1.80963e+09	1.72936e+09	1.72018e+09	1.75229e+09	1.75306e+09
75	7850000000	7460000000	7400000000	7570000000	141000000		1.80046e+09	1.71101e+09	1.69725e+09	1.73624e+09	1.73624e+09
76	7800000000	7380000000	7320000000	7500000000	151000000		1.78899e+09	1.69266e+09	1.6789e+09	1.72018e+09	1.72018e+09
77	7730000000	7300000000	7240000000	7420000000	156000000		1.77294e+09	1.67431e+09	1.66055e+09	1.70183e+09	1.7026e+09
78	7650000000	7210000000	7160000000	7340000000	156000000		1.75459e+09	1.65367e+09	1.6422e+09	1.68349e+09	1.68349e+09
79	7560000000	7130000000	7090000000	7260000000	153000000		1.73394e+09	1.63532e+09	1.62615e+09	1.66514e+09	1.66514e+09
80	7470000000	7040000000	7010000000	7170000000	148000000		1.7133e+09	1.61468e+09	1.6078e+09	1.6445e+09	1.64526e+09
81	7360000000	6940000000	6930000000	7080000000	141000000		1.68807e+09	1.59174e+09	1.58945e+09	1.62385e+09	1.62309e+09
82	7240000000	6840000000	6850000000	6980000000	133000000		1.66055e+09	1.56881e+09	1.5711e+09	1.60092e+09	1.60015e+09
83	7130000000	6740000000	6760000000	6880000000	124000000		1.63532e+09	1.54587e+09	1.55046e+09	1.57798e+09	1.57722e+09
84	7000000000	6640000000	6670000000	6770000000	115000000		1.6055e+09	1.52294e+09	1.52982e+09	1.55275e+09	1.55275e+09
85	6870000000	6540000000	6570000000	6660000000	106000000		1.57569e+09	1500000000	1.50688e+09	1.52752e+09	1.52752e+09
86	6740000000	6430000000	6470000000	6550000000	97000000		1.54587e+09	1.47477e+09	1.48394e+09	1.50229e+09	1.50153e+09
87	6600000000	6310000000	6370000000	6430000000	87100000		1.51376e+09	1.44725e+09	1.46101e+09	1.47477e+09	1.47401e+09
88	6450000000	6200000000	6260000000	6310000000	76800000		1.47936e+09	1.42202e+09	1.43578e+09	1.44725e+09	1.44572e+09
89	6310000000	6080000000	6160000000	6180000000	66000000		1.44725e+09	1.3945e+09	1.41284e+09	1.41743e+09	1.4182e+09
90	6160000000	5960000000	6050000000	6060000000	55200000		1.41284e+09	1.36697e+09	1.38761e+09	1.38991e+09	1.38914e+09
91	6000000000	5850000000	5940000000	5930000000	44900000		1.37615e+09	1.34174e+09	1.36239e+09	1.36009e+09	1.36009e+09
92	5850000000	5730000000	5830000000	5800000000	35900000		1.34174e+09	1.31422e+09	1.33716e+09	1.33028e+09	1.33104e+09
93	5690000000	5620000000	5710000000	5680000000	29600000		1.30505e+09	1.28899e+09	1.30963e+09	1.30275e+09	1.30122e+09
94	5540000000	5510000000	5600000000	5550000000	27200000		1.27064e+09	1.26376e+09	1.2844e+09	1.27294e+09	1.27294e+09
95	5400000000	5400000000	5490000000	5430000000	28900000		1.23853e+09	1.23853e+09	1.25917e+09	1.24541e+09	1.24541e+09
96	5260000000	5310000000	5380000000	5310000000	33000000		1.20642e+09	1.21789e+09	1.23394e+09	1.21789e+09	1.21942e+09
97	5130000000	5210000000	5260000000	5200000000	37800000		1.17661e+09	1.19495e+09	1.20642e+09	1.19266e+09	1.19266e+09
98	5010000000	5120000000	5150000000	5090000000	42300000		1.14908e+09	1.17431e+09	1.18119e+09	1.16743e+09	1.1682e+09
99	4900000000	5040000000	5040000000	4990000000	46000000		1.12385e+09	1.15596e+09	1.15596e+09	1.1445e+09	1.14526e+09
100	4800000000	4960000000	4930000000	4900000000	48600000		1.10092e+09	1.13761e+09	1.13073e+09	1.12385e+09	1.12309e+09
101	4710000000	4880000000	4820000000	4800000000	50100000		1.08028e+09	1.11927e+09	1.1055e+09	1.10092e+09	1.10168e+09
102	4620000000	4800000000	4720000000	4710000000	50500000		1.05963e+09	1.10092e+09	1.08257e+09	1.08028e+09	1.08104e+09
103	4550000000	4720000000	4620000000	4630000000	49900000		1.04358e+09	1.08257e+09	1.05963e+09	1.06193e+09	1.06193e+09
104	4480000000	4640000000	4520000000	4550000000	48600000		1.02752e+09	1.06422e+09	1.0367e+09	1.04358e+09	1.04281e+09
105	4410000000	4560000000	4430000000	4470000000	46900000		1.01147e+09	1.04587e+09	1.01606e+09	1.02523e+09	1.02446e+09
106	4350000000	4480000000	4340000000	4390000000	45400000		9.97706e+08	1.02752e+09	9.95413e+08	1.00688e+09	1.00688e+09
107	4300000000	4400000000	4250000000	4320000000	44400000		9.86239e+08	1.00917e+09	9.74771e+08	9.90826e+08	9.90061e+08
108	4240000000	4320000000	4160000000	4240000000	44400000		9.72477e+08	9.90826e+08	9.54128e+08	9.72477e+08	9.72477e+08
109	4190000000	4230000000	4080000000	4170000000	45700000		9.61009e+08	9.70183e+08	9.3578e+08	9.56422e+08	9.55657e+08
110	4130000000	4150000000	4000000000	4090000000	48200000		9.47248e+08	9.51835e+08	9.17431e+08	9.38073e+08	9.38838e+08
111	4080000000	4070000000	3920000000	4020000000	51700000		9.3578e+08	9.33486e+08	8.99083e+08	9.22018e+08	9.22783e+08
112	4020000000	3990000000	3840000000	3950000000	55900000		9.22018e+08	9.15138e+08	8.80734e+08	9.05963e+08	9.05963e+08
113	3960000000	3910000000	3760000000	3880000000	60500000		9.08257e+08	8.96789e+08	8.62385e+08	8.89908e+08	8.89144e+08
114	3910000000	3830000000	3680000000	3810000000	65400000		8.96789e+08	8.7844e+08	8.44037e+08	8.73853e+08	8.73089e+08
115	3850000000	3750000000	3610000000	3740000000	70400000		8.83028e+08	8.60092e+08	8.27982e+08	8.57798e+08	8.57034e+08
116	3790000000	3680000000	3530000000	3670000000	75400000		8.69266e+08	8.44037e+08	8.09633e+08	8.41743e+08	8.40979e+08
117	3730000000	3610000000	3450000000	3590000000	80400000		8.55505e+08	8.27982e+08	7.91284e+08	8.23394e+08	8.24924e+08
118	3670000000	3530000000	3370000000	3530000000	85400000		8.41743e+08	8.09633e+08	7.72936e+08	8.09633e+08	8.08104e+08
119	3610000000	3460000000	3300000000	3460000000	90300000		8.27982e+08	7.93578e+08	7.56881e+08	7.93578e+08	7.92813e+08
120	3550000000	3400000000	3220000000	3390000000	94900000		8.1422e+08	7.79817e+08	7.38532e+08	7.77523e+08	7.77523e+08
121	3490000000	3330000000	3150000000	3320000000	99200000		8.00459e+08	7.63761e+08	7.22477e+08	7.61468e+08	7.62232e+08
122	3430000000	3260000000	3070000000	3250000000	103000000		7.86697e+08	7.47706e+08	7.04128e+08	7.45413e+08	7.46177e+08
123	3370000000	3190000000	3000000000	3190000000	106000000		7.72936e+08	7.31651e+08	6.88073e+08	7.31651e+08	7.30887e+08
124	3310000000	3120000000	2940000000	3120000000	108000000		7.59174e+08	7.15596e+08	6.74312e+08	7.15596e+08	7.16361e+08
125	3250000000	3050000000	2870000000	3060000000	110000000		7.45413e+08	6.99541e+08	6.58257e+08	7.01835e+08	7.0107e+08
126	3190000000	2980000000	2810000000	3000000000	110000000		7.31651e+08	6.83486e+08	6.44495e+08	6.88073e+08	6.86544e+08
127	3130000000	2910000000	2750000000	2930000000	109000000		7.1789e+08	6.67431e+08	6.30734e+08	6.72018e+08	6.72018e+08
128	3070000000	2840000000	2700000000	2870000000	108000000		7.04128e+08	6.51376e+08	6.19266e+08	6.58257e+08	6.58257e+08
129	3010000000	2770000000	2650000000	2810000000	106000000		6.90367e+08	6.35321e+08	6.07798e+08	6.44495e+08	6.44495e+08
130	2950000000	2700000000	2600000000	2750000000	103000000		6.76606e+08	6.19266e+08	5.9633e+08	6.30734e+08	6.30734e+08
131	2880000000	2630000000	2550000000	2690000000	100000000		6.6055e+08	6.03211e+08	5.84862e+08	6.16972e+08	6.16208e+08
132	2820000000	2560000000	2510000000	2630000000	97500000		6.46789e+08	5.87156e+08	5.75688e+08	6.03211e+08	6.03211e+08
133	2760000000	2490000000	2460000000	2570000000	94700000		6.33028e+08	5.71101e+08	5.6422e+08	5.8945e+08	5.8945e+08
134	2690000000	2420000000	2420000000	2510000000	92200000		6.16972e+08	5.55046e+08	5.55046e+08	5.75688e+08	5.75688e+08
135	2630000000	2350000000	2370000000	2450000000	89800000		6.03211e+08	5.38991e+08	5.43578e+08	5.61927e+08	5.61927e+08
136	2570000000	2290000000	2330000000	2390000000	87600000		5.8945e+08	5.25229e+08	5.34404e+08	5.48165e+08	5.49694e+08
137	2510000000	2230000000	2280000000	2340000000	85400000		5.75688e+08	5.11468e+08	5.22936e+08	5.36697e+08	5.36697e+08
138	2440000000	2170000000	2240000000	2280000000	83100000		5.59633e+08	4.97706e+08	5.13761e+08	5.22936e+08	5.237e+08
139	2380000000	2110000000	2190000000	2230000000	80700000		5.45872e+08	4.83945e+08	5.02294e+08	5.11468e+08	5.10703e+08
140	2320000000	2060000000	2140000000	2170000000	77900000		5.3211e+08	4.72477e+08	4.90826e+08	4.97706e+08	4.98471e+08
141	2260000000	2010000000	2090000000	2120000000	74700000		5.18349e+08	4.61009e+08	4.79358e+08	4.86239e+08	4.86239e+08
142	2210000000	1970000000	2040000000	2070000000	71000000		5.06881e+08	4.51835e+08	4.6789e+08	4.74771e+08	4.75535e+08
143	2150000000	1930000000	1990000000	2020000000	67000000		4.93119e+08	4.42661e+08	4.56422e+08	4.63303e+08	4.64067e+08
144	2100000000	1890000000	1940000000	1980000000	62700000		4.81651e+08	4.33486e+08	4.44954e+08	4.54128e+08	4.53364e+08
145	2050000000	1860000000	1890000000	1930000000	58200000		4.70183e+08	4.26606e+08	4.33486e+08	4.42661e+08	4.43425e+08
146	2000000000	1830000000	1840000000	1890000000	53700000		4.58716e+08	4.19725e+08	4.22018e+08	4.33486e+08	4.33486e+08
147	1950000000	1800000000	1800000000	1850000000	49600000		4.47248e+08	4.12844e+08	4.12844e+08	4.24312e+08	4.24312e+08
148	1900000000	1770000000	1750000000	1810000000	46300000		4.3578e+08	4.05963e+08	4.01376e+08	4.15138e+08	4.14373e+08
149	1860000000	1750000000	1710000000	1770000000	44100000		4.26606e+08	4.01376e+08	3.92202e+08	4.05963e+08	4.06728e+08
150	1810000000	1740000000	1660000000	1740000000	43400000		4.15138e+08	3.99083e+08	3.80734e+08	3.99083e+08	3.98318e+08
151	1770000000	1720000000	1620000000	1700000000	44400000		4.05963e+08	3.94495e+08	3.7156e+08	3.89908e+08	3.90673e+08
152	1730000000	1710000000	1580000000	1670000000	47000000		3.96789e+08	3.92202e+08	3.62385e+08	3.83028e+08	3.83792e+08
153	1690000000	1690000000	1540000000	1640000000	50900000		3.87615e+08	3.87615e+08	3.53211e+08	3.76147e+08	3.76147e+08
154	1660000000	1680000000	1500000000	1610000000	55800000		3.80734e+08	3.85321e+08	3.44037e+08	3.69266e+08	3.70031e+08
155	1620000000	1670000000	1470000000	1590000000	61200000		3.7156e+08	3.83028e+08	3.37156e+08	3.64679e+08	3.63914e+08
156	1590000000	1660000000	1440000000	1560000000	66900000		3.64679e+08	3.80734e+08	3.30275e+08	3.57798e+08	3.58563e+08
157	1560000000	1650000000	1400000000	1540000000	72600000		3.57798e+08	3.7844e+08	3.21101e+08	3.53211e+08	3.52446e+08
158	1530000000	1640000000	1370000000	1520000000	78200000		3.50917e+08	3.76147e+08	3.1422e+08	3.48624e+08	3.47095e+08
159	1500000000	1630000000	1350000000	1490000000	83400000		3.44037e+08	3.73853e+08	3.09633e+08	3.41743e+08	3.42508e+08
160	1480000000	1620000000	1320000000	1470000000	88200000		3.3945e+08	3.7156e+08	3.02752e+08	3.37156e+08	3.3792e+08
161	1450000000	1610000000	1290000000	1450000000	92500000		3.32569e+08	3.69266e+08	2.95872e+08	3.32569e+08	3.32569e+08
162	1420000000	1600000000	1270000000	1430000000	96200000		3.25688e+08	3.66972e+08	2.91284e+08	3.27982e+08	3.27982e+08
163	1400000000	1590000000	1240000000	1410000000	99300000		3.21101e+08	3.64679e+08	2.84404e+08	3.23394e+08	3.23394e+08
164	1380000000	1570000000	1220000000	1390000000	102000000		3.16514e+08	3.60092e+08	2.79817e+08	3.18807e+08	3.18807e+08
165	1360000000	1560000000	1200000000	1370000000	103000000		3.11927e+08	3.57798e+08	2.75229e+08	3.1422e+08	3.14985e+08
166	1330000000	1540000000	1180000000	1350000000	105000000		3.05046e+08	3.53211e+08	2.70642e+08	3.09633e+08	3.09633e+08
167	1310000000	1520000000	1160000000	1330000000	105000000		3.00459e+08	3.48624e+08	2.66055e+08	3.05046e+08	3.05046e+08
168	1290000000	1500000000	1140000000	1310000000	105000000		2.95872e+08	3.44037e+08	2.61468e+08	3.00459e+08	3.00459e+08
169	1270000000	1480000000	1120000000	1290000000	104000000		2.91284e+08	3.3945e+08	2.56881e+08	2.95872e+08	2.95872e+08
170	1250000000	1450000000	1100000000	1270000000	102000000		2.86697e+08	3.32569e+08	2.52294e+08	2.91284e+08	2.9052e+08
171	1230000000	1430000000	1080000000	1250000000	100000000		2.8211e+08	3.27982e+08	2.47706e+08	2.86697e+08	2.85933e+08
172	1210000000	1400000000	1060000000	1230000000	98100000		2.77523e+08	3.21101e+08	2.43119e+08	2.8211e+08	2.80581e+08
173	1190000000	1380000000	1050000000	1210000000	95300000		2.72936e+08	3.16514e+08	2.40826e+08	2.77523e+08	2.76758e+08
174	1170000000	1350000000	1030000000	1190000000	92200000		2.68349e+08	3.09633e+08	2.36239e+08	2.72936e+08	2.71407e+08
175	1150000000	1320000000	1020000000	1160000000	88700000		2.63761e+08	3.02752e+08	2.33945e+08	2.66055e+08	2.6682e+08
176	1130000000	1300000000	1000000000	1140000000	85000000		2.59174e+08	2.98165e+08	2.29358e+08	2.61468e+08	2.62232e+08
177	1110000000	1270000000	987000000	1120000000	81100000		2.54587e+08	2.91284e+08	2.26376e+08	2.56881e+08	2.57416e+08
178	1090000000	1240000000	974000000	1100000000	77100000		2.5e+08	2.84404e+08	2.23394e+08	2.52294e+08	2.52599e+08
179	1070000000	1210000000	961000000	1080000000	72900000		2.45413e+08	2.77523e+08	2.20413e+08	2.47706e+08	2.47783e+08
180	1050000000	1190000000	948000000	1060000000	68600000		2.40826e+08	2.72936e+08	2.17431e+08	2.43119e+08	2.43731e+08
181	1030000000	1160000000	937000000	1040000000	64300000		2.36239e+08	2.66055e+08	2.14908e+08	2.38532e+08	2.39067e+08
182	1010000000	1130000000	925000000	1020000000	60100000		2.31651e+08	2.59174e+08	2.12156e+08	2.33945e+08	2.34327e+08
183	993000000	1110000000	914000000	1000000000	55800000		2.27752e+08	2.54587e+08	2.09633e+08	2.29358e+08	2.30657e+08
184	973000000	1080000000	903000000	986000000	51700000		2.23165e+08	2.47706e+08	2.0711e+08	2.26147e+08	2.25994e+08
185	952000000	1060000000	893000000	967000000	47700000		2.18349e+08	2.43119e+08	2.04817e+08	2.21789e+08	2.22095e+08
186	932000000	1030000000	883000000	949000000	43900000		2.13761e+08	2.36239e+08	2.02523e+08	2.17661e+08	2.17508e+08
187	912000000	1010000000	873000000	931000000	40300000		2.09174e+08	2.31651e+08	2.00229e+08	2.13532e+08	2.13685e+08
188	892000000	985000000	863000000	913000000	36900000		2.04587e+08	2.25917e+08	1.97936e+08	2.09404e+08	2.0948e+08
189	872000000	963000000	853000000	896000000	33800000		200000000	2.20872e+08	1.95642e+08	2.05505e+08	2.05505e+08
190	853000000	941000000	843000000	879000000	31000000		1.95642e+08	2.15826e+08	1.93349e+08	2.01606e+08	2.01606e+08
191	835000000	919000000	833000000	862000000	28600000		1.91514e+08	2.1078e+08	1.91055e+08	1.97706e+08	1.97783e+08
192	816000000	899000000	822000000	846000000	26400000		1.87156e+08	2.06193e+08	1.88532e+08	1.94037e+08	1.9396e+08
193	799000000	878000000	812000000	830000000	24600000		1.83257e+08	2.01376e+08	1.86239e+08	1.90367e+08	1.90291e+08
194	782000000	858000000	801000000	814000000	23100000		1.79358e+08	1.96789e+08	1.83716e+08	1.86697e+08	1.86621e+08
195	765000000	839000000	790000000	798000000	21800000		1.75459e+08	1.92431e+08	1.81193e+08	1.83028e+08	1.83028e+08
196	749000000	820000000	778000000	783000000	20700000		1.71789e+08	1.88073e+08	1.7844e+08	1.79587e+08	1.79434e+08
197	734000000	802000000	767000000	768000000	19700000		1.68349e+08	1.83945e+08	1.75917e+08	1.76147e+08	1.7607e+08
198	719000000	785000000	754000000	753000000	18900000		1.64908e+08	1.80046e+08	1.72936e+08	1.72706e+08	1.7263e+08
199	705000000	767000000	742000000	738000000	18100000		1.61697e+08	1.75917e+08	1.70183e+08	1.69266e+08	1.69266e+08
200	692000000	751000000	730000000	724000000	17300000		1.58716e+08	1.72248e+08	1.67431e+08	1.66055e+08	1.66131e+08
201	679000000	735000000	717000000	710000000	16400000		1.55734e+08	1.68578e+08	1.6445e+08	1.62844e+08	1.6292e+08
202	667000000	719000000	704000000	697000000	15600000		1.52982e+08	1.64908e+08	1.61468e+08	1.59862e+08	1.59786e+08
203	655000000	704000000	691000000	683000000	14700000		1.50229e+08	1.61468e+08	1.58486e+08	1.56651e+08	1.56728e+08
204	644000000	690000000	677000000	670000000	13800000		1.47706e+08	1.58257e+08	1.55275e+08	1.5367e+08	1.53746e+08
205	633000000	676000000	664000000	658000000	12800000		1.45183e+08	1.55046e+08	1.52294e+08	1.50917e+08	1.50841e+08
206	622000000	662000000	651000000	645000000	11900000		1.42661e+08	1.51835e+08	1.49312e+08	1.47936e+08	1.47936e+08
207	612000000	649000000	638000000	633000000	11000000		1.40367e+08	1.48853e+08	1.4633e+08	1.45183e+08	1.45183e+08
208	602000000	637000000	625000000	621000000	10100000		1.38073e+08	1.46101e+08	1.43349e+08	1.42431e+08	1.42508e+08
209	593000000	625000000	612000000	610000000	9310000		1.36009e+08	1.43349e+08	1.40367e+08	1.39908e+08	1.39908e+08
210	583000000	613000000	599000000	598000000	8630000		1.33716e+08	1.40596e+08	1.37385e+08	1.37156e+08	1.37232e+08
211	574000000	602000000	587000000	587000000	8080000		1.31651e+08	1.38073e+08	1.34633e+08	1.34633e+08	1.34786e+08
212	565000000	591000000	574000000	577000000	7670000		1.29587e+08	1.3555e+08	1.31651e+08	1.32339e+08	1.32263e+08
213	556000000	581000000	562000000	566000000	7420000		1.27523e+08	1.33257e+08	1.28899e+08	1.29817e+08	1.29893e+08
214	547000000	570000000	551000000	556000000	7310000		1.25459e+08	1.30734e+08	1.26376e+08	1.27523e+08	1.27523e+08
215	538000000	561000000	540000000	546000000	7310000		1.23394e+08	1.2867e+08	1.23853e+08	1.25229e+08	1.25306e+08
216	529000000	551000000	529000000	536000000	7390000		1.2133e+08	1.26376e+08	1.2133e+08	1.22936e+08	1.23012e+08
217	520000000	542000000	518000000	527000000	7530000		1.19266e+08	1.24312e+08	1.18807e+08	1.20872e+08	1.20795e+08
218	511000000	532000000	508000000	517000000	7690000		1.17202e+08	1.22018e+08	1.16514e+08	1.18578e+08	1.18578e+08
219	502000000	524000000	498000000	508000000	7860000		1.15138e+08	1.20183e+08	1.1422e+08	1.16514e+08	1.16514e+08
220	493000000	515000000	489000000	499000000	8020000		1.13073e+08	1.18119e+08	1.12156e+08	1.1445e+08	1.1445e+08
221	485000000	506000000	480000000	490000000	8140000		1.11239e+08	1.16055e+08	1.10092e+08	1.12385e+08	1.12462e+08
222	476000000	498000000	471000000	482000000	8220000		1.09174e+08	1.1422e+08	1.08028e+08	1.1055e+08	1.10474e+08
223	467000000	490000000	463000000	473000000	8270000		1.0711e+08	1.12385e+08	1.06193e+08	1.08486e+08	1.08563e+08
224	459000000	481000000	455000000	465000000	8280000		1.05275e+08	1.10321e+08	1.04358e+08	1.06651e+08	1.06651e+08
225	451000000	473000000	447000000	457000000	8240000		1.0344e+08	1.08486e+08	1.02523e+08	1.04817e+08	1.04817e+08
226	442000000	465000000	440000000	449000000	8170000		1.01376e+08	1.06651e+08	1.00917e+08	1.02982e+08	1.02982e+08
227	434000000	458000000	433000000	442000000	8050000		9.95413e+07	1.05046e+08	9.93119e+07	1.01376e+08	1.013e+08
228	426000000	450000000	426000000	434000000	7910000		9.77064e+07	1.03211e+08	9.77064e+07	9.95413e+07	9.95413e+07
229	419000000	442000000	420000000	427000000	7740000		9.61009e+07	1.01376e+08	9.63303e+07	9.79358e+07	9.79358e+07
230	411000000	435000000	413000000	420000000	7540000		9.42661e+07	9.97706e+07	9.47248e+07	9.63303e+07	9.62538e+07
231	404000000	427000000	407000000	413000000	7330000		9.26606e+07	9.79358e+07	9.33486e+07	9.47248e+07	9.46483e+07
232	397000000	420000000	402000000	406000000	7090000		9.1055e+07	9.63303e+07	9.22018e+07	9.31193e+07	9.31957e+07
233	390000000	413000000	396000000	400000000	6830000		8.94495e+07	9.47248e+07	9.08257e+07	9.17431e+07	9.16667e+07
234	383000000	406000000	391000000	393000000	6560000		8.7844e+07	9.31193e+07	8.96789e+07	9.01376e+07	9.02141e+07
235	377000000	399000000	385000000	387000000	6280000		8.64679e+07	9.15138e+07	8.83028e+07	8.87615e+07	8.87615e+07
236	371000000	392000000	380000000	381000000	5990000		8.50917e+07	8.99083e+07	8.7156e+07	8.73853e+07	8.73853e+07
237	365000000	385000000	375000000	375000000	5690000		8.37156e+07	8.83028e+07	8.60092e+07	8.60092e+07	8.60092e+07
238	359000000	378000000	370000000	369000000	5380000		8.23394e+07	8.66972e+07	8.48624e+07	8.4633e+07	8.4633e+07
239	354000000	371000000	365000000	363000000	5060000		8.11927e+07	8.50917e+07	8.37156e+07	8.32569e+07	8.33333e+07
240	349000000	365000000	360000000	358000000	4730000		8.00459e+07	8.37156e+07	8.25688e+07	8.21101e+07	8.21101e+07
241	344000000	358000000	355000000	352000000	4390000		7.88991e+07	8.21101e+07	8.1422e+07	8.07339e+07	8.08104e+07
242	339000000	352000000	350000000	347000000	4050000		7.77523e+07	8.07339e+07	8.02752e+07	7.95872e+07	7.95872e+07
243	335000000	346000000	345000000	342000000	3690000		7.68349e+07	7.93578e+07	7.91284e+07	7.84404e+07	7.84404e+07
244	330000000	340000000	340000000	337000000	3320000		7.56881e+07	7.79817e+07	7.79817e+07	7.72936e+07	7.72171e+07
245	326000000	334000000	335000000	332000000	2940000		7.47706e+07	7.66055e+07	7.68349e+07	7.61468e+07	7.60703e+07
246	322000000	329000000	330000000	327000000	2540000		7.38532e+07	7.54587e+07	7.56881e+07	75000000	75000000
247	318000000	323000000	325000000	322000000	2130000		7.29358e+07	7.40826e+07	7.45413e+07	7.38532e+07	7.38532e+07
248	314000000	318000000	320000000	317000000	1710000		7.20183e+07	7.29358e+07	7.33945e+07	7.27064e+07	7.27829e+07
249	310000000	313000000	315000000	313000000	1260000		7.11009e+07	7.1789e+07	7.22477e+07	7.1789e+07	7.17125e+07
250	307000000	308000000	309000000	308000000	805000		7.04128e+07	7.06422e+07	7.08716e+07	7.06422e+07	7.06422e+07
251	303000000	303000000	304000000	303000000	364000		6.94954e+07	6.94954e+07	6.97248e+07	6.94954e+07	6.95719e+07
252	299000000	298000000	299000000	299000000	314000		6.8578e+07	6.83486e+07	6.8578e+07	6.8578e+07	6.85015e+07
253	296000000	294000000	293000000	294000000	775000		6.78899e+07	6.74312e+07	6.72018e+07	6.74312e+07	6.75076e+07
254	292000000	290000000	288000000	290000000	1290000		6.69725e+07	6.65138e+07	6.6055e+07	6.65138e+07	6.65138e+07
255	289000000	286000000	283000000	286000000	1840000		6.62844e+07	6.55963e+07	6.49083e+07	6.55963e+07	6.55963e+07
256	286000000	282000000	277000000	282000000	2390000		6.55963e+07	6.46789e+07	6.35321e+07	6.46789e+07	6.46024e+07
257	282000000	278000000	272000000	277000000	2960000		6.46789e+07	6.37615e+07	6.23853e+07	6.35321e+07	6.36086e+07
258	279000000	274000000	267000000	273000000	3520000		6.39908e+07	6.2844e+07	6.12385e+07	6.26147e+07	6.26911e+07
259	275000000	271000000	262000000	269000000	4080000		6.30734e+07	6.2156e+07	6.00917e+07	6.16972e+07	6.17737e+07
260	272000000	267000000	256000000	265000000	4630000		6.23853e+07	6.12385e+07	5.87156e+07	6.07798e+07	6.07798e+07
261	269000000	264000000	251000000	261000000	5170000		6.16972e+07	6.05505e+07	5.75688e+07	5.98624e+07	5.99388e+07
262	265000000	261000000	246000000	258000000	5690000		6.07798e+07	5.98624e+07	5.6422e+07	5.91743e+07	5.90214e+07
263	262000000	258000000	242000000	254000000	6180000		6.00917e+07	5.91743e+07	5.55046e+07	5.82569e+07	5.82569e+07
264	258000000	255000000	237000000	250000000	6640000		5.91743e+07	5.84862e+07	5.43578e+07	5.73394e+07	5.73394e+07
265	255000000	252000000	232000000	246000000	7060000		5.84862e+07	5.77982e+07	5.3211e+07	5.6422e+07	5.64985e+07
266	251000000	249000000	228000000	243000000	7450000		5.75688e+07	5.71101e+07	5.22936e+07	5.57339e+07	5.56575e+07
267	248000000	246000000	224000000	239000000	7780000		5.68807e+07	5.6422e+07	5.13761e+07	5.48165e+07	5.4893e+07
268	245000000	243000000	220000000	236000000	8070000		5.61927e+07	5.57339e+07	5.04587e+07	5.41284e+07	5.41284e+07
269	241000000	240000000	216000000	232000000	8300000		5.52752e+07	5.50459e+07	4.95413e+07	5.3211e+07	5.32875e+07
270	238000000	237000000	212000000	229000000	8470000		5.45872e+07	5.43578e+07	4.86239e+07	5.25229e+07	5.25229e+07
271	234000000	234000000	209000000	226000000	8580000		5.36697e+07	5.36697e+07	4.79358e+07	5.18349e+07	5.17584e+07
272	231000000	231000000	205000000	223000000	8630000		5.29817e+07	5.29817e+07	4.70183e+07	5.11468e+07	5.09939e+07
273	228000000	228000000	202000000	219000000	8620000		5.22936e+07	5.22936e+07	4.63303e+07	5.02294e+07	5.03058e+07
274	224000000	225000000	199000000	216000000	8550000		5.13761e+07	5.16055e+07	4.56422e+07	4.95413e+07	4.95413e+07
275	221000000	222000000	196000000	213000000	8410000		5.06881e+07	5.09174e+07	4.49541e+07	4.88532e+07	4.88532e+07
276	218000000	219000000	194000000	210000000	8210000		50000000	5.02294e+07	4.44954e+07	4.81651e+07	4.82416e+07
277	215000000	216000000	192000000	207000000	7960000		4.93119e+07	4.95413e+07	4.40367e+07	4.74771e+07	4.763e+07
278	211000000	213000000	189000000	205000000	7650000		4.83945e+07	4.88532e+07	4.33486e+07	4.70183e+07	4.68654e+07
279	208000000	210000000	187000000	202000000	7280000		4.77064e+07	4.81651e+07	4.28899e+07	4.63303e+07	4.62538e+07
280	205000000	207000000	185000000	199000000	6870000		4.70183e+07	4.74771e+07	4.24312e+07	4.56422e+07	4.56422e+07
281	202000000	203000000	184000000	196000000	6420000		4.63303e+07	4.65596e+07	4.22018e+07	4.49541e+07	4.50306e+07
282	200000000	200000000	182000000	194000000	5930000		4.58716e+07	4.58716e+07	4.17431e+07	4.44954e+07	4.44954e+07
283	197000000	197000000	180000000	191000000	5420000		4.51835e+07	4.51835e+07	4.12844e+07	4.38073e+07	4.38838e+07
284	194000000	193000000	179000000	189000000	4880000		4.44954e+07	4.42661e+07	4.1055e+07	4.33486e+07	4.32722e+07
285	191000000	190000000	178000000	186000000	4340000		4.38073e+07	4.3578e+07	4.08257e+07	4.26606e+07	4.2737e+07
286	189000000	187000000	177000000	184000000	3800000		4.33486e+07	4.28899e+07	4.05963e+07	4.22018e+07	4.22783e+07
287	186000000	183000000	175000000	182000000	3280000		4.26606e+07	4.19725e+07	4.01376e+07	4.17431e+07	4.15902e+07
288	184000000	180000000	174000000	179000000	2810000		4.22018e+07	4.12844e+07	3.99083e+07	4.1055e+07	4.11315e+07
289	182000000	177000000	173000000	177000000	2430000		4.17431e+07	4.05963e+07	3.96789e+07	4.05963e+07	4.06728e+07
290	179000000	173000000	172000000	175000000	2190000		4.1055e+07	3.96789e+07	3.94495e+07	4.01376e+07	4.00612e+07
291	177000000	170000000	171000000	173000000	2130000		4.05963e+07	3.89908e+07	3.92202e+07	3.96789e+07	3.96024e+07
292	175000000	167000000	170000000	171000000	2270000		4.01376e+07	3.83028e+07	3.89908e+07	3.92202e+07	3.91437e+07
293	173000000	164000000	169000000	169000000	2540000		3.96789e+07	3.76147e+07	3.87615e+07	3.87615e+07	3.8685e+07
294	171000000	161000000	168000000	167000000	2910000		3.92202e+07	3.69266e+07	3.85321e+07	3.83028e+07	3.82263e+07
295	169000000	158000000	167000000	165000000	3320000		3.87615e+07	3.62385e+07	3.83028e+07	3.7844e+07	3.77676e+07
296	167000000	155000000	166000000	163000000	3750000		3.83028e+07	3.55505e+07	3.80734e+07	3.73853e+07	3.73089e+07
297	165000000	153000000	165000000	161000000	4170000		3.7844e+07	3.50917e+07	3.7844e+07	3.69266e+07	3.69266e+07
298	163000000	150000000	164000000	159000000	4580000		3.73853e+07	3.44037e+07	3.76147e+07	3.64679e+07	3.64679e+07
299	161000000	147000000	163000000	157000000	4960000		3.69266e+07	3.37156e+07	3.73853e+07	3.60092e+07	3.60092e+07
300	159000000	145000000	162000000	155000000	5300000		3.64679e+07	3.32569e+07	3.7156e+07	3.55505e+07	3.56269e+07
301	158000000	143000000	161000000	154000000	5610000		3.62385e+07	3.27982e+07	3.69266e+07	3.53211e+07	3.53211e+07
302	156000000	140000000	160000000	152000000	5890000		3.57798e+07	3.21101e+07	3.66972e+07	3.48624e+07	3.48624e+07
303	154000000	138000000	158000000	150000000	6120000		3.53211e+07	3.16514e+07	3.62385e+07	3.44037e+07	3.44037e+07
304	152000000	136000000	157000000	148000000	6310000		3.48624e+07	3.11927e+07	3.60092e+07	3.3945e+07	3.40214e+07
305	150000000	134000000	155000000	147000000	6460000		3.44037e+07	3.07339e+07	3.55505e+07	3.37156e+07	3.35627e+07
306	149000000	132000000	154000000	145000000	6560000		3.41743e+07	3.02752e+07	3.53211e+07	3.32569e+07	3.32569e+07
307	147000000	130000000	152000000	143000000	6630000		3.37156e+07	2.98165e+07	3.48624e+07	3.27982e+07	3.27982e+07
308	145000000	129000000	151000000	142000000	6650000		3.32569e+07	2.95872e+07	3.4633e+07	3.25688e+07	3.24924e+07
309	143000000	127000000	149000000	140000000	6640000		3.27982e+07	2.91284e+07	3.41743e+07	3.21101e+07	3.20336e+07
310	142000000	125000000	147000000	138000000	6600000		3.25688e+07	2.86697e+07	3.37156e+07	3.16514e+07	3.16514e+07
311	140000000	124000000	146000000	136000000	6520000		3.21101e+07	2.84404e+07	3.34862e+07	3.11927e+07	3.13456e+07
312	138000000	122000000	144000000	135000000	6410000		3.16514e+07	2.79817e+07	3.30275e+07	3.09633e+07	3.08869e+07
313	136000000	121000000	142000000	133000000	6270000		3.11927e+07	2.77523e+07	3.25688e+07	3.05046e+07	3.05046e+07
314	135000000	120000000	140000000	131000000	6100000		3.09633e+07	2.75229e+07	3.21101e+07	3.00459e+07	3.01988e+07
315	133000000	118000000	138000000	130000000	5920000		3.05046e+07	2.70642e+07	3.16514e+07	2.98165e+07	2.97401e+07
316	131000000	117000000	136000000	128000000	5710000		3.00459e+07	2.68349e+07	3.11927e+07	2.93578e+07	2.93578e+07
317	129000000	116000000	134000000	126000000	5490000		2.95872e+07	2.66055e+07	3.07339e+07	2.88991e+07	2.89755e+07
318	127000000	114000000	132000000	125000000	5250000		2.91284e+07	2.61468e+07	3.02752e+07	2.86697e+07	2.85168e+07
319	126000000	113000000	130000000	123000000	5010000		2.88991e+07	2.59174e+07	2.98165e+07	2.8211e+07	2.8211e+07
320	124000000	112000000	128000000	121000000	4760000		2.84404e+07	2.56881e+07	2.93578e+07	2.77523e+07	2.78287e+07
321	122000000	111000000	126000000	120000000	4500000		2.79817e+07	2.54587e+07	2.88991e+07	2.75229e+07	2.74465e+07
322	120000000	110000000	124000000	118000000	4240000		2.75229e+07	2.52294e+07	2.84404e+07	2.70642e+07	2.70642e+07
323	119000000	108000000	122000000	116000000	3980000		2.72936e+07	2.47706e+07	2.79817e+07	2.66055e+07	2.6682e+07
324	117000000	107000000	120000000	115000000	3730000		2.68349e+07	2.45413e+07	2.75229e+07	2.63761e+07	2.62997e+07
325	115000000	106000000	117000000	113000000	3480000		2.63761e+07	2.43119e+07	2.68349e+07	2.59174e+07	2.5841e+07
326	113000000	105000000	115000000	111000000	3240000		2.59174e+07	2.40826e+07	2.63761e+07	2.54587e+07	2.54587e+07
327	112000000	104000000	113000000	110000000	3010000		2.56881e+07	2.38532e+07	2.59174e+07	2.52294e+07	2.51529e+07
328	110000000	103000000	111000000	108000000	2780000		2.52294e+07	2.36239e+07	2.54587e+07	2.47706e+07	2.47706e+07
329	108000000	101000000	110000000	106000000	2580000		2.47706e+07	2.31651e+07	2.52294e+07	2.43119e+07	2.43884e+07
330	107000000	100000000	108000000	105000000	2380000		2.45413e+07	2.29358e+07	2.47706e+07	2.40826e+07	2.40826e+07
331	105000000	98900000	106000000	103000000	2200000		2.40826e+07	2.26835e+07	2.43119e+07	2.36239e+07	2.36927e+07
332	104000000	97700000	104000000	102000000	2040000		2.38532e+07	2.24083e+07	2.38532e+07	2.33945e+07	2.33716e+07
333	102000000	96400000	102000000	100000000	1900000		2.33945e+07	2.21101e+07	2.33945e+07	2.29358e+07	2.29664e+07
334	101000000	95200000	100000000	98700000	1770000		2.31651e+07	2.18349e+07	2.29358e+07	2.26376e+07	2.26453e+07
335	99300000	93900000	98500000	97200000	1670000		2.27752e+07	2.15367e+07	2.25917e+07	2.22936e+07	2.23012e+07
336	97900000	92700000	96800000	95800000	1580000		2.24541e+07	2.12615e+07	2.22018e+07	2.19725e+07	2.19725e+07
337	96500000	91500000	95200000	94400000	1510000		2.2133e+07	2.09862e+07	2.18349e+07	2.16514e+07	2.16514e+07
338	95100000	90200000	93600000	93000000	1450000		2.18119e+07	2.06881e+07	2.14679e+07	2.13303e+07	2.13226e+07
339	93800000	89000000	92000000	91600000	1420000		2.15138e+07	2.04128e+07	2.11009e+07	2.10092e+07	2.10092e+07
340	92600000	87700000	90500000	90300000	1400000		2.12385e+07	2.01147e+07	2.07569e+07	2.0711e+07	2.07034e+07
341	91300000	86500000	89000000	88900000	1390000		2.09404e+07	1.98394e+07	2.04128e+07	2.03899e+07	2.03976e+07
342	90100000	85300000	87600000	87700000	1390000		2.06651e+07	1.95642e+07	2.00917e+07	2.01147e+07	2.0107e+07
343	89000000	84100000	86200000	86400000	1410000		2.04128e+07	1.9289e+07	1.97706e+07	1.98165e+07	1.98242e+07
344	87800000	82900000	84800000	85200000	1430000		2.01376e+07	1.90138e+07	1.94495e+07	1.95413e+07	1.95336e+07
345	86700000	81700000	83500000	84000000	1460000		1.98853e+07	1.87385e+07	1.91514e+07	1.92661e+07	1.92584e+07
346	85700000	80600000	82200000	82800000	1500000		1.9656e+07	1.84862e+07	1.88532e+07	1.89908e+07	1.89985e+07
347	84600000	79500000	80900000	81700000	1540000		1.94037e+07	1.82339e+07	1.8555e+07	1.87385e+07	1.87309e+07
348	83600000	78400000	79700000	80600000	1580000		1.91743e+07	1.79817e+07	1.82798e+07	1.84862e+07	1.84786e+07
349	82700000	77300000	78500000	79500000	1630000		1.89679e+07	1.77294e+07	1.80046e+07	1.82339e+07	1.82339e+07
350	81700000	76200000	77300000	78400000	1670000		1.87385e+07	1.74771e+07	1.77294e+07	1.79817e+07	1.79817e+07
351	80800000	75200000	76200000	77400000	1720000		1.85321e+07	1.72477e+07	1.74771e+07	1.77523e+07	1.77523e+07
352	79900000	74200000	75100000	76400000	1770000		1.83257e+07	1.70183e+07	1.72248e+07	1.75229e+07	1.75229e+07
353	79000000	73300000	74000000	75400000	1810000		1.81193e+07	1.68119e+07	1.69725e+07	1.72936e+07	1.73012e+07
354	78200000	72300000	72900000	74500000	1860000		1.79358e+07	1.65826e+07	1.67202e+07	1.70872e+07	1.70795e+07
355	77300000	71400000	71900000	73500000	1900000		1.77294e+07	1.63761e+07	1.64908e+07	1.68578e+07	1.68654e+07
356	76500000	70600000	70800000	72600000	1940000		1.75459e+07	1.61927e+07	1.62385e+07	1.66514e+07	1.6659e+07
357	75700000	69800000	69800000	71800000	1990000		1.73624e+07	1.60092e+07	1.60092e+07	1.64679e+07	1.64602e+07
358	75000000	69000000	68800000	70900000	2030000		1.72018e+07	1.58257e+07	1.57798e+07	1.62615e+07	1.62691e+07
359	74200000	68200000	67800000	70100000	2070000		1.70183e+07	1.56422e+07	1.55505e+07	1.6078e+07	1.60703e+07
360	73500000	67500000	66800000	69300000	2120000		1.68578e+07	1.54817e+07	1.53211e+07	1.58945e+07	1.58869e+07
361	72800000	66800000	65900000	68500000	2160000		1.66972e+07	1.53211e+07	1.51147e+07	1.5711e+07	1.5711e+07
362	72000000	66100000	64900000	67700000	2200000		1.65138e+07	1.51606e+07	1.48853e+07	1.55275e+07	1.55199e+07
363	71300000	65500000	63900000	66900000	2250000		1.63532e+07	1.50229e+07	1.4656e+07	1.5344e+07	1.5344e+07
364	70700000	64900000	63000000	66200000	2300000		1.62156e+07	1.48853e+07	1.44495e+07	1.51835e+07	1.51835e+07
365	70000000	64400000	62100000	65500000	2350000		1.6055e+07	1.47706e+07	1.42431e+07	1.50229e+07	1.50229e+07
366	69300000	63900000	61100000	64800000	2410000		1.58945e+07	1.4656e+07	1.40138e+07	1.48624e+07	1.48547e+07
367	68700000	63300000	60200000	64100000	2470000		1.57569e+07	1.45183e+07	1.38073e+07	1.47018e+07	1.46942e+07
368	68000000	62900000	59300000	63400000	2540000		1.55963e+07	1.44266e+07	1.36009e+07	1.45413e+07	1.45413e+07
369	67400000	62400000	58400000	62700000	2610000		1.54587e+07	1.43119e+07	1.33945e+07	1.43807e+07	1.43884e+07
370	66800000	62000000	57500000	62100000	2690000		1.53211e+07	1.42202e+07	1.31881e+07	1.42431e+07	1.42431e+07
371	66200000	61600000	56600000	61500000	2770000		1.51835e+07	1.41284e+07	1.29817e+07	1.41055e+07	1.40979e+07
372	65600000	61200000	55700000	60800000	2860000		1.50459e+07	1.40367e+07	1.27752e+07	1.3945e+07	1.39526e+07
373	65000000	60800000	54800000	60200000	2960000		1.49083e+07	1.3945e+07	1.25688e+07	1.38073e+07	1.38073e+07
374	64400000	60500000	53900000	59600000	3060000		1.47706e+07	1.38761e+07	1.23624e+07	1.36697e+07	1.36697e+07
375	63800000	60200000	53000000	59000000	3170000		1.4633e+07	1.38073e+07	1.2156e+07	1.35321e+07	1.35321e+07
376	63200000	59800000	52100000	58400000	3280000		1.44954e+07	1.37156e+07	1.19495e+07	1.33945e+07	1.33869e+07
377	62700000	59500000	51300000	57800000	3400000		1.43807e+07	1.36468e+07	1.17661e+07	1.32569e+07	1.32645e+07
378	62100000	59200000	50400000	57300000	3520000		1.42431e+07	1.3578e+07	1.15596e+07	1.31422e+07	1.31269e+07
379	61600000	58900000	49600000	56700000	3640000		1.41284e+07	1.35092e+07	1.13761e+07	1.30046e+07	1.30046e+07
380	61000000	58600000	48700000	56100000	3760000		1.39908e+07	1.34404e+07	1.11697e+07	1.2867e+07	1.2867e+07
381	60500000	58300000	47900000	55600000	3890000		1.38761e+07	1.33716e+07	1.09862e+07	1.27523e+07	1.27446e+07
382	60000000	58100000	47100000	55000000	4020000		1.37615e+07	1.33257e+07	1.08028e+07	1.26147e+07	1.263e+07
383	59400000	57800000	46300000	54500000	4140000		1.36239e+07	1.32569e+07	1.06193e+07	12500000	12500000
384	58900000	57500000	45500000	54000000	4270000		1.35092e+07	1.31881e+07	1.04358e+07	1.23853e+07	1.23777e+07
385	58400000	57200000	44700000	53400000	4390000		1.33945e+07	1.31193e+07	1.02523e+07	1.22477e+07	1.22554e+07
386	57900000	56900000	43900000	52900000	4510000		1.32798e+07	1.30505e+07	1.00688e+07	1.2133e+07	1.2133e+07
387	57400000	56600000	43100000	52400000	4630000		1.31651e+07	1.29817e+07	9.88532e+06	1.20183e+07	1.20107e+07
388	56900000	56300000	42400000	51900000	4740000		1.30505e+07	1.29128e+07	9.72477e+06	1.19037e+07	1.1896e+07
389	56400000	55900000	41600000	51300000	4850000		1.29358e+07	1.28211e+07	9.54128e+06	1.17661e+07	1.17661e+07
390	55900000	55600000	40900000	50800000	4950000		1.28211e+07	1.27523e+07	9.38073e+06	1.16514e+07	1.16514e+07
391	55500000	55300000	40200000	50300000	5050000		1.27294e+07	1.26835e+07	9.22018e+06	1.15367e+07	1.15443e+07
392	55000000	54900000	39500000	49800000	5140000		1.26147e+07	1.25917e+07	9.05963e+06	1.1422e+07	1.1422e+07
393	54500000	54500000	38800000	49300000	5230000		12500000	12500000	8.89908e+06	1.13073e+07	1.12997e+07
394	54000000	54100000	38200000	48800000	5310000		1.23853e+07	1.24083e+07	8.76147e+06	1.11927e+07	1.1185e+07
395	53600000	53700000	37500000	48300000	5380000		1.22936e+07	1.23165e+07	8.60092e+06	1.1078e+07	1.10703e+07
396	53100000	53300000	36900000	47800000	5440000		1.21789e+07	1.22248e+07	8.4633e+06	1.09633e+07	1.09557e+07
397	52700000	52900000	36300000	47300000	5500000		1.20872e+07	1.2133e+07	8.32569e+06	1.08486e+07	1.08486e+07
398	52200000	52500000	35700000	46800000	5550000		1.19725e+07	1.20413e+07	8.18807e+06	1.07339e+07	1.07339e+07
399	51800000	52000000	35100000	46300000	5590000		1.18807e+07	1.19266e+07	8.05046e+06	1.06193e+07	1.06193e+07
400	51300000	51500000	34500000	45800000	5630000		1.17661e+07	1.18119e+07	7.91284e+06	1.05046e+07	1.04969e+07
401	50900000	51000000	34000000	45300000	5650000		1.16743e+07	1.16972e+07	7.79817e+06	1.03899e+07	1.03899e+07
402	50400000	50500000	33500000	44800000	5670000		1.15596e+07	1.15826e+07	7.68349e+06	1.02752e+07	1.02752e+07
403	50000000	50000000	32900000	44300000	5680000		1.14679e+07	1.14679e+07	7.54587e+06	1.01606e+07	1.01606e+07
404	49500000	49400000	32400000	43800000	5680000		1.13532e+07	1.13303e+07	7.43119e+06	1.00459e+07	1.00382e+07
405	49100000	48900000	32000000	43300000	5670000		1.12615e+07	1.12156e+07	7.33945e+06	9.93119e+06	9.93884e+06
406	48600000	48300000	31500000	42800000	5660000		1.11468e+07	1.1078e+07	7.22477e+06	9.81651e+06	9.81651e+06
407	48200000	47700000	31000000	42300000	5640000		1.1055e+07	1.09404e+07	7.11009e+06	9.70183e+06	9.70183e+06
408	47800000	47100000	30600000	41800000	5610000		1.09633e+07	1.08028e+07	7.01835e+06	9.58716e+06	9.5948e+06
409	47300000	46500000	30200000	41300000	5570000		1.08486e+07	1.06651e+07	6.92661e+06	9.47248e+06	9.48012e+06
410	46900000	45800000	29800000	40800000	5530000		1.07569e+07	1.05046e+07	6.83486e+06	9.3578e+06	9.36544e+06
411	46400000	45200000	29400000	40300000	5480000		1.06422e+07	1.0367e+07	6.74312e+06	9.24312e+06	9.25076e+06
412	46000000	44500000	29000000	39800000	5430000		1.05505e+07	1.02064e+07	6.65138e+06	9.12844e+06	9.13609e+06
413	45500000	43900000	28700000	39300000	5370000		1.04358e+07	1.00688e+07	6.58257e+06	9.01376e+06	9.02905e+06
414	45100000	43200000	28300000	38900000	5300000		1.0344e+07	9.90826e+06	6.49083e+06	8.92202e+06	8.91437e+06
415	44600000	42500000	28000000	38400000	5230000		1.02294e+07	9.74771e+06	6.42202e+06	8.80734e+06	8.79969e+06
416	44100000	41800000	27600000	37900000	5150000		1.01147e+07	9.58716e+06	6.33028e+06	8.69266e+06	8.67737e+06
417	43700000	41100000	27300000	37400000	5070000		1.00229e+07	9.42661e+06	6.26147e+06	8.57798e+06	8.57034e+06
418	43200000	40400000	27000000	36900000	4990000		9.90826e+06	9.26606e+06	6.19266e+06	8.4633e+06	8.45566e+06
419	42800000	39700000	26800000	36400000	4900000		9.81651e+06	9.1055e+06	6.14679e+06	8.34862e+06	8.35627e+06
420	42300000	39000000	26500000	35900000	4810000		9.70183e+06	8.94495e+06	6.07798e+06	8.23394e+06	8.24159e+06
421	41800000	38300000	26200000	35400000	4720000		9.58716e+06	8.7844e+06	6.00917e+06	8.11927e+06	8.12691e+06
422	41300000	37500000	25900000	34900000	4630000		9.47248e+06	8.60092e+06	5.94037e+06	8.00459e+06	8.00459e+06
423	40800000	36800000	25700000	34500000	4530000		9.3578e+06	8.44037e+06	5.8945e+06	7.91284e+06	7.89755e+06
424	40400000	36100000	25500000	34000000	4430000		9.26606e+06	8.27982e+06	5.84862e+06	7.79817e+06	7.79817e+06
425	39900000	35400000	25200000	33500000	4330000		9.15138e+06	8.11927e+06	5.77982e+06	7.68349e+06	7.68349e+06
426	39400000	34700000	25000000	33000000	4230000		9.0367e+06	7.95872e+06	5.73394e+06	7.56881e+06	7.57645e+06
427	38900000	34000000	24800000	32600000	4130000		8.92202e+06	7.79817e+06	5.68807e+06	7.47706e+06	7.46942e+06
428	38400000	33300000	24600000	32100000	4030000		8.80734e+06	7.63761e+06	5.6422e+06	7.36239e+06	7.36239e+06
429	37900000	32600000	24400000	31600000	3940000		8.69266e+06	7.47706e+06	5.59633e+06	7.24771e+06	7.25535e+06
430	37400000	31900000	24200000	31100000	3840000		8.57798e+06	7.31651e+06	5.55046e+06	7.13303e+06	7.14832e+06
431	36900000	31200000	24000000	30700000	3740000		8.4633e+06	7.15596e+06	5.50459e+06	7.04128e+06	7.04128e+06
432	36400000	30500000	23800000	30200000	3640000		8.34862e+06	6.99541e+06	5.45872e+06	6.92661e+06	6.93425e+06
433	35900000	29900000	23600000	29800000	3550000		8.23394e+06	6.8578e+06	5.41284e+06	6.83486e+06	6.83486e+06
434	35400000	29200000	23400000	29300000	3450000		8.11927e+06	6.69725e+06	5.36697e+06	6.72018e+06	6.72783e+06
435	34900000	28600000	23200000	28900000	3360000		8.00459e+06	6.55963e+06	5.3211e+06	6.62844e+06	6.62844e+06
436	34400000	27900000	23000000	28400000	3270000		7.88991e+06	6.39908e+06	5.27523e+06	6.51376e+06	6.52141e+06
437	33800000	27300000	22900000	28000000	3190000		7.75229e+06	6.26147e+06	5.25229e+06	6.42202e+06	6.42202e+06
438	33300000	26700000	22700000	27600000	3100000		7.63761e+06	6.12385e+06	5.20642e+06	6.33028e+06	6.32263e+06
439	32800000	26100000	22500000	27200000	3020000		7.52294e+06	5.98624e+06	5.16055e+06	6.23853e+06	6.22324e+06
440	32300000	25600000	22300000	26700000	2940000		7.40826e+06	5.87156e+06	5.11468e+06	6.12385e+06	6.1315e+06
441	31800000	25000000	22200000	26300000	2860000		7.29358e+06	5.73394e+06	5.09174e+06	6.03211e+06	6.03976e+06
442	31300000	24400000	22000000	25900000	2780000		7.1789e+06	5.59633e+06	5.04587e+06	5.94037e+06	5.94037e+06
443	30800000	23900000	21800000	25500000	2710000		7.06422e+06	5.48165e+06	5000000	5.84862e+06	5.84862e+06
444	30300000	23400000	21600000	25100000	2640000		6.94954e+06	5.36697e+06	4.95413e+06	5.75688e+06	5.75688e+06
445	29800000	22900000	21500000	24700000	2570000		6.83486e+06	5.25229e+06	4.93119e+06	5.66514e+06	5.67278e+06
446	29300000	22400000	21300000	24300000	2500000		6.72018e+06	5.13761e+06	4.88532e+06	5.57339e+06	5.58104e+06
447	28800000	22000000	21100000	24000000	2440000		6.6055e+06	5.04587e+06	4.83945e+06	5.50459e+06	5.49694e+06
448	28300000	21500000	20900000	23600000	2370000		6.49083e+06	4.93119e+06	4.79358e+06	5.41284e+06	5.4052e+06
449	27800000	21100000	20800000	23200000	2310000		6.37615e+06	4.83945e+06	4.77064e+06	5.3211e+06	5.32875e+06
450	27400000	20700000	20600000	22900000	2250000		6.2844e+06	4.74771e+06	4.72477e+06	5.25229e+06	5.25229e+06
451	26900000	20300000	20400000	22500000	2190000		6.16972e+06	4.65596e+06	4.6789e+06	5.16055e+06	5.1682e+06
452	26400000	19900000	20200000	22200000	2130000		6.05505e+06	4.56422e+06	4.63303e+06	5.09174e+06	5.0841e+06
453	26000000	19500000	20000000	21800000	2080000		5.9633e+06	4.47248e+06	4.58716e+06	5000000	5.00765e+06
454	25500000	19200000	19800000	21500000	2020000		5.84862e+06	4.40367e+06	4.54128e+06	4.93119e+06	4.93119e+06
455	25100000	18900000	19600000	21200000	1960000		5.75688e+06	4.33486e+06	4.49541e+06	4.86239e+06	4.86239e+06
456	24700000	18500000	19400000	20900000	1910000		5.66514e+06	4.24312e+06	4.44954e+06	4.79358e+06	4.78593e+06
457	24200000	18300000	19200000	20600000	1850000		5.55046e+06	4.19725e+06	4.40367e+06	4.72477e+06	4.71713e+06
458	23800000	18000000	19000000	20300000	1800000		5.45872e+06	4.12844e+06	4.3578e+06	4.65596e+06	4.64832e+06
459	23400000	17700000	18800000	20000000	1750000		5.36697e+06	4.05963e+06	4.31193e+06	4.58716e+06	4.57951e+06
460	23000000	17500000	18600000	19700000	1690000		5.27523e+06	4.01376e+06	4.26606e+06	4.51835e+06	4.51835e+06
461	22600000	17200000	18400000	19400000	1640000		5.18349e+06	3.94495e+06	4.22018e+06	4.44954e+06	4.44954e+06
462	22200000	17000000	18200000	19100000	1580000		5.09174e+06	3.89908e+06	4.17431e+06	4.38073e+06	4.38838e+06
463	21800000	16800000	17900000	18900000	1530000		5000000	3.85321e+06	4.1055e+06	4.33486e+06	4.31957e+06
464	21500000	16600000	17700000	18600000	1480000		4.93119e+06	3.80734e+06	4.05963e+06	4.26606e+06	4.26606e+06
465	21100000	16400000	17500000	18300000	1420000		4.83945e+06	3.76147e+06	4.01376e+06	4.19725e+06	4.20489e+06
466	20800000	16200000	17300000	18100000	1370000		4.77064e+06	3.7156e+06	3.96789e+06	4.15138e+06	4.15138e+06
467	20400000	16100000	17100000	17900000	1320000		4.6789e+06	3.69266e+06	3.92202e+06	4.1055e+06	4.09786e+06
468	20100000	15900000	16800000	17600000	1270000		4.61009e+06	3.64679e+06	3.85321e+06	4.0367e+06	4.0367e+06
469	19800000	15800000	16600000	17400000	1220000		4.54128e+06	3.62385e+06	3.80734e+06	3.99083e+06	3.99083e+06
470	19500000	15700000	16400000	17200000	1170000		4.47248e+06	3.60092e+06	3.76147e+06	3.94495e+06	3.94495e+06
471	19200000	15600000	16200000	17000000	1120000		4.40367e+06	3.57798e+06	3.7156e+06	3.89908e+06	3.89908e+06
472	18900000	15500000	15900000	16800000	1070000		4.33486e+06	3.55505e+06	3.64679e+06	3.85321e+06	3.84557e+06
473	18600000	15400000	15700000	16600000	1030000		4.26606e+06	3.53211e+06	3.60092e+06	3.80734e+06	3.79969e+06
474	18300000	15300000	15500000	16400000	984000		4.19725e+06	3.50917e+06	3.55505e+06	3.76147e+06	3.75382e+06
475	18100000	15200000	15200000	16200000	945000		4.15138e+06	3.48624e+06	3.48624e+06	3.7156e+06	3.70795e+06
476	17800000	15100000	15000000	16000000	909000		4.08257e+06	3.4633e+06	3.44037e+06	3.66972e+06	3.66208e+06
477	17500000	15000000	14800000	15800000	878000		4.01376e+06	3.44037e+06	3.3945e+06	3.62385e+06	3.61621e+06
478	17300000	15000000	14600000	15600000	851000		3.96789e+06	3.44037e+06	3.34862e+06	3.57798e+06	3.58563e+06
479	17100000	14900000	14300000	15400000	829000		3.92202e+06	3.41743e+06	3.27982e+06	3.53211e+06	3.53976e+06
480	16800000	14900000	14100000	15300000	813000		3.85321e+06	3.41743e+06	3.23394e+06	3.50917e+06	3.50153e+06
481	16600000	14800000	13900000	15100000	802000		3.80734e+06	3.3945e+06	3.18807e+06	3.4633e+06	3.4633e+06
482	16400000	14800000	13700000	15000000	797000		3.76147e+06	3.3945e+06	3.1422e+06	3.44037e+06	3.43272e+06
483	16200000	14800000	13500000	14800000	798000		3.7156e+06	3.3945e+06	3.09633e+06	3.3945e+06	3.40214e+06
484	16000000	14700000	13200000	14700000	804000		3.66972e+06	3.37156e+06	3.02752e+06	3.37156e+06	3.35627e+06
485	15800000	14700000	13000000	14500000	816000		3.62385e+06	3.37156e+06	2.98165e+06	3.32569e+06	3.32569e+06
486	15700000	14700000	12800000	14400000	832000		3.60092e+06	3.37156e+06	2.93578e+06	3.30275e+06	3.30275e+06
487	15500000	14600000	12600000	14200000	852000		3.55505e+06	3.34862e+06	2.88991e+06	3.25688e+06	3.26453e+06
488	15300000	14600000	12400000	14100000	876000		3.50917e+06	3.34862e+06	2.84404e+06	3.23394e+06	3.23394e+06
489	15200000	14600000	12200000	14000000	903000		3.48624e+06	3.34862e+06	2.79817e+06	3.21101e+06	3.21101e+06
490	15000000	14500000	12000000	13800000	932000		3.44037e+06	3.32569e+06	2.75229e+06	3.16514e+06	3.17278e+06
491	14800000	14500000	11800000	13700000	963000		3.3945e+06	3.32569e+06	2.70642e+06	3.1422e+06	3.1422e+06
492	14700000	14500000	11600000	13600000	995000		3.37156e+06	3.32569e+06	2.66055e+06	3.11927e+06	3.11927e+06
493	14600000	14500000	11400000	13500000	1030000		3.34862e+06	3.32569e+06	2.61468e+06	3.09633e+06	3.09633e+06
494	14400000	14400000	11200000	13400000	1060000		3.30275e+06	3.30275e+06	2.56881e+06	3.07339e+06	3.0581e+06
495	14300000	14400000	11100000	13300000	1100000		3.27982e+06	3.30275e+06	2.54587e+06	3.05046e+06	3.04281e+06
496	14200000	14400000	10900000	13100000	1130000		3.25688e+06	3.30275e+06	2500000	3.00459e+06	3.01988e+06
497	14000000	14300000	10700000	13000000	1160000		3.21101e+06	3.27982e+06	2.45413e+06	2.98165e+06	2.98165e+06
498	13900000	14300000	10500000	12900000	1190000		3.18807e+06	3.27982e+06	2.40826e+06	2.95872e+06	2.95872e+06
499	13800000	14300000	10400000	12800000	1220000		3.16514e+06	3.27982e+06	2.38532e+06	2.93578e+06	2.94343e+06
500	13700000	14200000	10200000	12700000	1250000		3.1422e+06	3.25688e+06	2.33945e+06	2.91284e+06	2.91284e+06
501	13600000	14200000	10100000	12600000	1280000		3.11927e+06	3.25688e+06	2.31651e+06	2.88991e+06	2.89755e+06
502	13500000	14100000	9920000	12500000	1310000		3.09633e+06	3.23394e+06	2.27523e+06	2.86697e+06	2.8685e+06
503	13400000	14100000	9770000	12400000	1340000		3.07339e+06	3.23394e+06	2.24083e+06	2.84404e+06	2.84939e+06
504	13300000	14000000	9630000	12300000	1360000		3.05046e+06	3.21101e+06	2.20872e+06	2.8211e+06	2.82339e+06
505	13200000	14000000	9500000	12200000	1380000		3.02752e+06	3.21101e+06	2.1789e+06	2.79817e+06	2.80581e+06
506	13100000	13900000	9360000	12100000	1400000		3.00459e+06	3.18807e+06	2.14679e+06	2.77523e+06	2.77982e+06
507	13000000	13800000	9240000	12000000	1420000		2.98165e+06	3.16514e+06	2.11927e+06	2.75229e+06	2.75535e+06
508	12900000	13800000	9110000	11900000	1440000		2.95872e+06	3.16514e+06	2.08945e+06	2.72936e+06	2.73777e+06
509	12900000	13700000	8990000	11900000	1450000		2.95872e+06	3.1422e+06	2.06193e+06	2.72936e+06	2.72095e+06
510	12800000	13600000	8880000	11800000	1460000		2.93578e+06	3.11927e+06	2.0367e+06	2.70642e+06	2.69725e+06
511	12700000	13600000	8770000	11700000	1470000		2.91284e+06	3.11927e+06	2.01147e+06	2.68349e+06	2.68119e+06
512	12600000	13500000	8660000	11600000	1480000		2.88991e+06	3.09633e+06	1.98624e+06	2.66055e+06	2.65749e+06
513	12500000	13400000	8560000	11500000	1490000		2.86697e+06	3.07339e+06	1.9633e+06	2.63761e+06	2.63456e+06
514	12500000	13300000	8460000	11400000	1500000		2.86697e+06	3.05046e+06	1.94037e+06	2.61468e+06	2.61927e+06
515	12400000	13200000	8370000	11300000	1500000		2.84404e+06	3.02752e+06	1.91972e+06	2.59174e+06	2.59709e+06
516	12300000	13100000	8280000	11200000	1500000		2.8211e+06	3.00459e+06	1.89908e+06	2.56881e+06	2.57492e+06
517	12300000	13000000	8190000	11200000	1500000		2.8211e+06	2.98165e+06	1.87844e+06	2.56881e+06	2.5604e+06
518	12200000	12900000	8110000	11100000	1500000		2.79817e+06	2.95872e+06	1.86009e+06	2.54587e+06	2.53899e+06
519	12100000	12800000	8030000	11000000	1490000		2.77523e+06	2.93578e+06	1.84174e+06	2.52294e+06	2.51758e+06
520	12100000	12700000	7960000	10900000	1490000		2.77523e+06	2.91284e+06	1.82569e+06	2500000	2.50459e+06
521	12000000	12600000	7890000	10800000	1480000		2.75229e+06	2.88991e+06	1.80963e+06	2.47706e+06	2.48394e+06
522	11900000	12500000	7820000	10800000	1470000		2.72936e+06	2.86697e+06	1.79358e+06	2.47706e+06	2.4633e+06
523	11900000	12400000	7760000	10700000	1470000		2.72936e+06	2.84404e+06	1.77982e+06	2.45413e+06	2.45107e+06
524	11800000	12300000	7700000	10600000	1450000		2.70642e+06	2.8211e+06	1.76606e+06	2.43119e+06	2.43119e+06
525	11800000	12200000	7640000	10500000	1440000		2.70642e+06	2.79817e+06	1.75229e+06	2.40826e+06	2.41896e+06
526	11700000	12000000	7590000	10400000	1430000		2.68349e+06	2.75229e+06	1.74083e+06	2.38532e+06	2.3922e+06
527	11700000	11900000	7540000	10400000	1420000		2.68349e+06	2.72936e+06	1.72936e+06	2.38532e+06	2.38073e+06
528	11600000	11800000	7490000	10300000	1400000		2.66055e+06	2.70642e+06	1.71789e+06	2.36239e+06	2.36162e+06
529	11600000	11700000	7450000	10200000	1390000		2.66055e+06	2.68349e+06	1.70872e+06	2.33945e+06	2.35092e+06
530	11500000	11500000	7410000	10100000	1370000		2.63761e+06	2.63761e+06	1.69954e+06	2.31651e+06	2.32492e+06
531	11400000	11400000	7370000	10100000	1350000		2.61468e+06	2.61468e+06	1.69037e+06	2.31651e+06	2.30657e+06
532	11400000	11300000	7330000	10000000	1340000		2.61468e+06	2.59174e+06	1.68119e+06	2.29358e+06	2.29587e+06
533	11300000	11200000	7300000	9930000	1320000		2.59174e+06	2.56881e+06	1.67431e+06	2.27752e+06	2.27829e+06
534	11300000	11000000	7270000	9870000	1300000		2.59174e+06	2.52294e+06	1.66743e+06	2.26376e+06	2.2607e+06
535	11300000	10900000	7240000	9800000	1280000		2.59174e+06	2500000	1.66055e+06	2.24771e+06	2.25076e+06
536	11200000	10800000	7220000	9730000	1260000		2.56881e+06	2.47706e+06	1.65596e+06	2.23165e+06	2.23394e+06
537	11200000	10600000	7200000	9670000	1240000		2.56881e+06	2.43119e+06	1.65138e+06	2.21789e+06	2.21713e+06
538	11100000	10500000	7180000	9600000	1220000		2.54587e+06	2.40826e+06	1.64679e+06	2.20183e+06	2.20031e+06
539	11100000	10400000	7160000	9540000	1200000		2.54587e+06	2.38532e+06	1.6422e+06	2.18807e+06	2.19113e+06
540	11000000	10300000	7150000	9480000	1190000		2.52294e+06	2.36239e+06	1.63991e+06	2.17431e+06	2.17508e+06
541	11000000	10100000	7130000	9420000	1170000		2.52294e+06	2.31651e+06	1.63532e+06	2.16055e+06	2.15826e+06
542	10900000	10000000	7120000	9360000	1150000		2500000	2.29358e+06	1.63303e+06	2.14679e+06	2.1422e+06
543	10900000	9890000	7110000	9300000	1130000		2500000	2.26835e+06	1.63073e+06	2.13303e+06	2.13303e+06
544	10800000	9770000	7110000	9240000	1110000		2.47706e+06	2.24083e+06	1.63073e+06	2.11927e+06	2.11621e+06
545	10800000	9650000	7100000	9190000	1090000		2.47706e+06	2.2133e+06	1.62844e+06	2.1078e+06	2.10627e+06
546	10800000	9530000	7100000	9130000	1080000		2.47706e+06	2.18578e+06	1.62844e+06	2.09404e+06	2.09709e+06
547	10700000	9410000	7100000	9080000	1060000		2.45413e+06	2.15826e+06	1.62844e+06	2.08257e+06	2.08028e+06
548	10700000	9290000	7100000	9030000	1040000		2.45413e+06	2.13073e+06	1.62844e+06	2.0711e+06	2.0711e+06
549	10600000	9180000	7100000	8980000	1030000		2.43119e+06	2.1055e+06	1.62844e+06	2.05963e+06	2.05505e+06
550	10600000	9070000	7110000	8930000	1010000		2.43119e+06	2.08028e+06	1.63073e+06	2.04817e+06	2.0474e+06
551	10600000	8960000	7120000	8880000	997000		2.43119e+06	2.05505e+06	1.63303e+06	2.0367e+06	2.03976e+06
552	10500000	8850000	7120000	8840000	983000		2.40826e+06	2.02982e+06	1.63303e+06	2.02752e+06	2.0237e+06
553	10500000	8750000	7130000	8790000	970000		2.40826e+06	2.00688e+06	1.63532e+06	2.01606e+06	2.01682e+06
554	10500000	8640000	7140000	8750000	957000		2.40826e+06	1.98165e+06	1.63761e+06	2.00688e+06	2.00917e+06
555	10400000	8540000	7160000	8710000	944000		2.38532e+06	1.95872e+06	1.6422e+06	1.99771e+06	1.99541e+06
556	10400000	8450000	7170000	8660000	933000		2.38532e+06	1.93807e+06	1.6445e+06	1.98624e+06	1.9893e+06
557	10300000	8350000	7180000	8630000	922000		2.36239e+06	1.91514e+06	1.64679e+06	1.97936e+06	1.97477e+06
558	10300000	8260000	7200000	8590000	911000		2.36239e+06	1.8945e+06	1.65138e+06	1.97018e+06	1.96942e+06
559	10300000	8170000	7220000	8550000	901000		2.36239e+06	1.87385e+06	1.65596e+06	1.96101e+06	1.96407e+06
560	10200000	8080000	7240000	8520000	892000		2.33945e+06	1.85321e+06	1.66055e+06	1.95413e+06	1.95107e+06
561	10200000	7990000	7250000	8480000	883000		2.33945e+06	1.83257e+06	1.66284e+06	1.94495e+06	1.94495e+06
562	10200000	7910000	7270000	8450000	875000		2.33945e+06	1.81422e+06	1.66743e+06	1.93807e+06	1.94037e+06
563	10100000	7830000	7300000	8420000	867000		2.31651e+06	1.79587e+06	1.67431e+06	1.93119e+06	1.9289e+06
564	10100000	7760000	7320000	8390000	860000		2.31651e+06	1.77982e+06	1.6789e+06	1.92431e+06	1.92508e+06
565	10100000	7680000	7340000	8360000	853000		2.31651e+06	1.76147e+06	1.68349e+06	1.91743e+06	1.92049e+06
566	10000000	7610000	7360000	8330000	847000		2.29358e+06	1.74541e+06	1.68807e+06	1.91055e+06	1.90902e+06
567	9980000	7540000	7380000	8300000	841000		2.28899e+06	1.72936e+06	1.69266e+06	1.90367e+06	1.90367e+06
568	9950000	7470000	7410000	8280000	835000		2.28211e+06	1.7133e+06	1.69954e+06	1.89908e+06	1.89832e+06
569	9910000	7410000	7430000	8250000	830000		2.27294e+06	1.69954e+06	1.70413e+06	1.8922e+06	1.8922e+06
570	9880000	7350000	7460000	8230000	825000		2.26606e+06	1.68578e+06	1.71101e+06	1.88761e+06	1.88761e+06
571	9840000	7290000	7480000	8200000	820000		2.25688e+06	1.67202e+06	1.7156e+06	1.88073e+06	1.8815e+06
572	9800000	7240000	7500000	8180000	815000		2.24771e+06	1.66055e+06	1.72018e+06	1.87615e+06	1.87615e+06
573	9770000	7180000	7530000	8160000	811000		2.24083e+06	1.64679e+06	1.72706e+06	1.87156e+06	1.87156e+06
574	9730000	7130000	7550000	8140000	806000		2.23165e+06	1.63532e+06	1.73165e+06	1.86697e+06	1.86621e+06
575	9700000	7080000	7580000	8120000	802000		2.22477e+06	1.62385e+06	1.73853e+06	1.86239e+06	1.86239e+06
576	9660000	7040000	7600000	8100000	798000		2.2156e+06	1.61468e+06	1.74312e+06	1.8578e+06	1.8578e+06
577	9630000	6990000	7630000	8080000	794000		2.20872e+06	1.60321e+06	1.75e+06	1.85321e+06	1.85398e+06
578	9590000	6950000	7650000	8060000	790000		2.19954e+06	1.59404e+06	1.75459e+06	1.84862e+06	1.84939e+06
579	9550000	6910000	7670000	8050000	785000		2.19037e+06	1.58486e+06	1.75917e+06	1.84633e+06	1.8448e+06
580	9520000	6870000	7700000	8030000	781000		2.18349e+06	1.57569e+06	1.76606e+06	1.84174e+06	1.84174e+06
581	9480000	6840000	7720000	8010000	777000		2.17431e+06	1.56881e+06	1.77064e+06	1.83716e+06	1.83792e+06
582	9440000	6810000	7740000	8000000	772000		2.16514e+06	1.56193e+06	1.77523e+06	1.83486e+06	1.8341e+06
583	9410000	6770000	7760000	7980000	768000		2.15826e+06	1.55275e+06	1.77982e+06	1.83028e+06	1.83028e+06
584	9370000	6750000	7780000	7970000	763000		2.14908e+06	1.54817e+06	1.7844e+06	1.82798e+06	1.82722e+06
585	9330000	6720000	7800000	7950000	758000		2.13991e+06	1.54128e+06	1.78899e+06	1.82339e+06	1.82339e+06
586	9290000	6690000	7820000	7940000	753000		2.13073e+06	1.5344e+06	1.79358e+06	1.8211e+06	1.81957e+06
587	9260000	6670000	7840000	7920000	748000		2.12385e+06	1.52982e+06	1.79817e+06	1.81651e+06	1.81728e+06
588	9220000	6650000	7850000	7910000	743000		2.11468e+06	1.52523e+06	1.80046e+06	1.81422e+06	1.81346e+06
589	9180000	6630000	7870000	7890000	737000		2.1055e+06	1.52064e+06	1.80505e+06	1.80963e+06	1.8104e+06
590	9140000	6610000	7880000	7880000	731000		2.09633e+06	1.51606e+06	1.80734e+06	1.80734e+06	1.80657e+06
591	9100000	6590000	7900000	7860000	725000		2.08716e+06	1.51147e+06	1.81193e+06	1.80275e+06	1.80352e+06
592	9060000	6570000	7910000	7850000	719000		2.07798e+06	1.50688e+06	1.81422e+06	1.80046e+06	1.79969e+06
593	9020000	6560000	7920000	7830000	712000		2.06881e+06	1.50459e+06	1.81651e+06	1.79587e+06	1.79664e+06
594	8980000	6540000	7930000	7820000	705000		2.05963e+06	1500000	1.81881e+06	1.79358e+06	1.79281e+06
595	8940000	6530000	7940000	7800000	698000		2.05046e+06	1.49771e+06	1.8211e+06	1.78899e+06	1.78976e+06
596	8890000	6520000	7940000	7780000	690000		2.03899e+06	1.49541e+06	1.8211e+06	1.7844e+06	1.78517e+06
597	8850000	6510000	7950000	7770000	683000		2.02982e+06	1.49312e+06	1.82339e+06	1.78211e+06	1.78211e+06
598	8810000	6500000	7950000	7750000	675000		2.02064e+06	1.49083e+06	1.82339e+06	1.77752e+06	1.77829e+06
599	8770000	6490000	7950000	7740000	666000		2.01147e+06	1.48853e+06	1.82339e+06	1.77523e+06	1.77446e+06
600	8720000	6480000	7950000	7720000	658000		2e+06	1.48624e+06	1.82339e+06	1.77064e+06	1.76988e+06
601	8680000	6470000	7950000	7700000	649000		1.99083e+06	1.48394e+06	1.82339e+06	1.76606e+06	1.76606e+06
602	8640000	6470000	7950000	7680000	639000		1.98165e+06	1.48394e+06	1.82339e+06	1.76147e+06	1.763e+06
603	8590000	6460000	7940000	7670000	630000		1.97018e+06	1.48165e+06	1.8211e+06	1.75917e+06	1.75765e+06
604	8540000	6460000	7940000	7650000	620000		1.95872e+06	1.48165e+06	1.8211e+06	1.75459e+06	1.75382e+06
605	8500000	6450000	7930000	7630000	610000		1.94954e+06	1.47936e+06	1.81881e+06	1.75e+06	1.74924e+06
606	8450000	6450000	7920000	7610000	600000		1.93807e+06	1.47936e+06	1.81651e+06	1.74541e+06	1.74465e+06
607	8410000	6440000	7910000	7590000	589000		1.9289e+06	1.47706e+06	1.81422e+06	1.74083e+06	1.74006e+06
608	8360000	6440000	7900000	7570000	578000		1.91743e+06	1.47706e+06	1.81193e+06	1.73624e+06	1.73547e+06
609	8310000	6440000	7880000	7550000	567000		1.90596e+06	1.47706e+06	1.80734e+06	1.73165e+06	1.73012e+06
610	8270000	6440000	7870000	7520000	556000		1.89679e+06	1.47706e+06	1.80505e+06	1.72477e+06	1.7263e+06
611	8220000	6430000	7850000	7500000	544000		1.88532e+06	1.47477e+06	1.80046e+06	1.72018e+06	1.72018e+06
612	8170000	6430000	7830000	7480000	533000		1.87385e+06	1.47477e+06	1.79587e+06	1.7156e+06	1.71483e+06
613	8120000	6430000	7810000	7450000	521000		1.86239e+06	1.47477e+06	1.79128e+06	1.70872e+06	1.70948e+06
614	8080000	6430000	7780000	7430000	508000		1.85321e+06	1.47477e+06	1.7844e+06	1.70413e+06	1.70413e+06
615	8030000	6420000	7760000	7400000	496000		1.84174e+06	1.47248e+06	1.77982e+06	1.69725e+06	1.69801e+06
616	7980000	6420000	7730000	7380000	483000		1.83028e+06	1.47248e+06	1.77294e+06	1.69266e+06	1.6919e+06
617	7930000	6420000	7700000	7350000	470000		1.81881e+06	1.47248e+06	1.76606e+06	1.68578e+06	1.68578e+06
618	7880000	6420000	7670000	7320000	457000		1.80734e+06	1.47248e+06	1.75917e+06	1.6789e+06	1.67966e+06
619	7830000	6410000	7640000	7290000	444000		1.79587e+06	1.47018e+06	1.75229e+06	1.67202e+06	1.67278e+06
620	7780000	6410000	7610000	7270000	431000		1.7844e+06	1.47018e+06	1.74541e+06	1.66743e+06	1.66667e+06
621	7730000	6410000	7570000	7240000	418000		1.77294e+06	1.47018e+06	1.73624e+06	1.66055e+06	1.65979e+06
622	7680000	6400000	7540000	7210000	404000		1.76147e+06	1.46789e+06	1.72936e+06	1.65367e+06	1.65291e+06
623	7630000	6400000	7500000	7180000	391000		1.75e+06	1.46789e+06	1.72018e+06	1.64679e+06	1.64602e+06
624	7580000	6390000	7460000	7140000	377000		1.73853e+06	1.4656e+06	1.71101e+06	1.63761e+06	1.63838e+06
625	7530000	6390000	7420000	7110000	363000		1.72706e+06	1.4656e+06	1.70183e+06	1.63073e+06	1.6315e+06
626	7480000	6380000	7380000	7080000	349000		1.7156e+06	1.4633e+06	1.69266e+06	1.62385e+06	1.62385e+06
627	7420000	6380000	7340000	7050000	335000		1.70183e+06	1.4633e+06	1.68349e+06	1.61697e+06	1.61621e+06
628	7370000	6370000	7290000	7010000	321000		1.69037e+06	1.46101e+06	1.67202e+06	1.6078e+06	1.6078e+06
629	7320000	6360000	7250000	6980000	307000		1.6789e+06	1.45872e+06	1.66284e+06	1.60092e+06	1.60015e+06
630	7270000	6360000	7200000	6940000	293000		1.66743e+06	1.45872e+06	1.65138e+06	1.59174e+06	1.59251e+06
631	7220000	6350000	7150000	6910000	280000		1.65596e+06	1.45642e+06	1.63991e+06	1.58486e+06	1.5841e+06
632	7170000	6340000	7100000	6870000	266000		1.6445e+06	1.45413e+06	1.62844e+06	1.57569e+06	1.57569e+06
633	7120000	6330000	7050000	6830000	252000		1.63303e+06	1.45183e+06	1.61697e+06	1.56651e+06	1.56728e+06
634	7070000	6320000	7000000	6800000	238000		1.62156e+06	1.44954e+06	1.6055e+06	1.55963e+06	1.55887e+06
635	7010000	6310000	6950000	6760000	224000		1.6078e+06	1.44725e+06	1.59404e+06	1.55046e+06	1.54969e+06
636	6960000	6300000	6900000	6720000	211000		1.59633e+06	1.44495e+06	1.58257e+06	1.54128e+06	1.54128e+06
637	6910000	6290000	6850000	6680000	197000		1.58486e+06	1.44266e+06	1.5711e+06	1.53211e+06	1.53287e+06
638	6860000	6280000	6790000	6640000	184000		1.57339e+06	1.44037e+06	1.55734e+06	1.52294e+06	1.5237e+06
639	6810000	6270000	6740000	6600000	171000		1.56193e+06	1.43807e+06	1.54587e+06	1.51376e+06	1.51529e+06
640	6760000	6250000	6680000	6560000	158000		1.55046e+06	1.43349e+06	1.53211e+06	1.50459e+06	1.50535e+06
641	6710000	6240000	6620000	6520000	145000		1.53899e+06	1.43119e+06	1.51835e+06	1.49541e+06	1.49618e+06
642	6660000	6220000	6570000	6480000	132000		1.52752e+06	1.42661e+06	1.50688e+06	1.48624e+06	1.487e+06
643	6610000	6210000	6510000	6440000	120000		1.51606e+06	1.42431e+06	1.49312e+06	1.47706e+06	1.47783e+06
644	6560000	6190000	6450000	6400000	109000		1.50459e+06	1.41972e+06	1.47936e+06	1.46789e+06	1.46789e+06
645	6510000	6180000	6390000	6360000	97400		1.49312e+06	1.41743e+06	1.4656e+06	1.45872e+06	1.45872e+06
646	6460000	6160000	6330000	6320000	86900		1.48165e+06	1.41284e+06	1.45183e+06	1.44954e+06	1.44878e+06
647	6410000	6140000	6270000	6280000	77400		1.47018e+06	1.40826e+06	1.43807e+06	1.44037e+06	1.43884e+06
648	6360000	6120000	6210000	6230000	69200		1.45872e+06	1.40367e+06	1.42431e+06	1.4289e+06	1.4289e+06
649	6310000	6110000	6150000	6190000	62600		1.44725e+06	1.40138e+06	1.41055e+06	1.41972e+06	1.41972e+06
650	6260000	6090000	6090000	6150000	58200		1.43578e+06	1.39679e+06	1.39679e+06	1.41055e+06	1.40979e+06
651	6220000	6070000	6030000	6100000	56400		1.42661e+06	1.3922e+06	1.38303e+06	1.39908e+06	1.40061e+06
652	6170000	6050000	5970000	6060000	57200		1.41514e+06	1.38761e+06	1.36927e+06	1.38991e+06	1.39067e+06
653	6120000	6020000	5910000	6020000	60600		1.40367e+06	1.38073e+06	1.3555e+06	1.38073e+06	1.37997e+06
654	6070000	6000000	5850000	5970000	66000		1.3922e+06	1.37615e+06	1.34174e+06	1.36927e+06	1.37003e+06
655	6030000	5980000	5790000	5930000	72900		1.38303e+06	1.37156e+06	1.32798e+06	1.36009e+06	1.36086e+06
656	5980000	5960000	5730000	5890000	80900		1.37156e+06	1.36697e+06	1.31422e+06	1.35092e+06	1.35092e+06
657	5930000	5930000	5660000	5840000	89500		1.36009e+06	1.36009e+06	1.29817e+06	1.33945e+06	1.33945e+06
658	5890000	5910000	5600000	5800000	98600		1.35092e+06	1.3555e+06	1.2844e+06	1.33028e+06	1.33028e+06
659	5840000	5890000	5540000	5760000	108000		1.33945e+06	1.35092e+06	1.27064e+06	1.3211e+06	1.32034e+06
660	5790000	5860000	5480000	5710000	118000		1.32798e+06	1.34404e+06	1.25688e+06	1.30963e+06	1.30963e+06
661	5750000	5840000	5420000	5670000	127000		1.31881e+06	1.33945e+06	1.24312e+06	1.30046e+06	1.30046e+06
662	5700000	5810000	5360000	5630000	137000		1.30734e+06	1.33257e+06	1.22936e+06	1.29128e+06	1.28976e+06
663	5660000	5790000	5300000	5580000	147000		1.29817e+06	1.32798e+06	1.2156e+06	1.27982e+06	1.28058e+06
664	5620000	5760000	5240000	5540000	156000		1.28899e+06	1.3211e+06	1.20183e+06	1.27064e+06	1.27064e+06
665	5570000	5740000	5180000	5500000	166000		1.27752e+06	1.31651e+06	1.18807e+06	1.26147e+06	1.2607e+06
666	5530000	5710000	5120000	5450000	176000		1.26835e+06	1.30963e+06	1.17431e+06	1250000	1.25076e+06
667	5490000	5680000	5060000	5410000	185000		1.25917e+06	1.30275e+06	1.16055e+06	1.24083e+06	1.24083e+06
668	5440000	5660000	5000000	5370000	194000		1.24771e+06	1.29817e+06	1.14679e+06	1.23165e+06	1.23089e+06
669	5400000	5630000	4940000	5320000	204000		1.23853e+06	1.29128e+06	1.13303e+06	1.22018e+06	1.22095e+06
670	5360000	5600000	4880000	5280000	213000		1.22936e+06	1.2844e+06	1.11927e+06	1.21101e+06	1.21101e+06
671	5320000	5580000	4820000	5240000	222000		1.22018e+06	1.27982e+06	1.1055e+06	1.20183e+06	1.20183e+06
672	5280000	5550000	4760000	5200000	231000		1.21101e+06	1.27294e+06	1.09174e+06	1.19266e+06	1.1919e+06
673	5240000	5520000	4710000	5150000	239000		1.20183e+06	1.26606e+06	1.08028e+06	1.18119e+06	1.18272e+06
674	5200000	5500000	4650000	5110000	248000		1.19266e+06	1.26147e+06	1.06651e+06	1.17202e+06	1.17355e+06
675	5160000	5470000	4590000	5070000	257000		1.18349e+06	1.25459e+06	1.05275e+06	1.16284e+06	1.16361e+06
676	5120000	5440000	4530000	5030000	265000		1.17431e+06	1.24771e+06	1.03899e+06	1.15367e+06	1.15367e+06
677	5080000	5410000	4480000	4990000	273000		1.16514e+06	1.24083e+06	1.02752e+06	1.1445e+06	1.1445e+06
678	5040000	5390000	4420000	4950000	281000		1.15596e+06	1.23624e+06	1.01376e+06	1.13532e+06	1.13532e+06
679	5000000	5360000	4370000	4910000	290000		1.14679e+06	1.22936e+06	1.00229e+06	1.12615e+06	1.12615e+06
680	4960000	5330000	4310000	4870000	298000		1.13761e+06	1.22248e+06	988532	1.11697e+06	1.11621e+06
681	4920000	5300000	4260000	4830000	305000		1.12844e+06	1.2156e+06	977064	1.1078e+06	1.10703e+06
682	4890000	5280000	4210000	4790000	313000		1.12156e+06	1.21101e+06	965596	1.09862e+06	1.09939e+06
683	4850000	5250000	4150000	4750000	321000		1.11239e+06	1.20413e+06	951835	1.08945e+06	1.08945e+06
684	4810000	5220000	4100000	4710000	328000		1.10321e+06	1.19725e+06	940367	1.08028e+06	1.08028e+06
685	4780000	5200000	4050000	4670000	336000		1.09633e+06	1.19266e+06	928899	1.0711e+06	1.07263e+06
686	4740000	5170000	4000000	4640000	343000		1.08716e+06	1.18578e+06	917431	1.06422e+06	1.06346e+06
687	4710000	5140000	3940000	4600000	350000		1.08028e+06	1.1789e+06	903670	1.05505e+06	1.05428e+06
688	4670000	5120000	3890000	4560000	357000		1.0711e+06	1.17431e+06	892202	1.04587e+06	1.04587e+06
689	4640000	5090000	3840000	4520000	364000		1.06422e+06	1.16743e+06	880734	1.0367e+06	1.03746e+06
690	4600000	5070000	3790000	4490000	371000		1.05505e+06	1.16284e+06	869266	1.02982e+06	1.02905e+06
691	4570000	5040000	3750000	4450000	378000		1.04817e+06	1.15596e+06	860092	1.02064e+06	1.02141e+06
692	4530000	5010000	3700000	4420000	385000		1.03899e+06	1.14908e+06	848624	1.01376e+06	1.01223e+06
693	4500000	4990000	3650000	4380000	391000		1.03211e+06	1.1445e+06	837156	1.00459e+06	1.00459e+06
694	4470000	4960000	3600000	4340000	398000		1.02523e+06	1.13761e+06	825688	995413	996177
695	4440000	4940000	3560000	4310000	404000		1.01835e+06	1.13303e+06	816514	988532	989297
696	4400000	4910000	3510000	4280000	410000		1.00917e+06	1.12615e+06	805046	981651	980122
697	4370000	4890000	3460000	4240000	417000		1.00229e+06	1.12156e+06	793578	972477	972477
698	4340000	4870000	3420000	4210000	423000		995413	1.11697e+06	784404	965596	965596
699	4310000	4840000	3370000	4180000	429000		988532	1.11009e+06	772936	958716	957187
700	4280000	4820000	3330000	4140000	435000		981651	1.1055e+06	763761	949541	950306
701	4250000	4790000	3290000	4110000	441000		974771	1.09862e+06	754587	942661	942661
702	4220000	4770000	3240000	4080000	446000		967890	1.09404e+06	743119	935780	935015
703	4190000	4750000	3200000	4050000	452000		961009	1.08945e+06	733945	928899	928135
704	4160000	4730000	3160000	4020000	457000		954128	1.08486e+06	724771	922018	921254
705	4130000	4700000	3120000	3980000	463000		947248	1.07798e+06	715596	912844	913609
706	4100000	4680000	3080000	3950000	468000		940367	1.07339e+06	706422	905963	906728
707	4070000	4660000	3040000	3920000	473000		933486	1.06881e+06	697248	899083	899847
708	4050000	4640000	3000000	3890000	479000		928899	1.06422e+06	688073	892202	893731
709	4020000	4610000	2960000	3860000	484000		922018	1.05734e+06	678899	885321	886086
710	3990000	4590000	2920000	3840000	489000		915138	1.05275e+06	669725	880734	879205
711	3960000	4570000	2880000	3810000	493000		908257	1.04817e+06	660550	873853	872324
712	3940000	4550000	2850000	3780000	498000		903670	1.04358e+06	653670	866972	866972
713	3910000	4530000	2810000	3750000	503000		896789	1.03899e+06	644495	860092	860092
714	3880000	4510000	2770000	3720000	507000		889908	1.0344e+06	635321	853211	853211
715	3860000	4490000	2740000	3690000	511000		885321	1.02982e+06	628440	846330	847859
716	3830000	4470000	2700000	3670000	516000		878440	1.02523e+06	619266	841743	840979
717	3810000	4450000	2670000	3640000	520000		873853	1.02064e+06	612385	834862	835627
718	3780000	4430000	2630000	3610000	524000		866972	1.01606e+06	603211	827982	828746
719	3760000	4400000	2600000	3590000	528000		862385	1.00917e+06	596330	823394	822630
720	3730000	4380000	2570000	3560000	532000		855505	1.00459e+06	589450	816514	816514
721	3710000	4360000	2530000	3540000	535000		850917	1e+06	580275	811927	810398
722	3680000	4340000	2500000	3510000	539000		844037	995413	573394	805046	804281
723	3660000	4320000	2470000	3490000	542000		839450	990826	566514	800459	798930
724	3640000	4300000	2440000	3460000	545000		834862	986239	559633	793578	793578
725	3610000	4280000	2410000	3440000	549000		827982	981651	552752	788991	787462
726	3590000	4260000	2380000	3410000	552000		823394	977064	545872	782110	782110
727	3570000	4240000	2350000	3390000	554000		818807	972477	538991	777523	776758
728	3550000	4220000	2320000	3360000	557000		814220	967890	532110	770642	771407
729	3520000	4200000	2290000	3340000	560000		807339	963303	525229	766055	765291
730	3500000	4180000	2260000	3320000	562000		802752	958716	518349	761468	759939
731	3480000	4160000	2230000	3290000	565000		798165	954128	511468	754587	754587
732	3460000	4140000	2210000	3270000	567000		793578	949541	506881	750000	750000
733	3440000	4120000	2180000	3250000	569000		788991	944954	500000	745413	744648
734	3410000	4100000	2150000	3220000	571000		782110	940367	493119	738532	738532
735	3390000	4080000	2130000	3200000	572000		777523	935780	488532	733945	733945
736	3370000	4060000	2100000	3180000	574000		772936	931193	481651	729358	728593
737	3350000	4040000	2080000	3160000	575000		768349	926606	477064	724771	724006
738	3330000	4020000	2050000	3130000	577000		763761	922018	470183	717890	718654
739	3310000	4000000	2030000	3110000	578000		759174	917431	465596	713303	714067
740	3290000	3980000	2000000	3090000	579000		754587	912844	458716	708716	708716
741	3270000	3960000	1980000	3070000	580000		750000	908257	454128	704128	704128
742	3250000	3940000	1960000	3050000	580000		745413	903670	449541	699541	699541
743	3230000	3920000	1930000	3030000	581000		740826	899083	442661	694954	694190
744	3210000	3900000	1910000	3010000	581000		736239	894495	438073	690367	689602
745	3190000	3870000	1890000	2990000	582000		731651	887615	433486	685780	684251
746	3170000	3850000	1870000	2960000	582000		727064	883028	428899	678899	679664
747	3150000	3830000	1850000	2940000	582000		722477	878440	424312	674312	675076
748	3130000	3810000	1830000	2920000	582000		717890	873853	419725	669725	670489
749	3120000	3790000	1810000	2900000	581000		715596	869266	415138	665138	666667
750	3100000	3760000	1790000	2880000	581000		711009	862385	410550	660550	661315
751	3080000	3740000	1770000	2860000	580000		706422	857798	405963	655963	656728
752	3060000	3720000	1750000	2840000	579000		701835	853211	401376	651376	652141
753	3040000	3700000	1730000	2820000	578000		697248	848624	396789	646789	647554
754	3020000	3670000	1710000	2800000	577000		692661	841743	392202	642202	642202
755	3010000	3650000	1690000	2780000	576000		690367	837156	387615	637615	638379
756	2990000	3630000	1670000	2760000	574000		685780	832569	383028	633028	633792
757	2970000	3600000	1660000	2740000	573000		681193	825688	380734	628440	629205
758	2950000	3580000	1640000	2720000	571000		676606	821101	376147	623853	624618
759	2940000	3550000	1620000	2700000	569000		674312	814220	371560	619266	620031
760	2920000	3530000	1610000	2690000	567000		669725	809633	369266	616972	616208
761	2900000	3510000	1590000	2670000	565000		665138	805046	364679	612385	611621
762	2880000	3480000	1570000	2650000	563000		660550	798165	360092	607798	606269
763	2870000	3460000	1560000	2630000	561000		658257	793578	357798	603211	603211
764	2850000	3430000	1540000	2610000	558000		653670	786697	353211	598624	597859
765	2830000	3410000	1530000	2590000	556000		649083	782110	350917	594037	594037
766	2820000	3380000	1510000	2570000	553000		646789	775229	346330	589450	589450
767	2800000	3360000	1500000	2550000	550000		642202	770642	344037	584862	585627
768	2790000	3330000	1490000	2530000	547000		639908	763761	341743	580275	581804
769	2770000	3300000	1470000	2520000	544000		635321	756881	337156	577982	576453
770	2750000	3280000	1460000	2500000	541000		630734	752294	334862	573394	572630
771	2740000	3250000	1450000	2480000	537000		628440	745413	332569	568807	568807
772	2720000	3230000	1430000	2460000	534000		623853	740826	327982	564220	564220
773	2710000	3200000	1420000	2440000	530000		621560	733945	325688	559633	560398
774	2690000	3170000	1410000	2420000	527000		616972	727064	323394	555046	555810
775	2670000	3150000	1400000	2410000	523000		612385	722477	321101	552752	551988
776	2660000	3120000	1390000	2390000	519000		610092	715596	318807	548165	548165
777	2640000	3090000	1370000	2370000	515000		605505	708716	314220	543578	542813
778	2630000	3070000	1360000	2350000	511000		603211	704128	311927	538991	539755
779	2610000	3040000	1350000	2330000	507000		598624	697248	309633	534404	535168
780	2600000	3010000	1340000	2320000	502000		596330	690367	307339	532110	531346
781	2580000	2990000	1330000	2300000	498000		591743	685780	305046	527523	527523
782	2570000	2960000	1320000	2280000	494000		589450	678899	302752	522936	523700
783	2550000	2930000	1310000	2260000	489000		584862	672018	300459	518349	519113
784	2540000	2900000	1300000	2250000	484000		582569	665138	298165	516055	515291
785	2520000	2880000	1290000	2230000	480000		577982	660550	295872	511468	511468
786	2510000	2850000	1280000	2210000	475000		575688	653670	293578	506881	507645
787	2490000	2820000	1280000	2200000	470000		571101	646789	293578	504587	503823
788	2480000	2790000	1270000	2180000	465000		568807	639908	291284	500000	500000
789	2460000	2770000	1260000	2160000	460000		564220	635321	288991	495413	496177
790	2450000	2740000	1250000	2150000	455000		561927	628440	286697	493119	492355
791	2430000	2710000	1240000	2130000	450000		557339	621560	284404	488532	487768
792	2420000	2680000	1240000	2110000	445000		555046	614679	284404	483945	484709
793	2410000	2660000	1230000	2100000	440000		552752	610092	282110	481651	481651
794	2390000	2630000	1220000	2080000	434000		548165	603211	279817	477064	477064
795	2380000	2600000	1220000	2060000	429000		545872	596330	279817	472477	474006
796	2360000	2570000	1210000	2050000	424000		541284	589450	277523	470183	469419
797	2350000	2540000	1200000	2030000	418000		538991	582569	275229	465596	465596
798	2330000	2520000	1200000	2020000	413000		534404	577982	275229	463303	462538
799	2320000	2490000	1190000	2000000	407000		532110	571101	272936	458716	458716
800	2310000	2460000	1190000	1980000	402000		529817	564220	272936	454128	455657
801	2290000	2430000	1180000	1970000	396000		525229	557339	270642	451835	451070
802	2280000	2410000	1170000	1950000	391000		522936	552752	268349	447248	448012
803	2260000	2380000	1170000	1940000	385000		518349	545872	268349	444954	444190
804	2250000	2350000	1170000	1920000	380000		516055	538991	268349	440367	441131
805	2230000	2330000	1160000	1910000	374000		511468	534404	266055	438073	437309
806	2220000	2300000	1160000	1890000	368000		509174	527523	266055	433486	434251
807	2210000	2270000	1150000	1880000	363000		506881	520642	263761	431193	430428
808	2190000	2250000	1150000	1860000	357000		502294	516055	263761	426606	427370
809	2180000	2220000	1150000	1850000	351000		500000	509174	263761	424312	424312
810	2160000	2190000	1140000	1830000	346000		495413	502294	261468	419725	419725
811	2150000	2170000	1140000	1820000	340000		493119	497706	261468	417431	417431
812	2130000	2140000	1140000	1800000	334000		488532	490826	261468	412844	413609
813	2120000	2120000	1130000	1790000	329000		486239	486239	259174	410550	410550
814	2110000	2090000	1130000	1780000	323000		483945	479358	259174	408257	407492
815	2090000	2070000	1130000	1760000	317000		479358	474771	259174	403670	404434
816	2080000	2040000	1120000	1750000	312000		477064	467890	256881	401376	400612
817	2060000	2020000	1120000	1730000	306000		472477	463303	256881	396789	397554
818	2050000	1990000	1120000	1720000	300000		470183	456422	256881	394495	394495
819	2040000	1970000	1120000	1710000	295000		467890	451835	256881	392202	392202
820	2020000	1940000	1120000	1690000	289000		463303	444954	256881	387615	388379
821	2010000	1920000	1120000	1680000	283000		461009	440367	256881	385321	386086
822	1990000	1890000	1110000	1670000	278000		456422	433486	254587	383028	381498
823	1980000	1870000	1110000	1650000	272000		454128	428899	254587	378440	379205
824	1960000	1850000	1110000	1640000	267000		449541	424312	254587	376147	376147
825	1950000	1820000	1110000	1630000	261000		447248	417431	254587	373853	373089
826	1940000	1800000	1110000	1620000	256000		444954	412844	254587	371560	370795
827	1920000	1780000	1110000	1600000	250000		440367	408257	254587	366972	367737
828	1910000	1760000	1110000	1590000	245000		438073	403670	254587	364679	365443
829	1890000	1730000	1110000	1580000	239000		433486	396789	254587	362385	361621
830	1880000	1710000	1110000	1570000	234000		431193	392202	254587	360092	359327
831	1870000	1690000	1110000	1550000	229000		428899	387615	254587	355505	357034
832	1850000	1670000	1110000	1540000	223000		424312	383028	254587	353211	353976
833	1840000	1650000	1110000	1530000	218000		422018	378440	254587	350917	351682
834	1820000	1630000	1110000	1520000	213000		417431	373853	254587	348624	348624
835	1810000	1610000	1110000	1510000	208000		415138	369266	254587	346330	346330
836	1790000	1590000	1110000	1500000	202000		410550	364679	254587	344037	343272
837	1780000	1570000	1110000	1490000	197000		408257	360092	254587	341743	340979
838	1770000	1550000	1110000	1480000	192000		405963	355505	254587	339450	338685
839	1750000	1530000	1110000	1460000	187000		401376	350917	254587	334862	335627
840	1740000	1510000	1110000	1450000	182000		399083	346330	254587	332569	333333
841	1720000	1490000	1110000	1440000	177000		394495	341743	254587	330275	330275
842	1710000	1470000	1120000	1430000	173000		392202	337156	256881	327982	328746
843	1700000	1460000	1120000	1420000	168000		389908	334862	256881	325688	327217
844	1680000	1440000	1120000	1410000	163000		385321	330275	256881	323394	324159
845	1670000	1420000	1120000	1400000	158000		383028	325688	256881	321101	321865
846	1650000	1400000	1120000	1390000	154000		378440	321101	256881	318807	318807
847	1640000	1390000	1120000	1380000	149000		376147	318807	256881	316514	317278
848	1630000	1370000	1120000	1370000	145000		373853	314220	256881	314220	314985
849	1610000	1360000	1130000	1360000	140000		369266	311927	259174	311927	313456
850	1600000	1340000	1130000	1360000	136000		366972	307339	259174	311927	311162
851	1580000	1330000	1130000	1350000	132000		362385	305046	259174	309633	308869
852	1570000	1310000	1130000	1340000	128000		360092	300459	259174	307339	306575
853	1560000	1300000	1130000	1330000	124000		357798	298165	259174	305046	305046
854	1540000	1280000	1140000	1320000	120000		353211	293578	261468	302752	302752
855	1530000	1270000	1140000	1310000	116000		350917	291284	261468	300459	301223
856	1520000	1250000	1140000	1300000	112000		348624	286697	261468	298165	298930
857	1500000	1240000	1140000	1300000	108000		344037	284404	261468	298165	296636
858	1490000	1230000	1140000	1290000	105000		341743	282110	261468	295872	295107
859	1480000	1220000	1150000	1280000	101000		339450	279817	263761	293578	294343
860	1470000	1200000	1150000	1270000	97700		337156	275229	263761	291284	292049
861	1450000	1190000	1150000	1270000	94400		332569	272936	263761	291284	289755
862	1440000	1180000	1150000	1260000	91300		330275	270642	263761	288991	288226
863	1430000	1170000	1160000	1250000	88300		327982	268349	266055	286697	287462
864	1420000	1160000	1160000	1240000	85400		325688	266055	266055	284404	285933
865	1400000	1150000	1160000	1240000	82700		321101	263761	266055	284404	283639
866	1390000	1140000	1160000	1230000	80200		318807	261468	266055	282110	282110
867	1380000	1130000	1170000	1220000	77800		316514	259174	268349	279817	281346
868	1370000	1120000	1170000	1220000	75500		314220	256881	268349	279817	279817
869	1360000	1110000	1170000	1210000	73400		311927	254587	268349	277523	278287
870	1340000	1100000	1170000	1210000	71500		307339	252294	268349	277523	275994
871	1330000	1090000	1180000	1200000	69800		305046	250000	270642	275229	275229
872	1320000	1090000	1180000	1200000	68300		302752	250000	270642	275229	274465
873	1310000	1080000	1180000	1190000	67000		300459	247706	270642	272936	272936
874	1300000	1070000	1190000	1190000	65800		298165	245413	272936	272936	272171
875	1290000	1060000	1190000	1180000	64900		295872	243119	272936	270642	270642
876	1280000	1060000	1190000	1180000	64100		293578	243119	272936	270642	269878
877	1270000	1050000	1190000	1170000	63500		291284	240826	272936	268349	268349
878	1260000	1040000	1200000	1170000	63100		288991	238532	275229	268349	267584
879	1250000	1040000	1200000	1160000	62900		286697	238532	275229	266055	266820
880	1240000	1030000	1200000	1160000	62800		284404	236239	275229	266055	265291
881	1230000	1030000	1210000	1150000	63000		282110	236239	277523	263761	265291
882	1220000	1020000	1210000	1150000	63200		279817	233945	277523	263761	263761
883	1210000	1020000	1210000	1150000	63600		277523	233945	277523	263761	262997
884	1200000	1020000	1210000	1140000	64100		275229	233945	277523	261468	262232
885	1190000	1010000	1220000	1140000	64800		272936	231651	279817	261468	261468
886	1180000	1010000	1220000	1140000	65500		270642	231651	279817	261468	260703
887	1170000	1000000	1220000	1130000	66400		268349	229358	279817	259174	259174
888	1160000	1000000	1230000	1130000	67300		266055	229358	282110	259174	259174
889	1160000	999000	1230000	1130000	68300		266055	229128	282110	259174	259098
890	1150000	996000	1230000	1130000	69300		263761	228440	282110	259174	258104
891	1140000	994000	1240000	1120000	70400		261468	227982	284404	256881	257951
892	1130000	992000	1240000	1120000	71600		259174	227523	284404	256881	257034
893	1130000	991000	1240000	1120000	72800		259174	227294	284404	256881	256957
894	1120000	989000	1250000	1120000	74000		256881	226835	286697	256881	256804
895	1110000	988000	1250000	1120000	75200		254587	226606	286697	256881	255963
896	1110000	987000	1250000	1110000	76500		254587	226376	286697	254587	255887
897	1100000	987000	1250000	1110000	77800		252294	226376	286697	254587	255122
898	1090000	986000	1260000	1110000	79000		250000	226147	288991	254587	255046
899	1090000	986000	1260000	1110000	80300		250000	226147	288991	254587	255046
900	1080000	986000	1260000	1110000	81600		247706	226147	288991	254587	254281
901	1070000	987000	1270000	1110000	82900		245413	226376	291284	254587	254358
902	1070000	987000	1270000	1110000	84100		245413	226376	291284	254587	254358
903	1060000	988000	1270000	1110000	85400		243119	226606	291284	254587	253670
904	1060000	989000	1280000	1110000	86600		243119	226835	293578	254587	254511
905	1050000	990000	1280000	1110000	87800		240826	227064	293578	254587	253823
906	1050000	992000	1280000	1110000	89000		240826	227523	293578	254587	253976
907	1040000	994000	1290000	1110000	90200		238532	227982	295872	254587	254128
908	1040000	996000	1290000	1110000	91300		238532	228440	295872	254587	254281
909	1030000	998000	1290000	1110000	92400		236239	228899	295872	254587	253670
910	1030000	1000000	1290000	1110000	93600		236239	229358	295872	254587	253823
911	1030000	1000000	1300000	1110000	94600		236239	229358	298165	254587	254587
912	1020000	1010000	1300000	1110000	95700		233945	231651	298165	254587	254587
913	1020000	1010000	1300000	1110000	96700		233945	231651	298165	254587	254587
914	1020000	1010000	1310000	1110000	97700		233945	231651	300459	254587	255352
915	1010000	1010000	1310000	1110000	98700		231651	231651	300459	254587	254587
916	1010000	1020000	1310000	1110000	99600		231651	233945	300459	254587	255352
917	1010000	1020000	1320000	1110000	101000		231651	233945	302752	254587	256116
918	1000000	1020000	1320000	1120000	101000		229358	233945	302752	256881	255352
919	1000000	1030000	1320000	1120000	102000		229358	236239	302752	256881	256116
920	999000	1030000	1320000	1120000	103000		229128	236239	302752	256881	256040
921	997000	1040000	1330000	1120000	104000		228670	238532	305046	256881	257416
922	994000	1040000	1330000	1120000	105000		227982	238532	305046	256881	257187
923	992000	1040000	1330000	1120000	106000		227523	238532	305046	256881	257034
924	990000	1050000	1330000	1120000	106000		227064	240826	305046	256881	257645
925	988000	1050000	1340000	1130000	107000		226606	240826	307339	259174	258257
926	987000	1060000	1340000	1130000	108000		226376	243119	307339	259174	258945
927	985000	1060000	1340000	1130000	108000		225917	243119	307339	259174	258792
928	984000	1070000	1340000	1130000	109000		225688	245413	307339	259174	259480
929	982000	1070000	1350000	1130000	110000		225229	245413	309633	259174	260092
930	981000	1080000	1350000	1140000	110000		225000	247706	309633	261468	260780
931	980000	1080000	1350000	1140000	111000		224771	247706	309633	261468	260703
932	979000	1090000	1350000	1140000	111000		224541	250000	309633	261468	261391
933	978000	1090000	1360000	1140000	112000		224312	250000	311927	261468	262080
934	977000	1100000	1360000	1140000	113000		224083	252294	311927	261468	262768
935	976000	1100000	1360000	1150000	113000		223853	252294	311927	263761	262691
936	976000	1110000	1360000	1150000	114000		223853	254587	311927	263761	263456
937	975000	1110000	1360000	1150000	114000		223624	254587	311927	263761	263379
938	974000	1120000	1370000	1150000	114000		223394	256881	314220	263761	264832
939	974000	1120000	1370000	1160000	115000		223394	256881	314220	266055	264832
940	973000	1130000	1370000	1160000	115000		223165	259174	314220	266055	265520
941	973000	1140000	1370000	1160000	116000		223165	261468	314220	266055	266284
942	973000	1140000	1370000	1160000	116000		223165	261468	314220	266055	266284
943	972000	1150000	1380000	1160000	117000		222936	263761	316514	266055	267737
944	972000	1150000	1380000	1170000	117000		222936	263761	316514	268349	267737
945	972000	1160000	1380000	1170000	117000		222936	266055	316514	268349	268502
946	972000	1160000	1380000	1170000	118000		222936	266055	316514	268349	268502
947	972000	1170000	1380000	1170000	118000		222936	268349	316514	268349	269266
948	972000	1170000	1380000	1180000	118000		222936	268349	316514	270642	269266
949	971000	1180000	1380000	1180000	119000		222706	270642	316514	270642	269954
950	971000	1180000	1380000	1180000	119000		222706	270642	316514	270642	269954
951	971000	1190000	1380000	1180000	119000		222706	272936	316514	270642	270719
952	971000	1190000	1390000	1180000	120000		222706	272936	318807	270642	271483
953	971000	1200000	1390000	1190000	120000		222706	275229	318807	272936	272248
954	971000	1210000	1390000	1190000	120000		222706	277523	318807	272936	273012
955	971000	1210000	1390000	1190000	121000		222706	277523	318807	272936	273012
956	971000	1220000	1390000	1190000	121000		222706	279817	318807	272936	273777
957	971000	1220000	1390000	1190000	121000		222706	279817	318807	272936	273777
958	971000	1230000	1390000	1190000	122000		222706	282110	318807	272936	274541
959	971000	1230000	1390000	1200000	122000		222706	282110	318807	275229	274541
960	971000	1240000	1390000	1200000	122000		222706	284404	318807	275229	275306
961	970000	1240000	1390000	1200000	122000		222477	284404	318807	275229	275229
962	970000	1240000	1390000	1200000	123000		222477	284404	318807	275229	275229
963	970000	1250000	1390000	1200000	123000		222477	286697	318807	275229	275994
964	970000	1250000	1390000	1200000	123000		222477	286697	318807	275229	275994
965	970000	1260000	1390000	1200000	123000		222477	288991	318807	275229	276758
966	969000	1260000	1390000	1210000	124000		222248	288991	318807	277523	276682
967	969000	1270000	1390000	1210000	124000		222248	291284	318807	277523	277446
968	968000	1270000	1380000	1210000	124000		222018	291284	316514	277523	276606
969	968000	1270000	1380000	1210000	124000		222018	291284	316514	277523	276606
970	968000	1280000	1380000	1210000	124000		222018	293578	316514	277523	277370
971	967000	1280000	1380000	1210000	125000		221789	293578	316514	277523	277294
972	966000	1290000	1380000	1210000	125000		221560	295872	316514	277523	277982
973	966000	1290000	1380000	1210000	125000		221560	295872	316514	277523	277982
974	965000	1290000	1380000	1210000	125000		221330	295872	316514	277523	277905
975	964000	1300000	1370000	1210000	126000		221101	298165	314220	277523	277829
976	964000	1300000	1370000	1210000	126000		221101	298165	314220	277523	277829
977	963000	1300000	1370000	1210000	126000		220872	298165	314220	277523	277752
978	962000	1300000	1370000	1210000	126000		220642	298165	314220	277523	277676
979	961000	1310000	1360000	1210000	126000		220413	300459	311927	277523	277599
980	960000	1310000	1360000	1210000	126000		220183	300459	311927	277523	277523
981	958000	1310000	1360000	1210000	127000		219725	300459	311927	277523	277370
982	957000	1310000	1360000	1210000	127000		219495	300459	311927	277523	277294
983	956000	1320000	1350000	1210000	127000		219266	302752	309633	277523	277217
984	955000	1320000	1350000	1210000	127000		219037	302752	309633	277523	277141
985	953000	1320000	1350000	1210000	127000		218578	302752	309633	277523	276988
986	952000	1320000	1340000	1210000	127000		218349	302752	307339	277523	276147
987	950000	1320000	1340000	1210000	128000		217890	302752	307339	277523	275994
988	948000	1330000	1340000	1200000	128000		217431	305046	307339	275229	276606
989	947000	1330000	1330000	1200000	128000		217202	305046	305046	275229	275765
990	945000	1330000	1330000	1200000	128000		216743	305046	305046	275229	275612
991	943000	1330000	1330000	1200000	128000		216284	305046	305046	275229	275459
992	941000	1330000	1320000	1200000	128000		215826	305046	302752	275229	274541
993	939000	1330000	1320000	1200000	128000		215367	305046	302752	275229	274388
994	937000	1330000	1310000	1190000	128000		214908	305046	300459	272936	273471
995	935000	1330000	1310000	1190000	128000		214450	305046	300459	272936	273318
996	933000	1330000	1300000	1190000	128000		213991	305046	298165	272936	272401
997	930000	1330000	1300000	1190000	128000		213303	305046	298165	272936	272171
998	928000	1330000	1290000	1180000	129000		212844	305046	295872	270642	271254
999	925000	1330000	1290000	1180000	129000		212156	305046	295872	270642	271024
1000	923000	1330000	1280000	1180000	129000		211697	305046	293578	270642	270107
1001	920000	1330000	1280000	1180000	129000		211009	305046	293578	270642	269878
1002	917000	1330000	1270000	1170000	129000		210321	305046	291284	268349	268884
1003	915000	1330000	1270000	1170000	129000		209862	305046	291284	268349	268731
1004	912000	1330000	1260000	1170000	129000		209174	305046	288991	268349	267737
1005	909000	1330000	1250000	1160000	129000		208486	305046	286697	266055	266743
1006	906000	1330000	1250000	1160000	129000		207798	305046	286697	266055	266514
1007	903000	1320000	1240000	1160000	129000		207110	302752	284404	266055	264755
1008	900000	1320000	1230000	1150000	129000		206422	302752	282110	263761	263761
1009	897000	1320000	1230000	1150000	129000		205734	302752	282110	263761	263532
1010	893000	1320000	1220000	1140000	129000		204817	302752	279817	261468	262462
1011	890000	1320000	1210000	1140000	129000		204128	302752	277523	261468	261468
1012	887000	1310000	1210000	1140000	128000		203440	300459	277523	261468	260474
1013	883000	1310000	1200000	1130000	128000		202523	300459	275229	259174	259404
1014	880000	1310000	1190000	1130000	128000		201835	300459	272936	259174	258410
1015	876000	1310000	1190000	1120000	128000		200917	300459	272936	256881	258104
1016	872000	1300000	1180000	1120000	128000		200000	298165	270642	256881	256269
1017	869000	1300000	1170000	1110000	128000		199312	298165	268349	254587	255275
1018	865000	1300000	1160000	1110000	128000		198394	298165	266055	254587	254205
1019	861000	1290000	1160000	1100000	128000		197477	295872	266055	252294	253135
1020	857000	1290000	1150000	1100000	128000		196560	295872	263761	252294	252064
1021	853000	1290000	1140000	1090000	128000		195642	295872	261468	250000	250994
1022	849000	1280000	1130000	1090000	127000		194725	293578	259174	250000	249159
1023	845000	1280000	1130000	1080000	127000		193807	293578	259174	247706	248853
1024	841000	1280000	1120000	1080000	127000		192890	293578	256881	247706	247783
1025	837000	1270000	1110000	1070000	127000		191972	291284	254587	245413	245948
1026	833000	1270000	1100000	1070000	127000		191055	291284	252294	245413	244878
1027	829000	1260000	1090000	1060000	127000		190138	288991	250000	243119	243043
1028	824000	1260000	1080000	1060000	126000		188991	288991	247706	243119	241896
1029	820000	1260000	1080000	1050000	126000		188073	288991	247706	240826	241590
1030	816000	1250000	1070000	1040000	126000		187156	286697	245413	238532	239755
1031	811000	1250000	1060000	1040000	126000		186009	286697	243119	238532	238609
1032	807000	1240000	1050000	1030000	126000		185092	284404	240826	236239	236774
1033	802000	1240000	1040000	1030000	125000		183945	284404	238532	236239	235627
1034	798000	1230000	1030000	1020000	125000		183028	282110	236239	233945	233792
1035	793000	1230000	1020000	1010000	125000		181881	282110	233945	231651	232645
1036	789000	1220000	1010000	1010000	125000		180963	279817	231651	231651	230810
1037	784000	1220000	1000000	1000000	125000		179817	279817	229358	229358	229664
1038	780000	1210000	995000	995000	124000		178899	277523	228211	228211	228211
1039	775000	1210000	986000	989000	124000		177752	277523	226147	226835	227141
1040	770000	1200000	977000	982000	124000		176606	275229	224083	225229	225306
1041	766000	1190000	968000	976000	124000		175688	272936	222018	223853	223547
1042	761000	1190000	958000	969000	123000		174541	272936	219725	222248	222401
1043	756000	1180000	949000	962000	123000		173394	270642	217661	220642	220566
1044	751000	1180000	940000	956000	123000		172248	270642	215596	219266	219495
1045	747000	1170000	930000	949000	123000		171330	268349	213303	217661	217661
1046	742000	1160000	921000	942000	123000		170183	266055	211239	216055	215826
1047	737000	1160000	911000	936000	122000		169037	266055	208945	214679	214679
1048	732000	1150000	902000	929000	122000		167890	263761	206881	213073	212844
1049	727000	1150000	892000	922000	122000		166743	263761	204587	211468	211697
1050	722000	1140000	883000	915000	122000		165596	261468	202523	209862	209862
1051	718000	1130000	873000	908000	121000		164679	259174	200229	208257	208028
1052	713000	1130000	864000	901000	121000		163532	259174	198165	206651	206957
1053	708000	1120000	854000	894000	121000		162385	256881	195872	205046	205046
1054	703000	1110000	845000	887000	121000		161239	254587	193807	203440	203211
1055	698000	1110000	835000	880000	120000		160092	254587	191514	201835	202064
1056	693000	1100000	826000	873000	120000		158945	252294	189450	200229	200229
1057	688000	1090000	816000	866000	120000		157798	250000	187156	198624	198318
1058	683000	1090000	807000	859000	120000		156651	250000	185092	197018	197248
1059	678000	1080000	797000	852000	119000		155505	247706	182798	195413	195336
1060	674000	1070000	787000	845000	119000		154587	245413	180505	193807	193502
1061	669000	1070000	778000	838000	119000		153440	245413	178440	192202	192431
1062	664000	1060000	768000	831000	119000		152294	243119	176147	190596	190520
1063	659000	1050000	759000	824000	119000		151147	240826	174083	188991	188685
1064	654000	1050000	750000	817000	118000		150000	240826	172018	187385	187615
1065	649000	1040000	740000	810000	118000		148853	238532	169725	185780	185703
1066	644000	1030000	731000	803000	118000		147706	236239	167661	184174	183869
1067	640000	1030000	721000	796000	118000		146789	236239	165367	182569	182798
1068	635000	1020000	712000	789000	118000		145642	233945	163303	180963	180963
1069	630000	1010000	703000	782000	117000		144495	231651	161239	179358	179128
1070	625000	1010000	693000	775000	117000		143349	231651	158945	177752	177982
1071	620000	999000	684000	768000	117000		142202	229128	156881	176147	176070
1072	616000	992000	675000	761000	117000		141284	227523	154817	174541	174541
1073	611000	985000	666000	754000	117000		140138	225917	152752	172936	172936
1074	606000	978000	657000	747000	116000		138991	224312	150688	171330	171330
1075	602000	971000	647000	740000	116000		138073	222706	148394	169725	169725
1076	597000	964000	638000	733000	116000		136927	221101	146330	168119	168119
1077	592000	957000	629000	726000	116000		135780	219495	144266	166514	166514
1078	588000	950000	620000	719000	116000		134862	217890	142202	164908	164985
1079	583000	943000	611000	713000	116000		133716	216284	140138	163532	163379
1080	578000	936000	603000	706000	115000		132569	214679	138303	161927	161850
1081	574000	929000	594000	699000	115000		131651	213073	136239	160321	160321
1082	569000	922000	585000	692000	115000		130505	211468	134174	158716	158716
1083	565000	916000	576000	686000	115000		129587	210092	132110	157339	157263
1084	560000	909000	568000	679000	115000		128440	208486	130275	155734	155734
1085	556000	902000	559000	672000	115000		127523	206881	128211	154128	154205
1086	551000	895000	551000	666000	115000		126376	205275	126376	152752	152676
1087	547000	888000	542000	659000	115000		125459	203670	124312	151147	151147
1088	543000	882000	534000	653000	114000		124541	202294	122477	149771	149771
1089	538000	875000	526000	646000	114000		123394	200688	120642	148165	148242
1090	534000	868000	517000	640000	114000		122477	199083	118578	146789	146713
1091	530000	861000	509000	633000	114000		121560	197477	116743	145183	145260
1092	526000	855000	501000	627000	114000		120642	196101	114908	143807	143884
1093	521000	848000	493000	621000	114000		119495	194495	113073	142431	142355
1094	517000	842000	485000	615000	114000		118578	193119	111239	141055	140979
1095	513000	835000	477000	608000	114000		117661	191514	109404	139450	139526
1096	509000	829000	469000	602000	114000		116743	190138	107569	138073	138150
1097	505000	822000	462000	596000	114000		115826	188532	105963	136697	136774
1098	501000	816000	454000	590000	114000		114908	187156	104128	135321	135398
1099	497000	809000	446000	584000	114000		113991	185550	102294	133945	133945
1100	493000	803000	439000	578000	114000		113073	184174	100688	132569	132645
1101	489000	797000	431000	572000	113000		112156	182798	98853.2	131193	131269
1102	485000	791000	424000	567000	113000		111239	181422	97247.7	130046	129969
1103	481000	784000	417000	561000	113000		110321	179817	95642.2	128670	128593
1104	477000	778000	409000	555000	113000		109404	178440	93807.3	127294	127217
1105	474000	772000	402000	549000	113000		108716	177064	92201.8	125917	125994
1106	470000	766000	395000	544000	113000		107798	175688	90596.3	124771	124694
1107	466000	760000	388000	538000	113000		106881	174312	88990.8	123394	123394
1108	462000	754000	381000	533000	113000		105963	172936	87385.3	122248	122095
1109	459000	748000	374000	527000	113000		105275	171560	85779.8	120872	120872
1110	455000	742000	368000	522000	113000		104358	170183	84403.7	119725	119648
1111	452000	737000	361000	516000	113000		103670	169037	82798.2	118349	118502
1112	448000	731000	354000	511000	113000		102752	167661	81192.7	117202	117202
1113	445000	725000	348000	506000	113000		102064	166284	79816.5	116055	116055
1114	441000	719000	341000	501000	113000		101147	164908	78211	114908	114755
1115	438000	714000	335000	496000	113000		100459	163761	76834.9	113761	113685
1116	434000	708000	329000	491000	113000		99541.3	162385	75458.7	112615	112462
1117	431000	703000	323000	486000	113000		98853.2	161239	74082.6	111468	111391
1118	428000	697000	317000	481000	113000		98165.1	159862	72706.4	110321	110245
1119	425000	692000	311000	476000	113000		97477.1	158716	71330.3	109174	109174
1120	421000	687000	305000	471000	113000		96559.6	157569	69954.1	108028	108028
1121	418000	682000	299000	466000	113000		95871.6	156422	68578	106881	106957
1122	415000	676000	293000	461000	113000		95183.5	155046	67201.8	105734	105810
1123	412000	671000	287000	457000	113000		94495.4	153899	65825.7	104817	104740
1124	409000	666000	282000	452000	113000		93807.3	152752	64678.9	103670	103746
1125	406000	661000	276000	448000	113000		93119.3	151606	63302.8	102752	102676
1126	403000	656000	271000	443000	113000		92431.2	150459	62156	101606	101682
1127	400000	651000	265000	439000	113000		91743.1	149312	60779.8	100688	100612
1128	397000	646000	260000	434000	113000		91055	148165	59633	99541.3	99617.7
1129	394000	642000	255000	430000	113000		90367	147248	58486.2	98623.9	98700.3
1130	391000	637000	249000	426000	113000		89678.9	146101	57110.1	97706.4	97630
1131	389000	632000	244000	422000	113000		89220.2	144954	55963.3	96789	96712.5
1132	386000	628000	239000	418000	113000		88532.1	144037	54816.5	95871.6	95795.1
1133	383000	623000	234000	414000	113000		87844	142890	53669.7	94954.1	94801.2
1134	381000	618000	230000	410000	113000		87385.3	141743	52752.3	94036.7	93960.2
1135	378000	614000	225000	406000	113000		86697.2	140826	51605.5	93119.3	93042.8
1136	375000	610000	220000	402000	113000		86009.2	139908	50458.7	92201.8	92125.4
1137	373000	605000	215000	398000	113000		85550.5	138761	49311.9	91284.4	91208
1138	370000	601000	211000	394000	113000		84862.4	137844	48394.5	90367	90367
1139	368000	597000	206000	390000	113000		84403.7	136927	47247.7	89449.5	89526
1140	366000	593000	202000	387000	113000		83945	136009	46330.3	88761.5	88761.5
1141	363000	588000	198000	383000	113000		83256.9	134862	45412.8	87844	87844
1142	361000	584000	193000	379000	113000		82798.2	133945	44266.1	86926.6	87003.1
1143	359000	580000	189000	376000	113000		82339.4	133028	43348.6	86238.5	86238.5
1144	356000	576000	185000	373000	113000		81651.4	132110	42431.2	85550.5	85397.6
1145	354000	572000	181000	369000	113000		81192.7	131193	41513.8	84633	84633
1146	352000	568000	177000	366000	113000		80733.9	130275	40596.3	83945	83868.5
1147	350000	565000	173000	362000	113000		80275.2	129587	39678.9	83027.5	83180.4
1148	348000	561000	169000	359000	113000		79816.5	128670	38761.5	82339.4	82415.9
1149	346000	557000	165000	356000	113000		79357.8	127752	37844	81651.4	81651.4
1150	344000	553000	162000	353000	113000		78899.1	126835	37156	80963.3	80963.3
1151	342000	550000	158000	350000	113000		78440.4	126147	36238.5	80275.2	80275.2
1152	340000	546000	154000	347000	113000		77981.7	125229	35321.1	79587.2	79510.7
1153	338000	543000	151000	344000	113000		77522.9	124541	34633	78899.1	78899.1
1154	336000	539000	147000	341000	113000		77064.2	123624	33715.6	78211	78134.6
1155	334000	536000	144000	338000	113000		76605.5	122936	33027.5	77522.9	77522.9
1156	332000	532000	141000	335000	113000		76146.8	122018	32339.4	76834.9	76834.9
1157	330000	529000	137000	332000	113000		75688.1	121330	31422	76146.8	76146.8
1158	329000	525000	134000	329000	113000		75458.7	120413	30733.9	75458.7	75535.2
1159	327000	522000	131000	327000	113000		75000	119725	30045.9	75000	74923.5
1160	325000	519000	128000	324000	113000		74541.3	119037	29357.8	74311.9	74311.9
1161	324000	516000	125000	321000	113000		74311.9	118349	28669.7	73623.9	73776.8
1162	322000	512000	122000	319000	113000		73853.2	117431	27981.7	73165.1	73088.7
1163	320000	509000	119000	316000	113000		73394.5	116743	27293.6	72477.1	72477.1
1164	319000	506000	116000	314000	113000		73165.1	116055	26605.5	72018.3	71941.9
1165	317000	503000	113000	311000	113000		72706.4	115367	25917.4	71330.3	71330.3
1166	316000	500000	111000	309000	112000		72477.1	114679	25458.7	70871.6	70871.6
1167	315000	497000	108000	306000	112000		72247.7	113991	24770.6	70183.5	70336.4
1168	313000	494000	105000	304000	112000		71789	113303	24082.6	69724.8	69724.8
1169	312000	491000	103000	302000	112000		71559.6	112615	23623.9	69266.1	69266.1
1170	310000	488000	100000	299000	112000		71100.9	111927	22935.8	68578	68654.4
1171	309000	485000	97500	297000	112000		70871.6	111239	22362.4	68119.3	68157.5
1172	308000	482000	95100	295000	112000		70642.2	110550	21811.9	67660.6	67668.2
1173	307000	479000	92700	293000	112000		70412.8	109862	21261.5	67201.8	67178.9
1174	305000	476000	90300	291000	112000		69954.1	109174	20711	66743.1	66613.1
1175	304000	474000	88000	289000	112000		69724.8	108716	20183.5	66284.4	66208
1176	303000	471000	85800	287000	111000		69495.4	108028	19678.9	65825.7	65733.9
1177	302000	468000	83600	285000	111000		69266.1	107339	19174.3	65367	65259.9
1178	301000	465000	81400	283000	111000		69036.7	106651	18669.7	64908.3	64785.9
1179	300000	463000	79300	281000	111000		68807.3	106193	18188.1	64449.5	64396
1180	299000	460000	77200	279000	111000		68578	105505	17706.4	63990.8	63929.7
1181	298000	457000	75200	277000	111000		68348.6	104817	17247.7	63532.1	63470.9
1182	297000	454000	73200	275000	111000		68119.3	104128	16789	63073.4	63012.2
1183	296000	452000	71300	273000	110000		67889.9	103670	16353.2	62614.7	62637.6
1184	295000	449000	69400	271000	110000		67660.6	102982	15917.4	62156	62186.5
1185	294000	447000	67600	269000	110000		67431.2	102523	15504.6	61697.2	61819.6
1186	293000	444000	65700	268000	110000		67201.8	101835	15068.8	61467.9	61368.5
1187	292000	441000	63900	266000	110000		66972.5	101147	14656	61009.2	60925.1
1188	292000	439000	62200	264000	110000		66972.5	100688	14266.1	60550.5	60642.2
1189	291000	436000	60500	262000	109000		66743.1	100000	13876.1	60091.7	60206.4
1190	290000	434000	58900	261000	109000		66513.8	99541.3	13509.2	59862.4	59854.7
1191	289000	431000	57300	259000	109000		66284.4	98853.2	13142.2	59403.7	59426.6
1192	289000	428000	55700	258000	109000		66284.4	98165.1	12775.2	59174.3	59074.9
1193	288000	426000	54100	256000	108000		66055	97706.4	12408.3	58715.6	58723.2
1194	287000	423000	52600	254000	108000		65825.7	97018.3	12064.2	58256.9	58302.8
1195	286000	421000	51200	253000	108000		65596.3	96559.6	11743.1	58027.5	57966.4
1196	286000	418000	49700	251000	108000		65596.3	95871.6	11399.1	57568.8	57622.3
1197	285000	416000	48300	250000	108000		65367	95412.8	11078	57339.4	57285.9
1198	285000	413000	47000	248000	107000		65367	94724.8	10779.8	56880.7	56957.2
1199	284000	411000	45600	247000	107000		65137.6	94266.1	10458.7	56651.4	56620.8
1200	283000	408000	44300	245000	107000		64908.3	93578	10160.6	56192.7	56215.6
1201	283000	406000	43100	244000	106000		64908.3	93119.3	9885.32	55963.3	55970.9
1202	282000	403000	41800	242000	106000		64678.9	92431.2	9587.16	55504.6	55565.7
1203	282000	400000	40600	241000	106000		64678.9	91743.1	9311.93	55275.2	55244.6
1204	281000	398000	39400	240000	106000		64449.5	91284.4	9036.7	55045.9	54923.5
1205	281000	395000	38300	238000	105000		64449.5	90596.3	8784.4	54587.2	54610.1
1206	280000	393000	37100	237000	105000		64220.2	90137.6	8509.17	54357.8	54289
1207	280000	390000	36000	235000	105000		64220.2	89449.5	8256.88	53899.1	53975.5
1208	280000	388000	35000	234000	104000		64220.2	88990.8	8027.52	53669.7	53746.2
1209	279000	385000	33900	233000	104000		63990.8	88302.8	7775.23	53440.4	53356.3
1210	279000	383000	32900	231000	104000		63990.8	87844	7545.87	52981.7	53126.9
1211	278000	380000	31900	230000	103000		63761.5	87156	7316.51	52752.3	52744.6
1212	278000	378000	31000	229000	103000		63761.5	86697.2	7110.09	52522.9	52522.9
1213	278000	375000	30000	228000	103000		63761.5	86009.2	6880.73	52293.6	52217.1
1214	277000	373000	29100	226000	102000		63532.1	85550.5	6674.31	51834.9	51919
1215	277000	370000	28200	225000	102000		63532.1	84862.4	6467.89	51605.5	51620.8
1216	277000	367000	27400	224000	102000		63532.1	84174.3	6284.4	51376.1	51330.3
1217	276000	365000	26500	223000	101000		63302.8	83715.6	6077.98	51146.8	51032.1
1218	276000	362000	25700	221000	101000		63302.8	83027.5	5894.5	50688.1	50741.6
1219	276000	360000	24900	220000	101000		63302.8	82568.8	5711.01	50458.7	50527.5
1220	276000	357000	24100	219000	100000		63302.8	81880.7	5527.52	50229.4	50237
1221	275000	354000	23400	218000	99800		63073.4	81192.7	5366.97	50000	49877.7
1222	275000	352000	22600	216000	99500		63073.4	80733.9	5183.49	49541.3	49663.6
1223	275000	349000	21900	215000	99100		63073.4	80045.9	5022.94	49311.9	49380.7
1224	274000	347000	21200	214000	98700		62844	79587.2	4862.39	49082.6	49097.9
1225	274000	344000	20500	213000	98300		62844	78899.1	4701.83	48853.2	48815
1226	274000	341000	19800	212000	97900		62844	78211	4541.28	48623.9	48532.1
1227	274000	339000	19200	211000	97500		62844	77752.3	4403.67	48394.5	48333.3
1228	274000	336000	18600	209000	97100		62844	77064.2	4266.06	47935.8	48058.1
1229	273000	333000	17900	208000	96700		62614.7	76376.1	4105.5	47706.4	47698.8
1230	273000	331000	17300	207000	96300		62614.7	75917.4	3967.89	47477.1	47500
1231	273000	328000	16800	206000	95900		62614.7	75229.4	3853.21	47247.7	47232.4
1232	273000	325000	16200	205000	95500		62614.7	74541.3	3715.6	47018.3	46957.2
1233	273000	323000	15700	204000	95100		62614.7	74082.6	3600.92	46789	46766.1
1234	272000	320000	15200	203000	94700		62385.3	73394.5	3486.24	46559.6	46422
1235	272000	317000	14700	201000	94300		62385.3	72706.4	3371.56	46100.9	46154.4
1236	272000	315000	14200	200000	93900		62385.3	72247.7	3256.88	45871.6	45963.3
1237	272000	312000	13700	199000	93500		62385.3	71559.6	3142.2	45642.2	45695.7
1238	272000	309000	13200	198000	93000		62385.3	70871.6	3027.52	45412.8	45428.1
1239	271000	307000	12600	197000	92700		62156	70412.8	2889.91	45183.5	45152.9
1240	271000	304000	12200	196000	92200		62156	69724.8	2798.17	44954.1	44893
1241	271000	301000	11800	195000	91800		62156	69036.7	2706.42	44724.8	44633
1242	271000	298000	11400	194000	91400		62156	68348.6	2614.68	44495.4	44373.1
1243	271000	296000	11000	192000	91000		62156	67889.9	2522.94	44036.7	44189.6
1244	270000	293000	10600	191000	90600		61926.6	67201.8	2431.19	43807.3	43853.2
1245	270000	290000	10300	190000	90100		61926.6	66513.8	2362.39	43578	43600.9
1246	270000	287000	9900	189000	89700		61926.6	65825.7	2270.64	43348.6	43341
1247	270000	284000	9550	188000	89300		61926.6	65137.6	2190.37	43119.3	43084.9
1248	270000	282000	9220	187000	88900		61926.6	64678.9	2114.68	42889.9	42906.7
1249	269000	279000	8890	186000	88500		61697.2	63990.8	2038.99	42660.6	42575.7
1250	269000	276000	8580	185000	88100		61697.2	63302.8	1967.89	42431.2	42322.6
1251	269000	273000	8270	184000	87600		61697.2	62614.7	1896.79	42201.8	42069.6
1252	269000	271000	7980	182000	87200		61697.2	62156	1830.28	41743.1	41894.5
1253	269000	268000	7690	181000	86800		61697.2	61467.9	1763.76	41513.8	41643
1254	268000	265000	7410	180000	86400		61467.9	60779.8	1699.54	41284.4	41315.7
1255	268000	262000	7140	179000	86000		61467.9	60091.7	1637.61	41055	41065.7
1256	268000	259000	6880	178000	85600		61467.9	59403.7	1577.98	40825.7	40816.5
1257	268000	257000	6630	177000	85200		61467.9	58945	1520.64	40596.3	40644.5
1258	267000	254000	6390	176000	84800		61238.5	58256.9	1465.6	40367	40320.3
1259	267000	251000	6150	175000	84400		61238.5	57568.8	1410.55	40137.6	40072.6
1260	267000	248000	5920	174000	84000		61238.5	56880.7	1357.8	39908.3	39825.7
1261	266000	245000	5700	173000	83600		61009.2	56192.7	1307.34	39678.9	39503.1
1262	266000	243000	5490	171000	83200		61009.2	55733.9	1259.17	39220.2	39334.1
1263	266000	240000	5280	170000	82900		61009.2	55045.9	1211.01	38990.8	39088.7
1264	266000	237000	5080	169000	82500		61009.2	54357.8	1165.14	38761.5	38844
1265	265000	234000	4890	168000	82100		60779.8	53669.7	1121.56	38532.1	38523.7
1266	265000	231000	4700	167000	81700		60779.8	52981.7	1077.98	38302.8	38279.8
1267	265000	229000	4530	166000	81400		60779.8	52522.9	1038.99	38073.4	38113.9
1268	264000	226000	4350	165000	81000		60550.5	51834.9	997.706	37844	37794.3
1269	264000	223000	4180	164000	80700		60550.5	51146.8	958.716	37614.7	37552
1270	264000	220000	4020	163000	80300		60550.5	50458.7	922.018	37385.3	37310.4
1271	263000	218000	3870	162000	80000		60321.1	50000	887.615	37156	37069.6
1272	263000	215000	3660	161000	79600		60321.1	49311.9	839.45	36926.6	36824.2
1273	263000	212000	3510	159000	79300		60321.1	48623.9	805.046	36467.9	36583.3
1274	262000	209000	3380	158000	79000		60091.7	47935.8	775.229	36238.5	36267.6
1275	262000	207000	3240	157000	78600		60091.7	47477.1	743.119	36009.2	36104
1276	261000	204000	3060	156000	78300		59862.4	46789	701.835	35779.8	35784.4
1277	261000	201000	2940	155000	78000		59862.4	46100.9	674.312	35550.5	35545.9
1278	260000	199000	2820	154000	77700		59633	45642.2	646.789	35321.1	35307.3
1279	260000	196000	2710	153000	77300		59633	44954.1	621.56	35091.7	35069.6
1280	260000	193000	2600	152000	77000		59633	44266.1	596.33	34862.4	34831.8
1281	259000	191000	2500	151000	76700		59403.7	43807.3	573.394	34633	34594.8
1282	259000	188000	2400	150000	76400		59403.7	43119.3	550.459	34403.7	34357.8
1283	258000	185000	2300	149000	76100		59174.3	42431.2	527.523	34174.3	34044.3
1284	258000	183000	2210	147000	75800		59174.3	41972.5	506.881	33715.6	33884.6
1285	257000	180000	2120	146000	75500		58945	41284.4	486.239	33486.2	33571.9
1286	257000	177000	2030	145000	75200		58945	40596.3	465.596	33256.9	33335.6
1287	256000	175000	1950	144000	74900		58715.6	40137.6	447.248	33027.5	33100.2
1288	255000	172000	1870	143000	74600		58486.2	39449.5	428.899	32798.2	32788.2
1289	255000	170000	1790	142000	74300		58486.2	38990.8	410.55	32568.8	32629.2
1290	254000	167000	1720	141000	74100		58256.9	38302.8	394.495	32339.4	32318
1291	254000	165000	1650	140000	73800		58256.9	37844	378.44	32110.1	32159.8
1292	253000	162000	1580	139000	73500		58027.5	37156	362.385	31880.7	31848.6
1293	252000	160000	1510	138000	73200		57798.2	36697.2	346.33	31651.4	31613.9
1294	252000	157000	1450	137000	73000		57798.2	36009.2	332.569	31422	31380
1295	251000	155000	1380	136000	72700		57568.8	35550.5	316.514	31192.7	31145.3
1296	250000	152000	1330	135000	72400		57339.4	34862.4	305.046	30963.3	30835.6
1297	250000	150000	1270	134000	72200		57339.4	34403.7	291.284	30733.9	30678.1
1298	249000	147000	1210	133000	71900		57110.1	33715.6	277.523	30504.6	30367.7
1299	248000	145000	1160	131000	71700		56880.7	33256.9	266.055	30045.9	30134.6
1300	248000	143000	1110	130000	71400		56880.7	32798.2	254.587	29816.5	29977.8
1301	247000	140000	1060	129000	71200		56651.4	32110.1	243.119	29587.2	29668.2
1302	246000	138000	1020	128000	70900		56422	31651.4	233.945	29357.8	29435.8
1303	245000	135000	972	127000	70700		56192.7	30963.3	222.936	29128.4	29126.3
1304	245000	133000	930	126000	70400		56192.7	30504.6	213.303	28899.1	28970.2
1305	244000	131000	889	125000	70200		55963.3	30045.9	203.899	28669.7	28737.7
1306	243000	129000	849	124000	69900		55733.9	29587.2	194.725	28440.4	28505.3
1307	242000	126000	811	123000	69700		55504.6	28899.1	186.009	28211	28196.6
1308	241000	124000	775	122000	69400		55275.2	28440.4	177.752	27981.7	27964.4
1309	240000	122000	740	121000	69200		55045.9	27981.7	169.725	27752.3	27732.4
1310	240000	120000	707	120000	69000		55045.9	27522.9	162.156	27522.9	27577
1311	239000	118000	675	119000	68700		54816.5	27064.2	154.817	27293.6	27345.2
1312	238000	115000	644	118000	68500		54587.2	26376.1	147.706	27064.2	27037
1313	237000	113000	575	117000	68200		54357.8	25917.4	131.881	26834.9	26802.4
1314	236000	111000	549	116000	68000		54128.4	25458.7	125.917	26605.5	26571
1315	235000	109000	524	115000	67700		53899.1	25000	120.183	26376.1	26339.8
1316	234000	107000	500	114000	67500		53669.7	24541.3	114.679	26146.8	26108.6
1317	233000	105000	477	113000	67300		53440.4	24082.6	109.404	25917.4	25877.4
1318	232000	103000	455	112000	67000		53211	23623.9	104.358	25688.1	25646.4
1319	231000	101000	434	111000	66800		52981.7	23165.1	99.5413	25458.7	25415.4
1320	230000	99200	414	110000	66500		52752.3	22752.3	94.9541	25229.4	25199.8
1321	229000	97300	395	109000	66300		52522.9	22316.5	90.5963	25000	24976.7
1322	228000	95300	377	108000	66000		52293.6	21857.8	86.4679	24770.6	24745.9
1323	227000	93400	359	107000	65800		52064.2	21422	82.3394	24541.3	24522.9
1324	226000	91600	342	106000	65500		51834.9	21009.2	78.4404	24311.9	24307.5
1325	225000	89800	326	105000	65300		51605.5	20596.3	74.7706	24082.6	24092.2
1326	224000	87900	311	104000	65000		51376.1	20160.6	71.3303	23853.2	23869.3
1327	223000	86200	296	103000	64700		51146.8	19770.6	67.8899	23623.9	23661.8
1328	222000	84400	282	102000	64500		50917.4	19357.8	64.6789	23394.5	23446.6
1329	220000	82700	268	101000	64200		50458.7	18967.9	61.4679	23165.1	23162.7
1330	219000	80900	256	100000	63900		50229.4	18555	58.7156	22935.8	22947.7
1331	218000	79200	243	99200	63700		50000	18165.1	55.7339	22752.3	22740.3
1332	217000	77600	231	98200	63400		49770.6	17798.2	52.9817	22522.9	22540.6
1333	216000	75900	220	97300	63100		49541.3	17408.3	50.4587	22316.5	22333.3
1334	215000	74300	209	96400	62800		49311.9	17041.3	47.9358	22110.1	22133.7
1335	213000	72700	199	95400	62600		48853.2	16674.3	45.6422	21880.7	21857.7
1336	212000	71100	189	94500	62300		48623.9	16307.3	43.3486	21674.3	21658.2
1337	211000	69600	180	93600	62000		48394.5	15963.3	41.2844	21467.9	21466.4
1338	210000	68100	171	92600	61700		48165.1	15619.3	39.2202	21238.5	21274.5
1339	208000	66500	163	91700	61400		47706.4	15252.3	37.3853	21032.1	20998.7
1340	207000	65100	155	90800	61100		47477.1	14931.2	35.5505	20825.7	20814.6
1341	206000	63600	147	89900	60800		47247.7	14587.2	33.7156	20619.3	20622.9
1342	205000	62200	139	89000	60500		47018.3	14266.1	31.8807	20412.8	20438.8
1343	203000	60800	132	88100	60200		46559.6	13945	30.2752	20206.4	20178.3
1344	202000	59400	126	87200	59900		46330.3	13623.9	28.8991	20000	19994.3
1345	201000	58000	119	86300	59600		46100.9	13302.8	27.2936	19793.6	19810.3
1346	199000	56600	113	85400	59300		45642.2	12981.7	25.9174	19587.2	19549.9
1347	198000	55300	107	84500	59000		45412.8	12683.5	24.5413	19380.7	19373.6
1348	197000	54000	102	83600	58700		45183.5	12385.3	23.3945	19174.3	19197.4
1349	195000	52700	96.7	82700	58300		44724.8	12087.2	22.1789	18967.9	18944.7
1350	194000	51500	91.7	81900	58000		44495.4	11811.9	21.0321	18784.4	18776.1
1351	193000	50200	86.9	81000	57700		44266.1	11513.8	19.9312	18578	18599.9
1352	191000	49000	82.4	80100	57300		43807.3	11238.5	18.8991	18371.6	18354.9
1353	190000	47800	78.1	79300	57000		43578	10963.3	17.9128	18188.1	18186.4
1354	189000	46700	74	78400	56700		43348.6	10711	16.9725	17981.7	18025.5
1355	187000	45500	70.1	77600	56300		42889.9	10435.8	16.078	17798.2	17780.6
1356	186000	44400	66.4	76700	56000		42660.6	10183.5	15.2294	17591.7	17619.8
1357	184000	43300	62.9	75900	55600		42201.8	9931.19	14.4266	17408.3	17382.5
1358	183000	42200	59.5	75000	55300		41972.5	9678.9	13.6468	17201.8	17221.7
1359	181000	41200	56.4	74200	54900		41513.8	9449.54	12.9358	17018.3	16992.1
1360	180000	40100	53.3	73400	54500		41284.4	9197.25	12.2248	16834.9	16831.3
1361	179000	39100	50.5	72600	54200		41055	8967.89	11.5826	16651.4	16678.2
1362	177000	38100	47.7	71800	53800		40596.3	8738.53	10.9404	16467.9	16448.6
1363	176000	37100	45.2	70900	53400		40367	8509.17	10.367	16261.5	16295.5
1364	174000	36200	0	70100	53100		39908.3	8302.75	0	16078	16070.3
1365	173000	35200	0	69300	52700		39678.9	8073.39	0	15894.5	15917.4
1366	171000	34300	0	68500	52300		39220.2	7866.97	0	15711	15695.7
1367	170000	33400	0	67700	51900		38990.8	7660.55	0	15527.5	15550.5
1368	168000	32500	0	67000	51600		38532.1	7454.13	0	15367	15328.7
1369	167000	31700	0	66200	51200		38302.8	7270.64	0	15183.5	15191.1
1370	165000	30800	0	65400	50800		37844	7064.22	0	15000	14969.4
1371	164000	30000	0	64600	50400		37614.7	6880.73	0	14816.5	14831.8
1372	162000	29200	0	63900	50000		37156	6697.25	0	14656	14617.7
1373	161000	28400	0	63100	49600		36926.6	6513.76	0	14472.5	14480.1
1374	159000	27600	0	62300	49200		36467.9	6330.28	0	14289	14266.1
1375	158000	26900	0	61600	48800		36238.5	6169.72	0	14128.4	14136.1
1376	156000	26100	0	60900	48400		35779.8	5986.24	0	13967.9	13922
1377	155000	25400	0	60100	48000		35550.5	5825.69	0	13784.4	13792
1378	153000	24600	0	59400	47600		35091.7	5642.2	0	13623.9	13578
1379	152000	23900	0	58600	47200		34862.4	5481.65	0	13440.4	13448
1380	150000	23300	0	57900	46800		34403.7	5344.04	0	13279.8	13249.2
1381	149000	22600	0	57200	46300		34174.3	5183.49	0	13119.3	13119.3
1382	147000	22000	0	56500	45900		33715.6	5045.87	0	12958.7	12920.5
1383	146000	21300	0	55700	45500		33486.2	4885.32	0	12775.2	12790.5
1384	144000	20700	0	55000	45100		33027.5	4747.71	0	12614.7	12591.7
1385	143000	20100	0	54300	44700		32798.2	4610.09	0	12454.1	12469.4
1386	141000	19500	0	53600	44200		32339.4	4472.48	0	12293.6	12270.6
1387	140000	19000	0	52900	43800		32110.1	4357.8	0	12133	12156
1388	138000	18400	0	52300	43400		31651.4	4220.18	0	11995.4	11957.2
1389	137000	17900	0	51600	43000		31422	4105.5	0	11834.9	11842.5
1390	135000	17300	0	50900	42500		30963.3	3967.89	0	11674.3	11643.7
1391	134000	16800	0	50200	42100		30733.9	3853.21	0	11513.8	11529.1
1392	132000	16300	0	49600	41700		30275.2	3738.53	0	11376.1	11337.9
1393	131000	15800	0	48900	41300		30045.9	3623.85	0	11215.6	11223.2
1394	129000	15300	0	48200	40800		29587.2	3509.17	0	11055	11032.1
1395	128000	14900	0	47600	40400		29357.8	3417.43	0	10917.4	10925.1
1396	126000	14400	0	46900	40000		28899.1	3302.75	0	10756.9	10733.9
1397	125000	14000	0	46300	39500		28669.7	3211.01	0	10619.3	10626.9
1398	123000	13500	0	45700	39100		28211	3096.33	0	10481.7	10435.8
1399	122000	13100	0	45000	38700		27981.7	3004.59	0	10321.1	10328.7
1400	121000	12700	0	44400	38200		27752.3	2912.84	0	10183.5	10221.7
1401	119000	12300	0	43800	37800		27293.6	2821.1	0	10045.9	10038.2
1402	118000	11900	0	43200	37400		27064.2	2729.36	0	9908.26	9931.19
1403	116000	11500	0	42600	37000		26605.5	2637.61	0	9770.64	9747.71
1404	115000	11200	0	42000	36500		26376.1	2568.81	0	9633.03	9648.32
1405	113000	10800	0	41400	36100		25917.4	2477.06	0	9495.41	9464.83
1406	112000	10500	0	40800	35700		25688.1	2408.26	0	9357.8	9365.44
1407	110000	10100	0	40200	35200		25229.4	2316.51	0	9220.18	9181.96
1408	109000	9790	0	39600	34800		25000	2245.41	0	9082.57	9081.8
1409	108000	9470	0	39000	34400		24770.6	2172.02	0	8944.95	8980.89
1410	106000	9160	0	38400	34000		24311.9	2100.92	0	8807.34	8804.28
1411	105000	8860	0	37900	33500		24082.6	2032.11	0	8692.66	8704.89
1412	103000	8570	0	37300	33100		23623.9	1965.6	0	8555.05	8529.82
1413	102000	8280	0	36700	32700		23394.5	1899.08	0	8417.43	8431.19
1414	101000	8010	0	36200	32300		23165.1	1837.16	0	8302.75	8334.1
1415	99200	7740	0	35600	31900		22752.3	1775.23	0	8165.14	8175.84
1416	97800	7480	0	35100	31400		22431.2	1715.6	0	8050.46	8048.93
1417	96500	7220	0	34600	31000		22133	1655.96	0	7935.78	7929.66
1418	95100	6980	0	34000	30600		21811.9	1600.92	0	7798.17	7804.28
1419	93800	6740	0	33500	30200		21513.8	1545.87	0	7683.49	7686.54
1420	92400	6510	0	33000	29800		21192.7	1493.12	0	7568.81	7561.93
1421	91100	6280	0	32500	29400		20894.5	1440.37	0	7454.13	7444.95
1422	89800	6070	0	31900	29000		20596.3	1392.2	0	7316.51	7329.51
1423	88500	5860	0	31400	28600		20298.2	1344.04	0	7201.83	7214.07
1424	87100	5650	0	30900	28200		19977.1	1295.87	0	7087.16	7090.98
1425	85900	5450	0	30400	27800		19701.8	1250	0	6972.48	6983.94
1426	84600	5260	0	29900	27400		19403.7	1206.42	0	6857.8	6870.03
1427	83300	5070	0	29500	27000		19105.5	1162.84	0	6766.06	6756.12
1428	82000	4890	0	29000	26600		18807.3	1121.56	0	6651.38	6642.97
1429	80800	4720	0	28500	26200		18532.1	1082.57	0	6536.7	6538.23
1430	79500	4550	0	28000	25800		18233.9	1043.58	0	6422.02	6425.84
1431	78300	4390	0	27600	25400		17958.7	1006.88	0	6330.28	6321.87
1432	77100	4230	0	27100	25000		17683.5	970.183	0	6215.6	6217.89
1433	75800	4080	0	26600	24600		17385.3	935.78	0	6100.92	6107.03
1434	74600	3930	0	26200	24300		17110.1	901.376	0	6009.17	6003.82
1435	73400	3780	0	25700	23900		16834.9	866.972	0	5894.5	5900.61
1436	72300	3640	0	25300	23500		16582.6	834.862	0	5802.75	5805.81
1437	71100	3510	0	24900	23100		16307.3	805.046	0	5711.01	5704.13
1438	69900	3380	0	24400	22800		16032.1	775.229	0	5596.33	5602.45
1439	68800	3250	0	24000	22400		15779.8	745.413	0	5504.59	5508.41
1440	67600	3130	0	23600	22000		15504.6	717.89	0	5412.84	5407.49
1441	66500	3020	0	23200	21700		15252.3	692.661	0	5321.1	5314.98
1442	65400	2900	0	22800	21300		15000	665.138	0	5229.36	5221.71
1443	64300	2790	0	22400	21000		14747.7	639.908	0	5137.61	5129.2
1444	63200	2690	0	22000	20600		14495.4	616.972	0	5045.87	5037.46
1445	62100	2580	0	21600	20300		14243.1	591.743	0	4954.13	4944.95
1446	61000	2480	0	21200	19900		13990.8	568.807	0	4862.39	4853.21
1447	60000	2390	0	20800	19600		13761.5	548.165	0	4770.64	4769.88
1448	58900	2300	0	20400	19300		13509.2	527.523	0	4678.9	4678.9
1449	57900	2210	0	20000	18900		13279.8	506.881	0	4587.16	4595.57
1450	56800	2120	0	19700	18600		13027.5	486.239	0	4518.35	4504.59
1451	55800	2040	0	19300	18300		12798.2	467.89	0	4426.61	4422.02
1452	54800	1960	0	18900	18000		12568.8	449.541	0	4334.86	4339.45
1453	53800	1880	0	18600	17600		12339.4	431.193	0	4266.06	4256.88
1454	52800	1810	0	18200	17300		12110.1	415.138	0	4174.31	4175.08
1455	51900	1740	0	17900	17000		11903.7	399.083	0	4105.5	4100.92
1456	50900	1670	0	17500	16700		11674.3	383.028	0	4013.76	4019.11
1457	50000	1600	0	17200	16400		11467.9	366.972	0	3944.95	3944.95
1458	49000	1540	0	16900	16100		11238.5	353.211	0	3876.15	3863.91
1459	48100	1480	0	16500	15800		11032.1	339.45	0	3784.4	3790.52
1460	47200	1420	0	16200	15500		10825.7	325.688	0	3715.6	3717.13
1461	46300	1360	0	15900	15200		10619.3	311.927	0	3646.79	3643.73
1462	45400	1300	0	15600	14900		10412.8	298.165	0	3577.98	3570.34
1463	44500	1250	0	15300	14600		10206.4	286.697	0	3509.17	3497.71
1464	43600	1200	0	14900	14400		10000	275.229	0	3417.43	3425.08
1465	42800	1150	0	14600	14100		9816.51	263.761	0	3348.62	3360.09
1466	41900	1100	0	14300	13800		9610.09	252.294	0	3279.82	3287.46
1467	41100	1060	0	14100	13500		9426.61	243.119	0	3233.94	3223.24
1468	40300	1010	0	13800	13300		9243.12	231.651	0	3165.14	3158.26
1469	39500	971	0	13500	13000		9059.63	222.706	0	3096.33	3094.11
1470	38700	930	0	13200	12700		8876.15	213.303	0	3027.52	3029.82
1471	37900	891	0	12900	12500		8692.66	204.358	0	2958.72	2965.67
1472	37100	853	0	12700	12200		8509.17	195.642	0	2912.84	2901.61
1473	36400	817	0	12400	12000		8348.62	187.385	0	2844.04	2845.34
1474	35600	783	0	12100	11700		8165.14	179.587	0	2775.23	2781.57
1475	34900	749	0	11900	11500		8004.59	171.789	0	2729.36	2725.46
1476	34100	717	0	11600	11300		7821.1	164.45	0	2660.55	2661.85
1477	33400	686	0	11400	11000		7660.55	157.339	0	2614.68	2605.96
1478	32700	657	0	11100	10800		7500	150.688	0	2545.87	2550.23
1479	32000	628	0	10900	10600		7339.45	144.037	0	2500	2494.5
1480	31300	601	0	10600	10300		7178.9	137.844	0	2431.19	2438.91
1481	30700	575	0	10400	10100		7041.28	131.881	0	2385.32	2391.06
1482	30000	550	0	10200	9910		6880.73	126.147	0	2339.45	2335.63
1483	29300	526	0	9950	9690		6720.18	120.642	0	2282.11	2280.28
1484	28700	503	0	9730	9480		6582.57	115.367	0	2231.65	2232.65
1485	28100	481	0	9510	9280		6444.95	110.321	0	2181.19	2185.09
1486	27400	459	0	9300	9070		6284.4	105.275	0	2133.03	2129.89
1487	26800	439	0	9090	8870		6146.79	100.688	0	2084.86	2082.49
1488	26200	419	0	8880	8670		6009.17	96.1009	0	2036.7	2035.09
1489	25600	401	0	8680	8480		5871.56	91.9725	0	1990.83	1987.84
1490	25100	383	0	8480	8290		5756.88	87.844	0	1944.95	1948.24
1491	24500	365	0	8280	8100		5619.27	83.7156	0	1899.08	1900.99
1492	23900	349	0	8090	7920		5481.65	80.0459	0	1855.5	1853.9
1493	23400	333	0	7900	7740		5366.97	76.3761	0	1811.93	1814.45
1494	22800	318	0	7720	7560		5229.36	72.9358	0	1770.64	1767.43
1495	22300	303	0	7540	7390		5114.68	69.4954	0	1729.36	1728.06
1496	21800	290	0	7360	7210		5000	66.5138	0	1688.07	1688.84
1497	21300	276	0	7180	7050		4885.32	63.3028	0	1646.79	1649.54
1498	20800	264	0	7010	6880		4770.64	60.5505	0	1607.8	1610.4
1499	20300	251	0	6840	6720		4655.96	57.5688	0	1568.81	1571.18
1500	19800	240	0	6680	6560		4541.28	55.0459	0	1532.11	1532.11
1501	19300	229	0	6520	6400		4426.61	52.5229	0	1495.41	1493.04
1502	18900	218	0	6360	6250		4334.86	50	0	1458.72	1461.62
1503	18400	208	0	6200	6100		4220.18	47.7064	0	1422.02	1422.63
1504	17900	198	0	6050	5950		4105.5	45.4128	0	1387.61	1383.64
1505	17500	189	0	5900	5800		4013.76	43.3486	0	1353.21	1352.37
1506	17100	180	0	5750	5660		3922.02	41.2844	0	1318.81	1321.1
1507	16700	171	0	5610	5520		3830.28	39.2202	0	1286.7	1289.83
1508	16200	163	0	5470	5390		3715.6	37.3853	0	1254.59	1250.99
1509	15800	155	0	5330	5250		3623.85	35.5505	0	1222.48	1219.8
1510	15400	148	0	5190	5120		3532.11	33.945	0	1190.37	1188.69
1511	15000	141	0	5060	4990		3440.37	32.3394	0	1160.55	1157.57
1512	14700	134	0	4930	4870		3371.56	30.7339	0	1130.73	1134.1
1513	14300	128	0	4810	4740		3279.82	29.3578	0	1103.21	1103.06
1514	13900	121	0	4680	4620		3188.07	27.7523	0	1073.39	1071.94
1515	13600	115	0	4560	4500		3119.27	26.3761	0	1045.87	1048.55
1516	13200	110	0	4440	4390		3027.52	25.2294	0	1018.35	1017.58
1517	12900	0	0	4290	4290		2958.72	0	0	983.945	986.239
1518	12500	0	0	4180	4180		2866.97	0	0	958.716	955.657
1519	12200	0	0	4070	4070		2798.17	0	0	933.486	932.722
1520	11900	0	0	3960	3960		2729.36	0	0	908.257	909.786
1521	11600	0	0	3860	3860		2660.55	0	0	885.321	886.85
1522	11300	0	0	3750	3750		2591.74	0	0	860.092	863.914
1523	11000	0	0	3650	3650		2522.94	0	0	837.156	840.979
1524	10700	0	0	3560	3560		2454.13	0	0	816.514	818.043
1525	10400	0	0	3460	3460		2385.32	0	0	793.578	795.107
1526	10100	0	0	3370	3370		2316.51	0	0	772.936	772.171
1527	9780	0	0	3260	3260		2243.12	0	0	747.706	747.706
1528	9520	0	0	3170	3170		2183.49	0	0	727.064	727.829
1529	9250	0	0	3090	3090		2121.56	0	0	708.716	707.187
1530	9000	0	0	3000	3000		2064.22	0	0	688.073	688.073
1531	8750	0	0	2920	2920		2006.88	0	0	669.725	668.96
1532	8510	0	0	2840	2840		1951.83	0	0	651.376	650.612
1533	8270	0	0	2760	2760		1896.79	0	0	633.028	632.263
1534	8040	0	0	2680	2680		1844.04	0	0	614.679	614.679
1535	7810	0	0	2600	2600		1791.28	0	0	596.33	597.095
1536	7590	0	0	2530	2530		1740.83	0	0	580.275	580.275
1537	7380	0	0	2460	2460		1692.66	0	0	564.22	564.22
1538	7170	0	0	2390	2390		1644.5	0	0	548.165	548.165
1539	6960	0	0	2320	2320		1596.33	0	0	532.11	532.11
1540	6760	0	0	2250	2250		1550.46	0	0	516.055	516.82
1541	6570	0	0	2190	2190		1506.88	0	0	502.294	502.294
1542	6380	0	0	2130	2130		1463.3	0	0	488.532	487.768
1543	6190	0	0	2060	2060		1419.72	0	0	472.477	473.242
1544	6010	0	0	2000	2000		1378.44	0	0	458.716	459.48
1545	5830	0	0	1940	1940		1337.16	0	0	444.954	445.719
1546	5660	0	0	1890	1890		1298.17	0	0	433.486	432.722
1547	5490	0	0	1830	1830		1259.17	0	0	419.725	419.725
1548	5330	0	0	1780	1780		1222.48	0	0	408.257	407.492
1549	5170	0	0	1720	1720		1185.78	0	0	394.495	395.26
1550	5010	0	0	1670	1670		1149.08	0	0	383.028	383.028
1551	4860	0	0	1620	1620		1114.68	0	0	371.56	371.56
1552	4720	0	0	1570	1570		1082.57	0	0	360.092	360.856
1553	4570	0	0	1520	1520		1048.17	0	0	348.624	349.388
1554	4430	0	0	1480	1480		1016.06	0	0	339.45	338.685
1555	4300	0	0	1430	1430		986.239	0	0	327.982	328.746
1556	4160	0	0	1390	1390		954.128	0	0	318.807	318.043
1557	4040	0	0	1350	1350		926.606	0	0	309.633	308.869
1558	3910	0	0	1300	1300		896.789	0	0	298.165	298.93
1559	3790	0	0	1260	1260		869.266	0	0	288.991	289.755
1560	3670	0	0	1220	1220		841.743	0	0	279.817	280.581
1561	3550	0	0	1180	1180		814.22	0	0	270.642	271.407
1562	3440	0	0	1150	1150		788.991	0	0	263.761	262.997
1563	3330	0	0	1110	1110		763.761	0	0	254.587	254.587
1564	3230	0	0	1080	1080		740.826	0	0	247.706	246.942
1565	3120	0	0	1040	1040		715.596	0	0	238.532	238.532
1566	3020	0	0	1010	1010		692.661	0	0	231.651	230.887
1567	2930	0	0	976	976		672.018	0	0	223.853	224.006
1568	2830	0	0	944	944		649.083	0	0	216.514	216.361
1569	2740	0	0	914	914		628.44	0	0	209.633	209.48
1570	2650	0	0	884	884		607.798	0	0	202.752	202.599
1571	2560	0	0	855	855		587.156	0	0	196.101	195.719
1572	2480	0	0	827	827		568.807	0	0	189.679	189.602
1573	2400	0	0	800	800		550.459	0	0	183.486	183.486
1574	2320	0	0	773	773		532.11	0	0	177.294	177.37
1575	2240	0	0	748	748		513.761	0	0	171.56	171.254
1576	2170	0	0	723	723		497.706	0	0	165.826	165.902
1577	2100	0	0	699	699		481.651	0	0	160.321	160.55
1578	2030	0	0	675	675		465.596	0	0	154.817	155.199
1579	1960	0	0	652	652		449.541	0	0	149.541	149.847
1580	1890	0	0	630	630		433.486	0	0	144.495	144.495
1581	1830	0	0	609	609		419.725	0	0	139.679	139.908
1582	1760	0	0	588	588		403.67	0	0	134.862	134.557
1583	1700	0	0	568	568		389.908	0	0	130.275	129.969
1584	1650	0	0	549	549		378.44	0	0	125.917	126.147
1585	1590	0	0	530	530		364.679	0	0	121.56	121.56
1586	1530	0	0	511	511		350.917	0	0	117.202	116.972
1587	1480	0	0	494	494		339.45	0	0	113.303	113.15
1588	1430	0	0	476	476		327.982	0	0	109.174	109.327
1589	1380	0	0	460	460		316.514	0	0	105.505	105.505
1590	1330	0	0	444	444		305.046	0	0	101.835	101.682
1591	1280	0	0	428	428		293.578	0	0	98.1651	97.8593
1592	1240	0	0	413	413		284.404	0	0	94.7248	94.8012
1593	1200	0	0	398	398		275.229	0	0	91.2844	91.7431
1594	1150	0	0	384	384		263.761	0	0	88.0734	87.9205
1595	1110	0	0	370	370		254.587	0	0	84.8624	84.8624
1596	1070	0	0	357	357		245.413	0	0	81.8807	81.8043
1597	1030	0	0	344	344		236.239	0	0	78.8991	78.7462
1598	996	0	0	332	332		228.44	0	0	76.1468	76.1468
1599	960	0	0	320	320		220.183	0	0	73.3945	73.3945
1600	925	0	0	308	308		212.156	0	0	70.6422	70.7187
1601	891	0	0	297	297		204.358	0	0	68.1193	68.1193
1602	859	0	0	286	286		197.018	0	0	65.5963	65.6728
1603	827	0	0	276	276		189.679	0	0	63.3028	63.2263
1604	797	0	0	266	266		182.798	0	0	61.0092	60.9327
1605	767	0	0	256	256		175.917	0	0	58.7156	58.6391
1606	739	0	0	246	246		169.495	0	0	56.422	56.4985
1607	711	0	0	237	237		163.073	0	0	54.3578	54.3578
1608	685	0	0	228	228		157.11	0	0	52.2936	52.37
1609	659	0	0	220	220		151.147	0	0	50.4587	50.3823
1610	634	0	0	211	211		145.413	0	0	48.3945	48.4709
1611	611	0	0	204	204		140.138	0	0	46.789	46.7125
1612	587	0	0	196	196		134.633	0	0	44.9541	44.8777
1613	565	0	0	188	188		129.587	0	0	43.1193	43.1957
1614	544	0	0	181	181		124.771	0	0	41.5138	41.5902
1615	523	0	0	174	174		119.954	0	0	39.9083	39.9847
1616	503	0	0	168	168		115.367	0	0	38.5321	38.4557
1617	483	0	0	161	161		110.78	0	0	36.9266	36.9266
1618	465	0	0	155	155		106.651	0	0	35.5505	35.5505
1619	447	0	0	149	149		102.523	0	0	34.1743	34.1743
1620	430	0	0	143	143		98.6239	0	0	32.7982	32.8746
1621	413	0	0	138	138		94.7248	0	0	31.6514	31.5749
1622	397	0	0	132	132		91.055	0	0	30.2752	30.3517
1623	381	0	0	127	127		87.3853	0	0	29.1284	29.1284
1624	366	0	0	122	122		83.945	0	0	27.9817	27.9817
1625	352	0	0	117	117		80.7339	0	0	26.8349	26.9113
1626	338	0	0	113	113		77.5229	0	0	25.9174	25.841
1627	324	0	0	108	108		74.3119	0	0	24.7706	24.7706
1628	311	0	0	104	104		71.3303	0	0	23.8532	23.7768
1629	299	0	0	99.7	99.7		68.578	0	0	22.867	22.8593
1630	287	0	0	95.7	95.7		65.8257	0	0	21.9495	21.9419
1631	276	0	0	91.8	91.8		63.3028	0	0	21.055	21.1009
1632	264	0	0	88.1	88.1		60.5505	0	0	20.2064	20.1835
1633	254	0	0	84.6	84.6		58.2569	0	0	19.4037	19.419
1634	243	0	0	81.1	81.1		55.7339	0	0	18.6009	18.578
1635	234	0	0	77.8	77.8		53.6697	0	0	17.844	17.8899
1636	224	0	0	74.7	74.7		51.3761	0	0	17.133	17.1254
1637	215	0	0	71.6	71.6		49.3119	0	0	16.422	16.4373
1638	206	0	0	68.7	68.7		47.2477	0	0	15.7569	15.7492
1639	198	0	0	65.8	65.8		45.4128	0	0	15.0917	15.1376
1640	189	0	0	63.1	63.1		43.3486	0	0	14.4725	14.4495
1641	182	0	0	60.5	60.5		41.7431	0	0	13.8761	13.9144
1642	174	0	0	58	58		39.9083	0	0	13.3028	13.3028
1643	167	0	0	55.6	55.6		38.3028	0	0	12.7523	12.7676
1644	160	0	0	53.2	53.2		36.6972	0	0	12.2018	12.2324
1645	153	0	0	51	51		35.0917	0	0	11.6972	11.6972
1646	147	0	0	48.9	48.9		33.7156	0	0	11.2156	11.2385
1647	140	0	0	46.8	46.8		32.1101	0	0	10.7339	10.7034
1648	134	0	0	44.8	44.8		30.7339	0	0	10.2752	10.2446
1649	129	0	0	42.9	42.9		29.5872	0	0	9.83945	9.86239
1650	123	0	0	41.1	41.1		28.211	0	0	9.42661	9.40367
1651	118	0	0	39.3	39.3		27.0642	0	0	9.01376	9.02141
1652	113	0	0	37.7	37.7		25.9174	0	0	8.64679	8.63914
1653	108	0	0	36	36		24.7706	0	0	8.25688	8.25688
1654	103	0	0	34.5	34.5		23.6239	0	0	7.91284	7.87462
1655	99	0	0	33	33		22.7064	0	0	7.56881	7.56881
1656	94.7	0	0	31.6	31.6		21.7202	0	0	7.24771	7.24006
1657	90.6	0	0	30.2	30.2		20.7798	0	0	6.92661	6.92661
1658	86.7	0	0	28.9	28.9		19.8853	0	0	6.62844	6.62844
1659	82.9	0	0	27.6	27.6		19.0138	0	0	6.33028	6.33792
1660	79.2	0	0	26.4	26.4		18.1651	0	0	6.05505	6.05505
1661	75.8	0	0	25.3	25.3		17.3853	0	0	5.80275	5.79511
1662	72.4	0	0	24.1	24.1		16.6055	0	0	5.52752	5.53517
1663	69.2	0	0	23.1	23.1		15.8716	0	0	5.29817	5.29052
1664	66.2	0	0	22.1	22.1		15.1835	0	0	5.06881	5.06116
1665	63.2	0	0	21.1	21.1		14.4954	0	0	4.83945	4.8318
1666	0	0	0	0	0		0	0	0	0	0
1667	0	0	0	0	0		0	0	0	0	0
1668	0	0	0	0	0		0	0	0	0	0
1669	0	0	0	0	0		0	0	0	0	0
1670	0	0	0	0	0		0	0	0	0	0
1671	0	0	0	0	0		0	0	0	0	0
1672	0	0	0	0	0		0	0	0	0	0
1673	0	0	0	0	0		0	0	0	0	0
1674	0	0	0	0	0		0	0	0	0	0
1675	0	0	0	0	0		0	0	0	0	0
1676	0	0	0	0	0		0	0	0	0	0
1677	0	0	0	0	0		0	0	0	0	0
1678	0	0	0	0	0		0	0	0	0	0
1679	0	0	0	0	0		0	0	0	0	0
1680	0	0	0	0	0		0	0	0	0	0
1681	0	0	0	0	0		0	0	0	0	0
1682	0	0	0	0	0		0	0	0	0	0
1683	0	0	0	0	0		0	0	0	0	0
1684	0	0	0	0	0		0	0	0	0	0
1685	0	0	0	0	0		0	0	0	0	0
1686	0	0	0	0	0		0	0	0	0	0
1687	0	0	0	0	0		0	0	0	0	0
1688	0	0	0	0	0		0	0	0	0	0
1689	0	0	0	0	0		0	0	0	0	0
1690	0	0	0	0	0		0	0	0	0	0
1691	0	0	0	0	0		0	0	0	0	0
1692	0	0	0	0	0		0	0	0	0	0
1693	0	0	0	0	0		0	0	0	0	0
1694	0	0	0	0	0		0	0	0	0	0
1695	0	0	0	0	0		0	0	0	0	0
1696	0	0	0	0	0		0	0	0	0	0
1697	0	0	0	0	0		0	0	0	0	0
1698	0	0	0	0	0		0	0	0	0	0
1699	0	0	0	0	0		0	0	0	0	0
1700	0	0	0	0	0		0	0	0	0	0
1701	0	0	0	0	0		0	0	0	0	0
1702	0	0	0	0	0		0	0	0	0	0
1703	0	0	0	0	0		0	0	0	0	0
1704	0	0	0	0	0		0	0	0	0	0
1705	0	0	0	0	0		0	0	0	0	0
1706	0	0	0	0	0		0	0	0	0	0
1707	0	0	0	0	0		0	0	0	0	0
1708	0	0	0	0	0		0	0	0	0	0
1709	0	0	0	0	0		0	0	0	0	0
1710	0	0	0	0	0		0	0	0	0	0
1711	0	0	0	0	0		0	0	0	0	0
1712	0	0	0	0	0		0	0	0	0	0
1713	0	0	0	0	0		0	0	0	0	0
1714	0	0	0	0	0		0	0	0	0	0
1715	0	0	0	0	0		0	0	0	0	0
1716	0	0	0	0	0		0	0	0	0	0
1717	0	0	0	0	0		0	0	0	0	0
1718	0	0	0	0	0		0	0	0	0	0
1719	0	0	0	0	0		0	0	0	0	0
1720	0	0	0	0	0		0	0	0	0	0
1721	0	0	0	0	0		0	0	0	0	0
1722	0	0	0	0	0		0	0	0	0	0
1723	0	0	0	0	0		0	0	0	0	0
1724	0	0	0	0	0		0	0	0	0	0
1725	0	0	0	0	0		0	0	0	0	0
1726	0	0	0	0	0		0	0	0	0	0
1727	0	0	0	0	0		0	0	0	0	0
1728	0	0	0	0	0		0	0	0	0	0
1729	0	0	0	0	0		0	0	0	0	0
1730	0	0	0	0	0		0	0	0	0	0
1731	0	0	0	0	0		0	0	0	0	0
1732	0	0	0	0	0		0	0	0	0	0
1733	0	0	0	0	0		0	0	0	0	0
1734	0	0	0	0	0		0	0	0	0	0
1735	0	0	0	0	0		0	0	0	0	0
1736	0	0	0	0	0		0	0	0	0	0
1737	0	0	0	0	0		0	0	0	0	0
1738	0	0	0	0	0		0	0	0	0	0
1739	0	0	0	0	0		0	0	0	0	0
1740	0	0	0	0	0		0	0	0	0	0
1741	0	0	0	0	0		0	0	0	0	0
1742	0	0	0	0	0		0	0	0	0	0
1743	0	0	0	0	0		0	0	0	0	0
1744	0	0	0	0	0		0	0	0	0	0
1745	0	0	0	0	0		0	0	0	0	0
1746	0	0	0	0	0		0	0	0	0	0
1747	0	0	0	0	0		0	0	0	0	0
1748	0	0	0	0	0		0	0	0	0	0
1749	0	0	0	0	0		0	0	0	0	0
1750	0	0	0	0	0		0	0	0	0	0
1751	0	0	0	0	0		0	0	0	0	0
1752	0	0	0	0	0		0	0	0	0	0
1753	0	0	0	0	0		0	0	0	0	0
1754	0	0	0	0	0		0	0	0	0	0
1755	0	0	0	0	0		0	0	0	0	0
1756	0	0	0	0	0		0	0	0	0	0
1757	0	0	0	0	0		0	0	0	0	0
1758	0	0	0	0	0		0	0	0	0	0
1759	0	0	0	0	0		0	0	0	0	0
1760	0	0	0	0	0		0	0	0	0	0
1761	0	0	0	0	0		0	0	0	0	0
1762	0	0	0	0	0		0	0	0	0	0
1763	0	0	0	0	0		0	0	0	0	0
1764	0	0	0	0	0		0	0	0	0	0
1765	0	0	0	0	0		0	0	0	0	0
1766	0	0	0	0	0		0	0	0	0	0
1767	0	0	0	0	0		0	0	0	0	0
1768	0	0	0	0	0		0	0	0	0	0
1769	0	0	0	0	0		0	0	0	0	0
1770	0	0	0	0	0		0	0	0	0	0
1771	0	0	0	0	0		0	0	0	0	0
1772	0	0	0	0	0		0	0	0	0	0
1773	0	0	0	0	0		0	0	0	0	0
1774	0	0	0	0	0		0	0	0	0	0
1775	0	0	0	0	0		0	0	0	0	0
1776	0	0	0	0	0		0	0	0	0	0
1777	0	0	0	0	0		0	0	0	0	0
1778	0	0	0	0	0		0	0	0	0	0
1779	0	0	0	0	0		0	0	0	0	0
1780	0	0	0	0	0		0	0	0	0	0
1781	0	0	0	0	0		0	0	0	0	0
1782	0	0	0	0	0		0	0	0	0	0
1783	0	0	0	0	0		0	0	0	0	0
1784	0	0	0	0	0		0	0	0	0	0
1785	0	0	0	0	0		0	0	0	0	0
1786	0	0	0	0	0		0	0	0	0	0
1787	0	0	0	0	0		0	0	0	0	0
1788	0	0	0	0	0		0	0	0	0	0
1789	0	0	0	0	0		0	0	0	0	0
1790	0	0	0	0	0		0	0	0	0	0
1791	0	0	0	0	0		0	0	0	0	0
1792	0	0	0	0	0		0	0	0	0	0
1793	0	0	0	0	0		0	0	0	0	0
1794	0	0	0	0	0		0	0	0	0	0
1795	0	0	0	0	0		0	0	0	0	0
1796	0	0	0	0	0		0	0	0	0	0
1797	0	0	0	0	0		0	0	0	0	0
1798	0	0	0	0	0		0	0	0	0	0
1799	0	0	0	0	0		0	0	0	0	0
1800	0	0	0	0	0		0	0	0	0	0
1801	0	0	0	0	0		0	0	0	0	0
1802	0	0	0	0	0		0	0	0	0	0
1803	0	0	0	0	0		0	0	0	0	0
1804	0	0	0	0	0		0	0	0	0	0
1805	0	0	0	0	0		0	0	0	0	0
1806	0	0	0	0	0		0	0	0	0	0
1807	0	0	0	0	0		0	0	0	0	0
1808	0	0	0	0	0		0	0	0	0	0
1809	0	0	0	0	0		0	0	0	0	0
1810	0	0	0	0	0		0	0	0	0	0
1811	0	0	0	0	0		0	0	0	0	0
1812	0	0	0	0	0		0	0	0	0	0
1813	0	0	0	0	0		0	0	0	0	0
1814	0	0	0	0	0		0	0	0	0	0
1815	0	0	0	0	0		0	0	0	0	0
1816	0	0	0	0	0		0	0	0	0	0
1817	0	0	0	0	0		0	0	0	0	0
1818	0	0	0	0	0		0	0	0	0	0
1819	0	0	0	0	0		0	0	0	0	0
1820	0	0	0	0	0		0	0	0	0	0
1821	0	0	0	0	0		0	0	0	0	0
1822	0	0	0	0	0		0	0	0	0	0
1823	0	0	0	0	0		0	0	0	0	0
1824	0	0	0	0	0		0	0	0	0	0
1825	0	0	0	0	0		0	0	0	0	0
1826	0	0	0	0	0		0	0	0	0	0
1827	0	0	0	0	0		0	0	0	0	0
1828	0	0	0	0	0		0	0	0	0	0
1829	0	0	0	0	0		0	0	0	0	0
1830	0	0	0	0	0		0	0	0	0	0
1831	0	0	0	0	0		0	0	0	0	0
1832	0	0	0	0	0		0	0	0	0	0
1833	0	0	0	0	0		0	0	0	0	0
1834	0	0	0	0	0		0	0	0	0	0
1835	0	0	0	0	0		0	0	0	0	0
1836	0	0	0	0	0		0	0	0	0	0
1837	0	0	0	0	0		0	0	0	0	0
1838	0	0	0	0	0		0	0	0	0	0
1839	0	0	0	0	0		0	0	0	0	0
1840	0	0	0	0	0		0	0	0	0	0
1841	0	0	0	0	0		0	0	0	0	0
1842	0	0	0	0	0		0	0	0	0	0
1843	0	0	0	0	0		0	0	0	0	0
1844	0	0	0	0	0		0	0	0	0	0
1845	0	0	0	0	0		0	0	0	0	0
1846	0	0	0	0	0		0	0	0	0	0
1847	0	0	0	0	0		0	0	0	0	0
1848	0	0	0	0	0		0	0	0	0	0
1849	0	0	0	0	0		0	0	0	0	0
1850	0	0	0	0	0		0	0	0	0	0
1851	0	0	0	0	0		0	0	0	0	0
1852	0	0	0	0	0		0	0	0	0	0
1853	0	0	0	0	0		0	0	0	0	0
1854	0	0	0	0	0		0	0	0	0	0
1855	0	0	0	0	0		0	0	0	0	0
1856	0	0	0	0	0		0	0	0	0	0
1857	0	0	0	0	0		0	0	0	0	0
1858	0	0	0	0	0		0	0	0	0	0
1859	0	0	0	0	0		0	0	0	0	0
1860	0	0	0	0	0		0	0	0	0	0
1861	0	0	0	0	0		0	0	0	0	0
1862	0	0	0	0	0		0	0	0	0	0
1863	0	0	0	0	0		0	0	0	0	0
1864	0	0	0	0	0		0	0	0	0	0
1865	0	0	0	0	0		0	0	0	0	0
1866	0	0	0	0	0		0	0	0	0	0
1867	0	0	0	0	0		0	0	0	0	0
1868	0	0	0	0	0		0	0	0	0	0
1869	0	0	0	0	0		0	0	0	0	0
1870	0	0	0	0	0		0	0	0	0	0
1871	0	0	0	0	0		0	0	0	0	0
1872	0	0	0	0	0		0	0	0	0	0
1873	0	0	0	0	0		0	0	0	0	0
1874	0	0	0	0	0		0	0	0	0	0
1875	0	0	0	0	0		0	0	0	0	0
1876	0	0	0	0	0		0	0	0	0	0
1877	0	0	0	0	0		0	0	0	0	0
1878	0	0	0	0	0		0	0	0	0	0
1879	0	0	0	0	0		0	0	0	0	0
1880	0	0	0	0	0		0	0	0	0	0
1881	0	0	0	0	0		0	0	0	0	0
1882	0	0	0	0	0		0	0	0	0	0
1883	0	0	0	0	0		0	0	0	0	0
1884	0	0	0	0	0		0	0	0	0	0
1885	0	0	0	0	0		0	0	0	0	0
1886	0	0	0	0	0		0	0	0	0	0
1887	0	0	0	0	0		0	0	0	0	0
1888	0	0	0	0	0		0	0	0	0	0
1889	0	0	0	0	0		0	0	0	0	0
1890	0	0	0	0	0		0	0	0	0	0
1891	0	0	0	0	0		0	0	0	0	0
1892	0	0	0	0	0		0	0	0	0	0
1893	0	0	0	0	0		0	0	0	0	0
1894	0	0	0	0	0		0	0	0	0	0
1895	0	0	0	0	0		0	0	0	0	0
1896	0	0	0	0	0		0	0	0	0	0
1897	0	0	0	0	0		0	0	0	0	0
1898	0	0	0	0	0		0	0	0	0	0
1899	0	0	0	0	0		0	0	0	0	0
1900	0	0	0	0	0		0	0	0	0	0
1901	0	0	0	0	0		0	0	0	0	0
1902	0	0	0	0	0		0	0	0	0	0
1903	0	0	0	0	0		0	0	0	0	0
1904	0	0	0	0	0		0	0	0	0	0
1905	0	0	0	0	0		0	0	0	0	0
1906	0	0	0	0	0		0	0	0	0	0
1907	0	0	0	0	0		0	0	0	0	0
1908	0	0	0	0	0		0	0	0	0	0
1909	0	0	0	0	0		0	0	0	0	0
1910	0	0	0	0	0		0	0	0	0	0
1911	0	0	0	0	0		0	0	0	0	0
1912	0	0	0	0	0		0	0	0	0	0
1913	0	0	0	0	0		0	0	0	0	0
1914	0	0	0	0	0		0	0	0	0	0
1915	0	0	0	0	0		0	0	0	0	0
1916	0	0	0	0	0		0	0	0	0	0
1917	0	0	0	0	0		0	0	0	0	0
1918	0	0	0	0	0		0	0	0	0	0
1919	0	0	0	0	0		0	0	0	0	0
1920	0	0	0	0	0		0	0	0	0	0
1921	0	0	0	0	0		0	0	0	0	0
1922	0	0	0	0	0		0	0	0	0	0
1923	0	0	0	0	0		0	0	0	0	0
1924	0	0	0	0	0		0	0	0	0	0
1925	0	0	0	0	0		0	0	0	0	0
1926	0	0	0	0	0		0	0	0	0	0
1927	0	0	0	0	0		0	0	0	0	0
1928	0	0	0	0	0		0	0	0	0	0
1929	0	0	0	0	0		0	0	0	0	0
1930	0	0	0	0	0		0	0	0	0	0
1931	0	0	0	0	0		0	0	0	0	0
1932	0	0	0	0	0		0	0	0	0	0
1933	0	0	0	0	0		0	0	0	0	0
1934	0	0	0	0	0		0	0	0	0	0
1935	0	0	0	0	0		0	0	0	0	0
1936	0	0	0	0	0		0	0	0	0	0
1937	0	0	0	0	0		0	0	0	0	0
1938	0	0	0	0	0		0	0	0	0	0
1939	0	0	0	0	0		0	0	0	0	0
1940	0	0	0	0	0		0	0	0	0	0
1941	0	0	0	0	0		0	0	0	0	0
1942	0	0	0	0	0		0	0	0	0	0
1943	0	0	0	0	0		0	0	0	0	0
1944	0	0	0	0	0		0	0	0	0	0
1945	0	0	0	0	0		0	0	0	0	0
1946	0	0	0	0	0		0	0	0	0	0
1947	0	0	0	0	0		0	0	0	0	0
1948	0	0	0	0	0		0	0	0	0	0
1949	0	0	0	0	0		0	0	0	0	0
1950	0	0	0	0	0		0	0	0	0	0
1951	0	0	0	0	0		0	0	0	0	0
1952	0	0	0	0	0		0	0	0	0	0
1953	0	0	0	0	0		0	0	0	0	0
1954	0	0	0	0	0		0	0	0	0	0
1955	0	0	0	0	0		0	0	0	0	0
1956	0	0	0	0	0		0	0	0	0	0
1957	0	0	0	0	0		0	0	0	0	0
1958	0	0	0	0	0		0	0	0	0	0
1959	0	0	0	0	0		0	0	0	0	0
1960	0	0	0	0	0		0	0	0	0	0
1961	0	0	0	0	0		0	0	0	0	0
1962	0	0	0	0	0		0	0	0	0	0
1963	0	0	0	0	0		0	0	0	0	0
1964	0	0	0	0	0		0	0	0	0	0
1965	0	0	0	0	0		0	0	0	0	0
1966	0	0	0	0	0		0	0	0	0	0
1967	0	0	0	0	0		0	0	0	0	0
1968	0	0	0	0	0		0	0	0	0	0
1969	0	0	0	0	0		0	0	0	0	0
1970	0	0	0	0	0		0	0	0	0	0
1971	0	0	0	0	0		0	0	0	0	0
1972	0	0	0	0	0		0	0	0	0	0
1973	0	0	0	0	0		0	0	0	0	0
1974	0	0	0	0	0		0	0	0	0	0
1975	0	0	0	0	0		0	0	0	0	0
1976	0	0	0	0	0		0	0	0	0	0
1977	0	0	0	0	0		0	0	0	0	0
1978	0	0	0	0	0		0	0	0	0	0
1979	0	0	0	0	0		0	0	0	0	0
1980	0	0	0	0	0		0	0	0	0	0
1981	0	0	0	0	0		0	0	0	0	0
1982	0	0	0	0	0		0	0	0	0	0
1983	0	0	0	0	0		0	0	0	0	0
1984	0	0	0	0	0		0	0	0	0	0
1985	0	0	0	0	0		0	0	0	0	0
1986	0	0	0	0	0		0	0	0	0	0
1987	0	0	0	0	0		0	0	0	0	0
1988	0	0	0	0	0		0	0	0	0	0
1989	0	0	0	0	0		0	0	0	0	0
1990	0	0	0	0	0		0	0	0	0	0
1991	0	0	0	0	0		0	0	0	0	0
1992	0	0	0	0	0		0	0	0	0	0
1993	0	0	0	0	0		0	0	0	0	0
1994	0	0	0	0	0		0	0	0	0	0
1995	0	0	0	0	0		0	0	0	0	0
1996	0	0	0	0	0		0	0	0	0	0
1997	0	0	0	0	0		0	0	0	0	0
1998	0	0	0	0	0		0	0	0	0	0
[truncated: 1 more rows]

## Sheet: Cells per Volume
		A: 31-159	B: 31-159
		8.66675e+11	644089222000
		874703308011	634568150000
		880781155800	644029730000
		874054406700	640735490000
	total average	8.74053e+11	640855648000
	Standard Error	51831674000	33364680000
	total average	101871	146985	144.286	0.44
	Live cells	93721.3	130817	139.581	0.4
	Standard Error	6040.99	7652.45
		A: 31-101	B: 31-101
		5.76684e+11	499769222000
		595931408011	499898150000
		611759555800	508479730000
		594792806700	502545490000
	total average	5.94792e+11	502673148000
	Standard Error	34975233000	22763380000
	total average	67212.6	115292	171.533	0.72
	Live cells	61835.6	102610	165.94	0.66
	Standard Error
