# Supplementary material for: An extracellular vesicle targeting ligand that binds to Arc proteins and facilitates Arc transport in vivo
Source: eLife journal article supplement (doi:10.7554/elife.82874), 2023-06-16

Add supernatant (EV fraction)  
from S2 cells expressing V5-Sas<sup>FL</sup>

(-)

+ Ptp10D

+ numb

+ Ptp10D & numb

50 kDa ►

IB:  $\beta$ -Tubulin

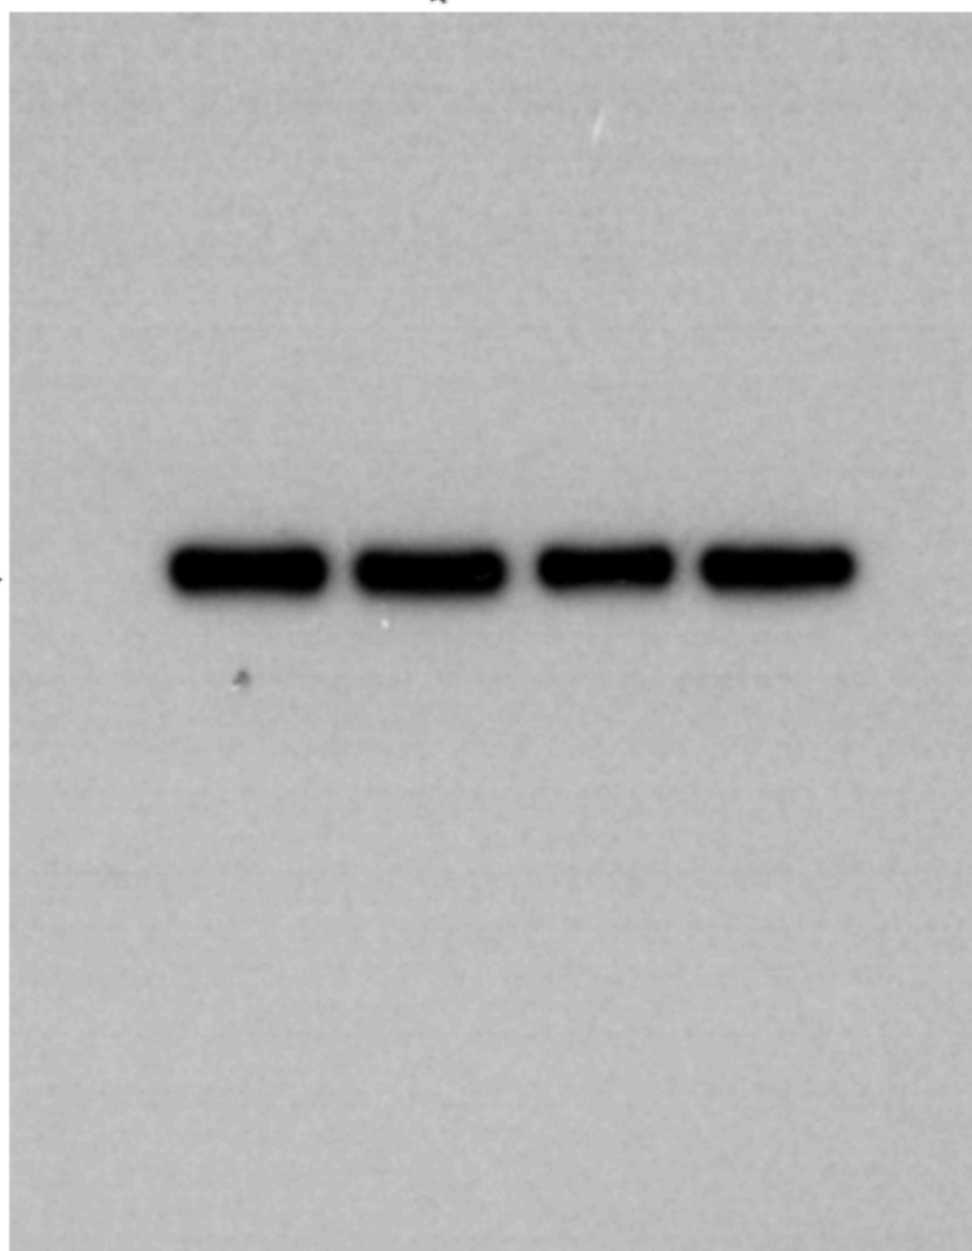

Supplement: fig3-data1 [file elife-82874-fig3-data1-v2.zip]
