# Supplementary material for: An extracellular vesicle targeting ligand that binds to Arc proteins and facilitates Arc transport in vivo
Source: eLife journal article supplement (doi:10.7554/elife.82874), 2023-06-16
Supplement: fig3-data1 [file Figure 3H densitometry.xlsx]

## Sheet: Fig 3g Densitometry
V5-SasFL sup swap	2021-02-17				2021-02-24	8/4,11/2017		Average	STDEV
(-)	7109	12645	17831	9163	6999	3457		9534	5057.53	53.0473
10D/numb GOF	26005	80241	39969	28847	21460	16490		35502	23300.9	65.6325
10D/numb GOF/(-)	3.65804	6.34567	2.24155	3.1482	3.06615	4.77003		3.87161	1.46989
Sup swap	2018-08-10
dArc1 Sup > (-)	5273
dArc1/SasFL Sup > (-)	15896	3.0146
dArc1/sas(dS) Sup > (-)	14260	2.70434
			V5-SasFL Sup + 3rd IL IDs
V5-SasFL Sup + 3rd IL IDs	3ABC									Average	STDEV
ap > +	53556		ap > +	72368	89486	66068	65496	97478		78179.2	14505.2	18.5538
ap > 10D	74626	1.39342
ap > 10D,numb	354350	6.61644	ap > 10D,numb	257548	193063	282295	221485	235712		238021	34064.2	14.3115
											%
										3.04455	43.572
			100	387	100	304
				147		43.6
