# Supplementary material for: An extracellular vesicle targeting ligand that binds to Arc proteins and facilitates Arc transport in vivo
Source: eLife journal article supplement (doi:10.7554/elife.82874), 2023-06-16

|                                                                            | Input 1% |    |    |    | IP: Myc Nanobody |    |    |    |
|----------------------------------------------------------------------------|----------|----|----|----|------------------|----|----|----|
| V5-mCD8 <sup>XCD</sup> -sas <sup>TM</sup> -GFP <sup>37aa</sup>             | +        | -- | -- | -- | +                | -- | -- | -- |
| V5-mCD8 <sup>XCD</sup> -sas <sup>TM</sup> -ICD                             | --       | +  | -- | -- | --               | +  | -- | -- |
| V5-mCD8 <sup>XCD</sup> -sas <sup>TM</sup> -App <sup>ICD</sup>              | --       | -- | +  | -- | --               | -- | +  | -- |
| V5-mCD8 <sup>XCD</sup> -sas <sup>TM</sup> -App <sup>I</sup> <sup>ICD</sup> | --       | -- | -- | +  | --               | -- | -- | +  |
| Myc-rArc                                                                   | +        | +  | +  | +  | +                | +  | +  | +  |

~29 kDa →

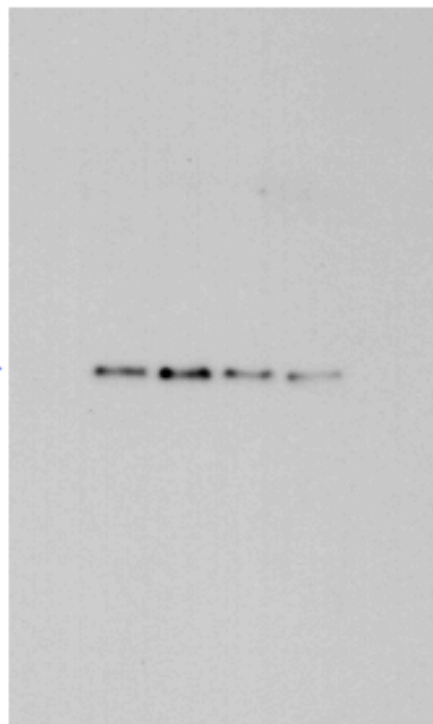

IB: V5

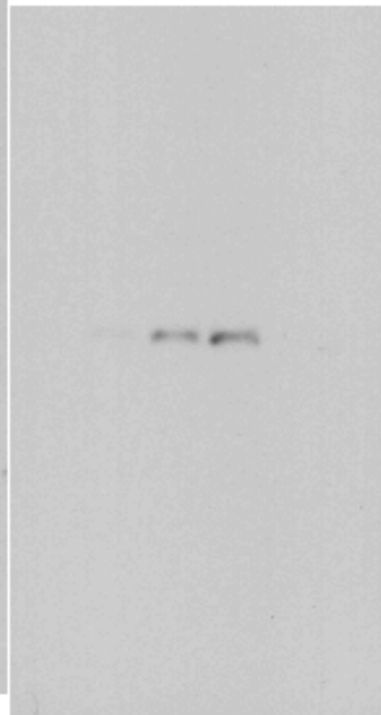

~47 kDa →

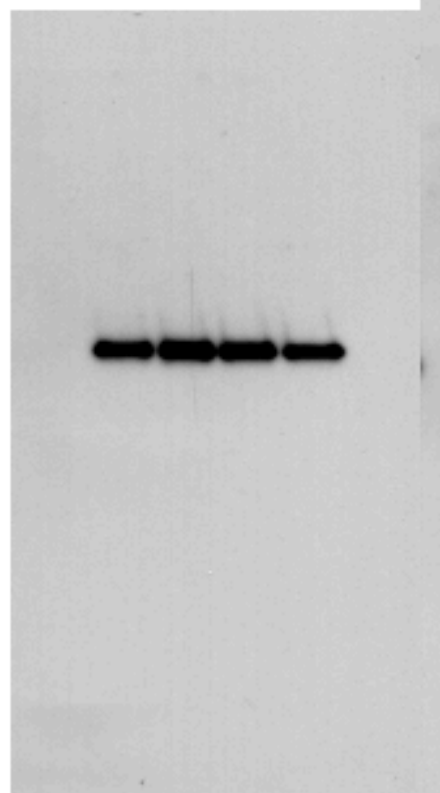

IB: Myc

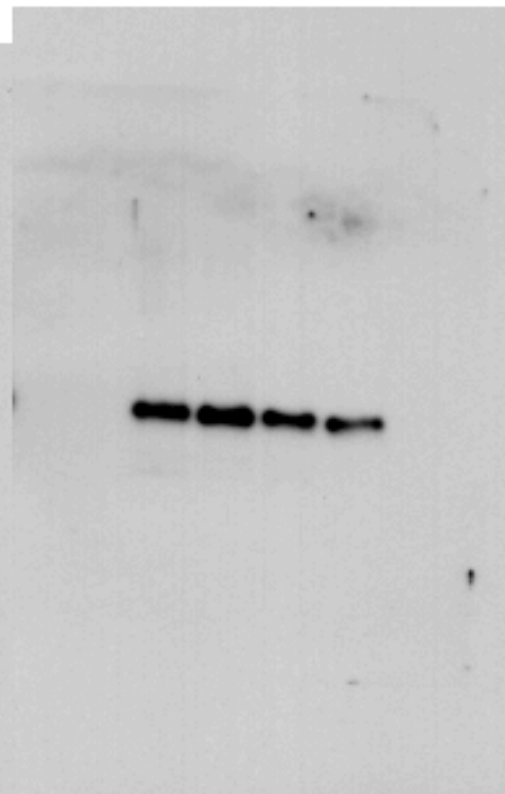

Supplement: fig4-data1 [file elife-82874-fig4-data1-v2.zip]
