# Supplementary material for: An extracellular vesicle targeting ligand that binds to Arc proteins and facilitates Arc transport in vivo
Source: eLife journal article supplement (doi:10.7554/elife.82874), 2023-06-16
Supplement: fig4-data3 [file elife-82874-fig4-data3-v2.zip]

## Peptide Binding Assay

|                                            |    |    |    |    |    |    |    |    |    |    |
|--------------------------------------------|----|----|----|----|----|----|----|----|----|----|
| Biotinylated sas <sup>ICD(WT)</sup>        | +  | -- | -- | -- | -- | +  | -- | -- | -- | -- |
| Biotinylated sas <sup>ICD(scrambled)</sup> | -- | +  | -- | -- | -- | -- | +  | -- | -- | -- |
| Biotinylated sas <sup>ICD(ΔYDNPSY)</sup>   | -- | -- | +  | -- | -- | -- | -- | +  | -- | -- |
| Biotinylated APP <sup>ICD</sup>            | -- | -- | -- | +  | -- | -- | -- | -- | +  | -- |
| Biotinylated App <sup>ICD</sup>            | -- | -- | -- | -- | -- | -- | -- | -- | -- | +  |

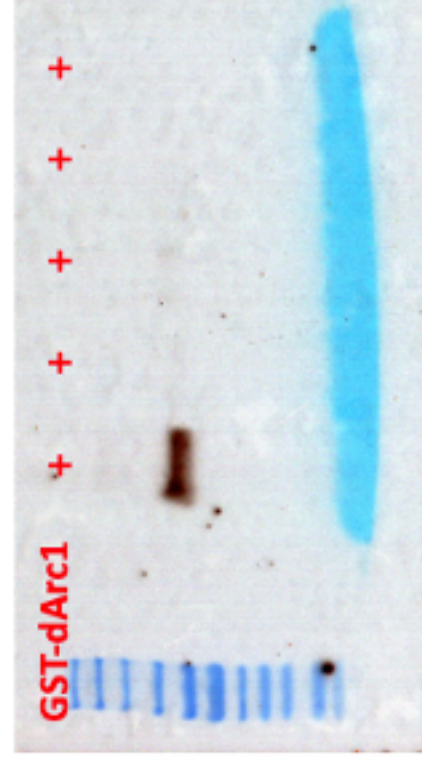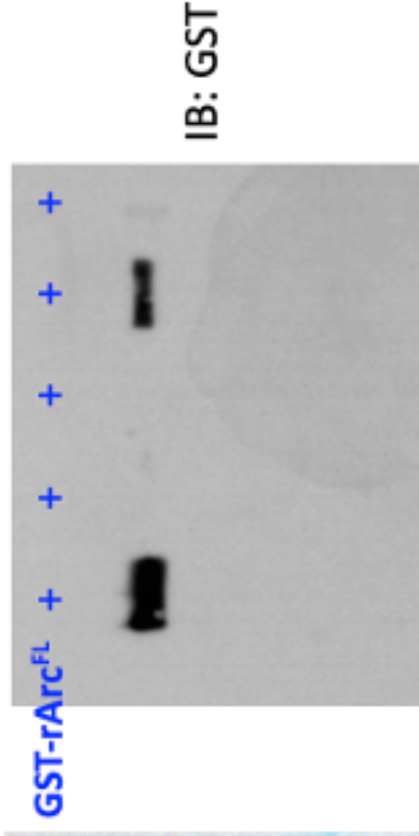

IB: GST
