# Supplementary material for: An extracellular vesicle targeting ligand that binds to Arc proteins and facilitates Arc transport in vivo
Source: eLife. 2023 Jun 16;12:e82874. doi: 10.7554/eLife.82874 (PMC10289811; doi:10.7554/eLife.82874)
Supplement: Figure 4—source data 4. [file elife-82874-fig4-data4.xlsx]

## Sheet: Sheet1
IPed molecules	V5-Sas-FL IP Relative enrichment
Sas	244.6
dArc1	21.5
SmE	12.9
Fat-spondin	8.7
Vkg	7.9
NHP2	6
SmF	5.7
dArc2	5.6
