# Supplementary figures and images for: An extracellular vesicle targeting ligand that binds to Arc proteins and facilitates Arc transport in vivo
Source: eLife journal article supplement (doi:10.7554/elife.82874), 2023-06-16

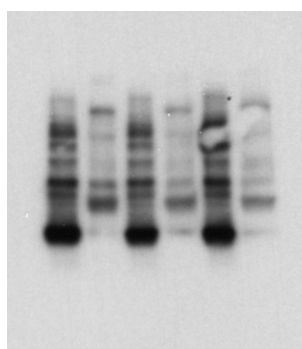

Supplement: fig1-data1 [file elife-82874-fig1-data1-v2.zip]

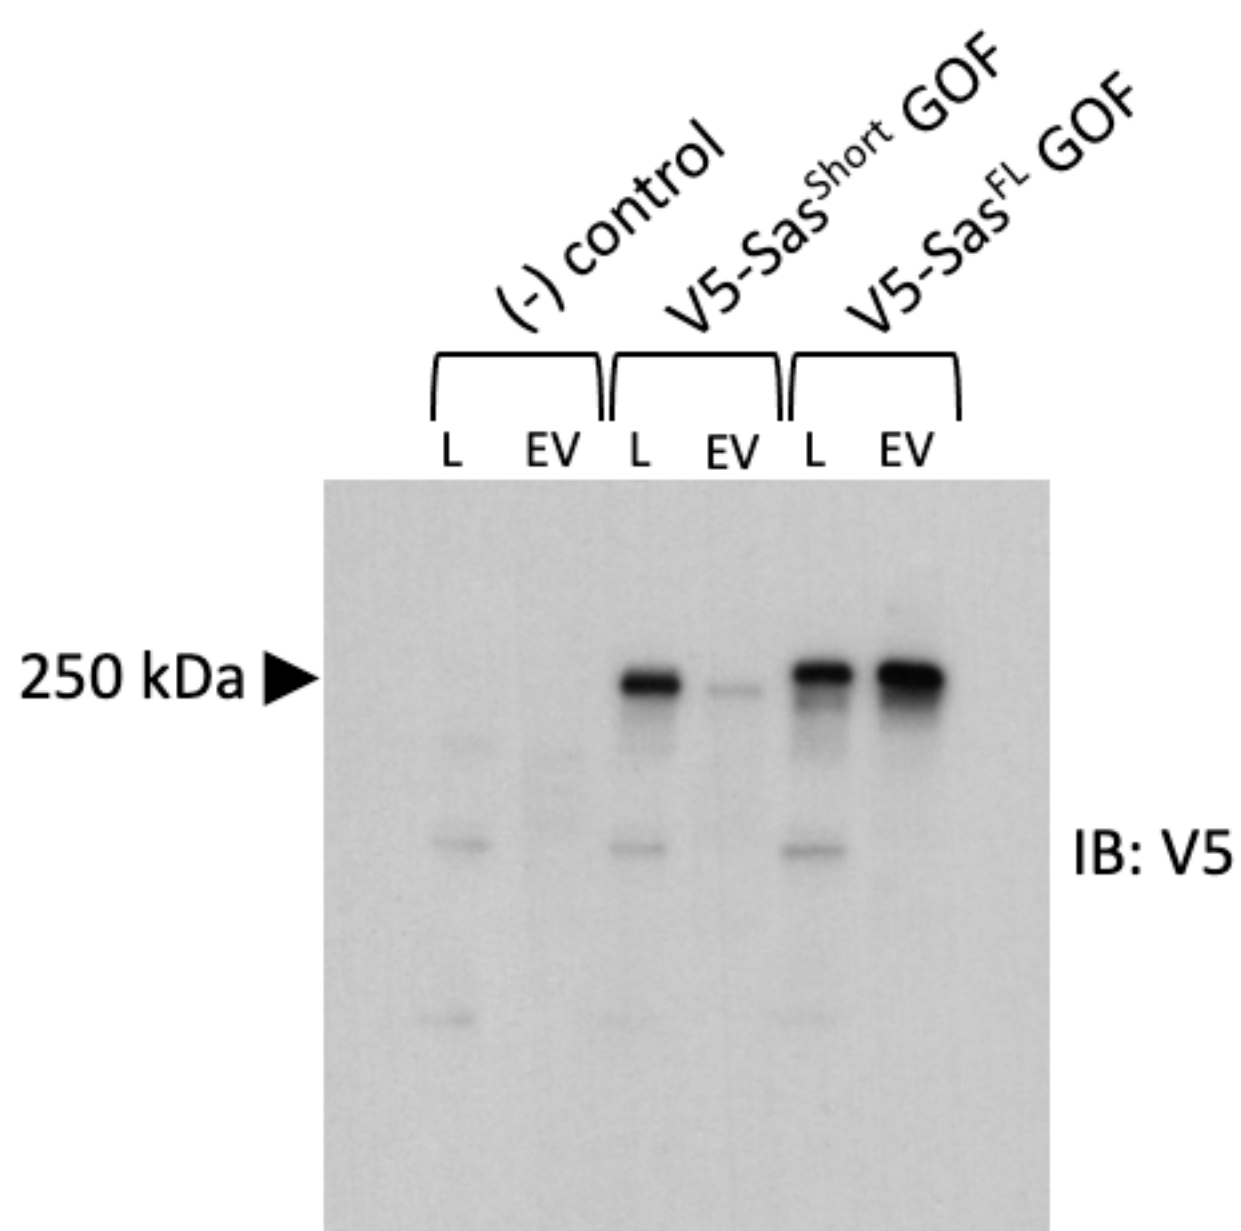

Supplement: fig1-data1 [file elife-82874-fig1-data1-v2.zip]

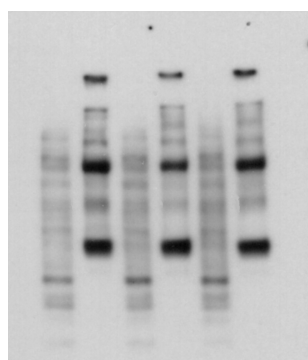

Supplement: fig1-data1 [file elife-82874-fig1-data1-v2.zip]

(-) control  
V5-Sas<sup>Short</sup> GOF  
V5-Sas<sup>FL</sup> GOF

L EV L EV L EV

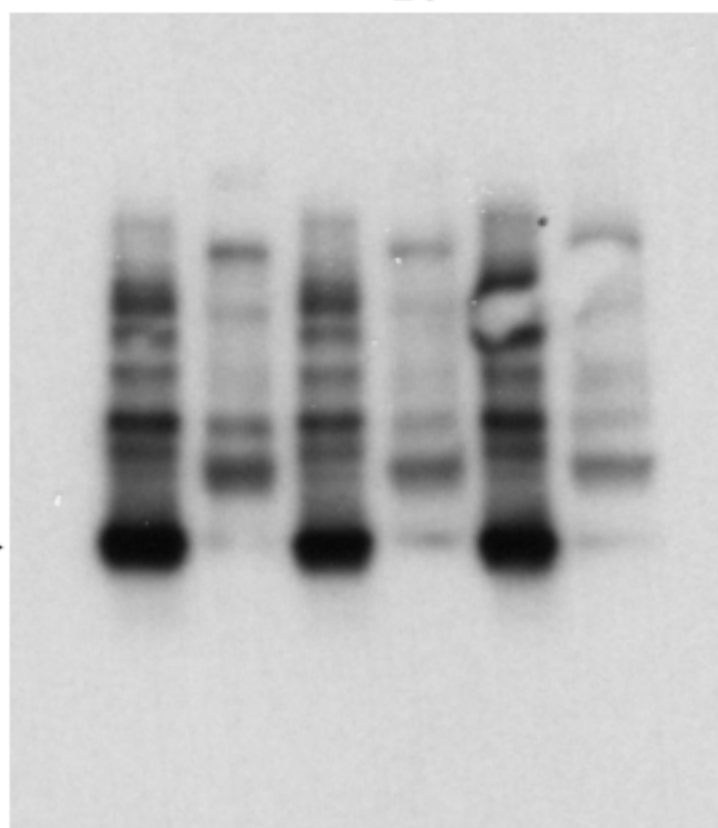

IB:  $\beta$ -Actin

42 kDa ►

Supplement: fig1-data1 [file elife-82874-fig1-data1-v2.zip]

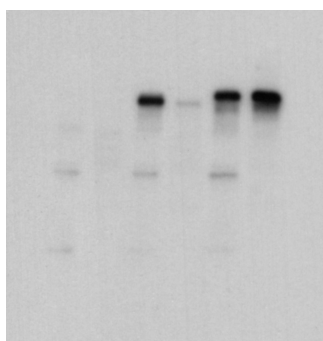

Supplement: fig1-data1 [file elife-82874-fig1-data1-v2.zip]

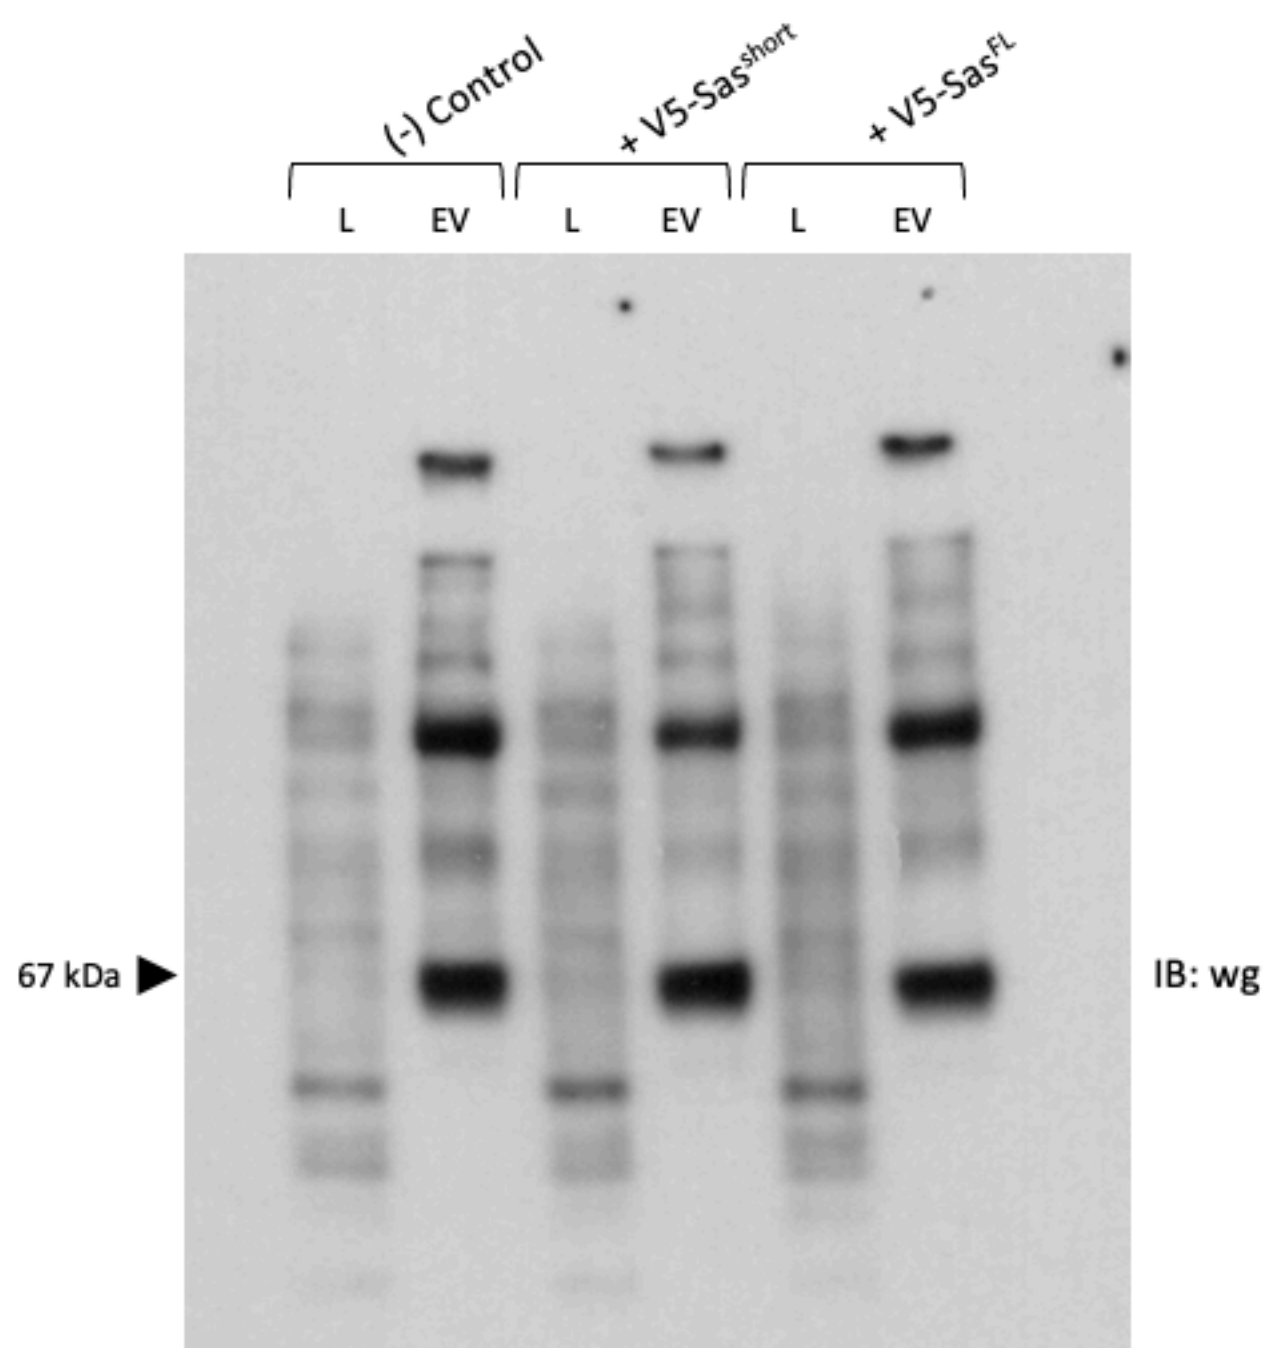

Supplement: fig1-data1 [file elife-82874-fig1-data1-v2.zip]

(-) control  
V5-Sas<sup>Short</sup> GOF  
V5-Sas<sup>FL</sup> GOF

L EV L EV L EV



IB:  $\beta$ -Actin

42 kDa ►

Supplement: fig1-data1 [file elife-82874-fig1-data1-v2.zip]

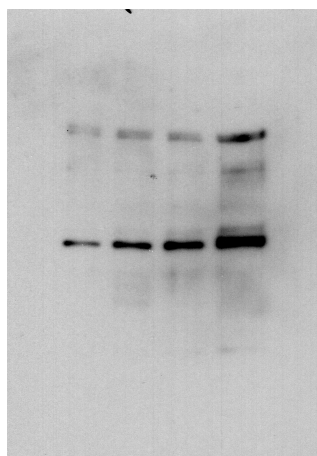

Supplement: fig3-data1 [file elife-82874-fig3-data1-v2.zip]

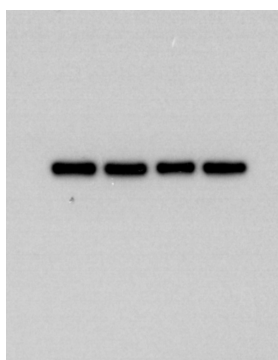

Supplement: fig3-data1 [file elife-82874-fig3-data1-v2.zip]

Add supernatant (EV fraction)  
from S2 cells expressing V5-Sas<sup>FL</sup>

(-)

+ Ptp10D

+ numb

+ Ptp10D & numb

250 kDa

IB: V5

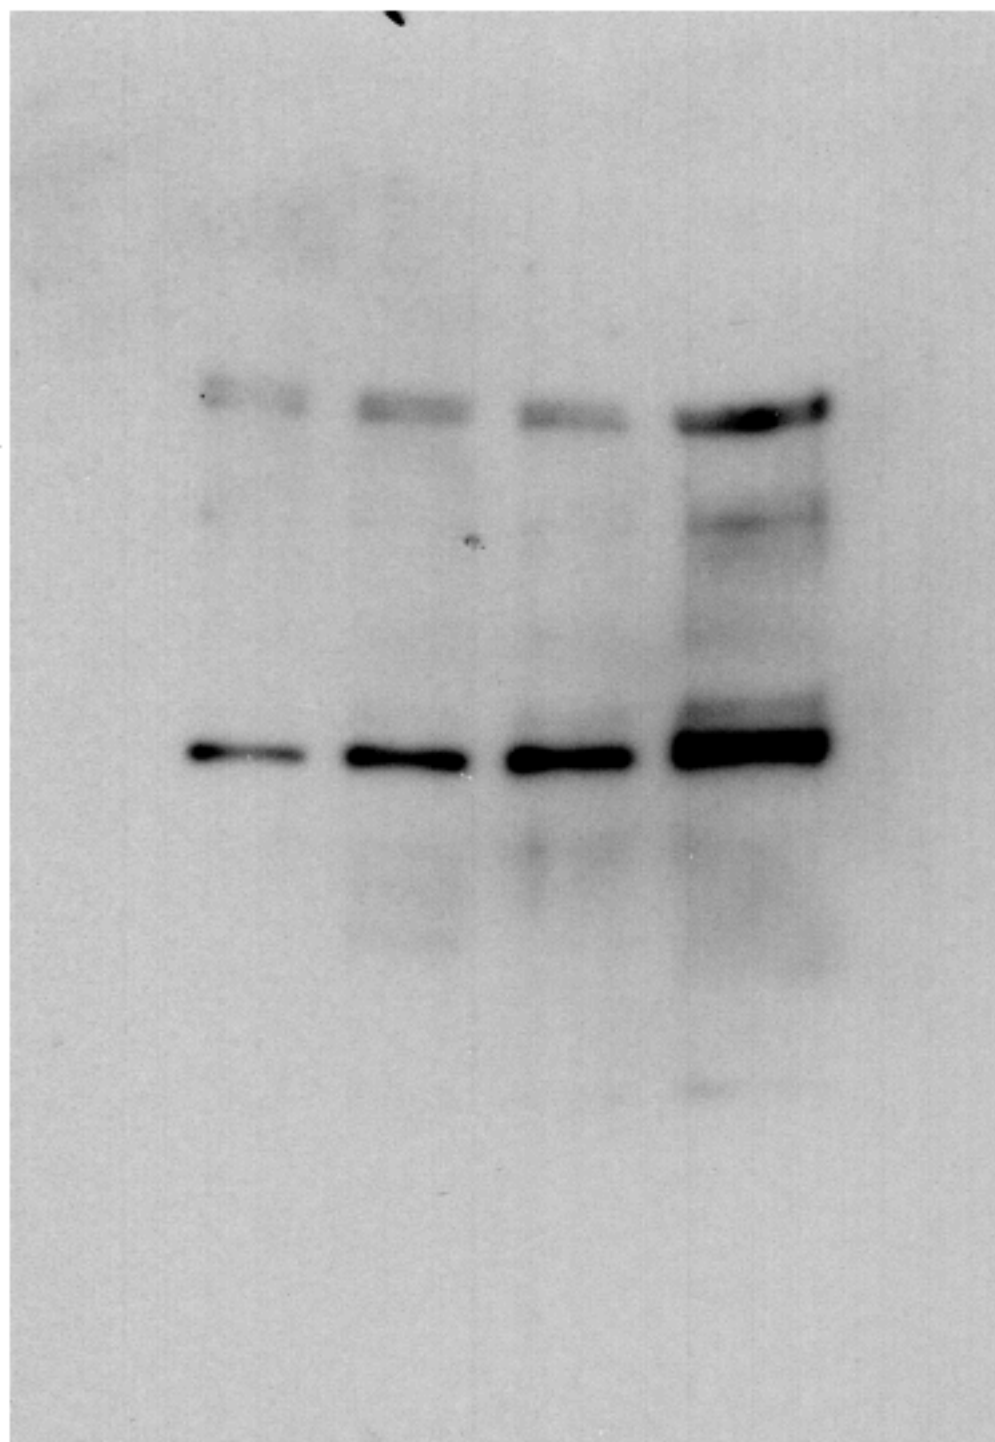

Supplement: fig3-data1 [file elife-82874-fig3-data1-v2.zip]

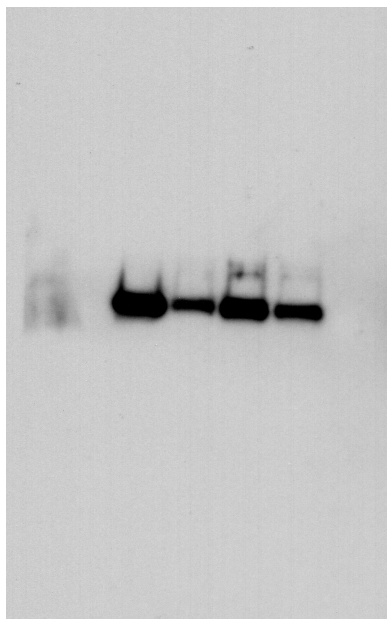

Supplement: fig4-data2 [file elife-82874-fig4-data2-v2.zip]

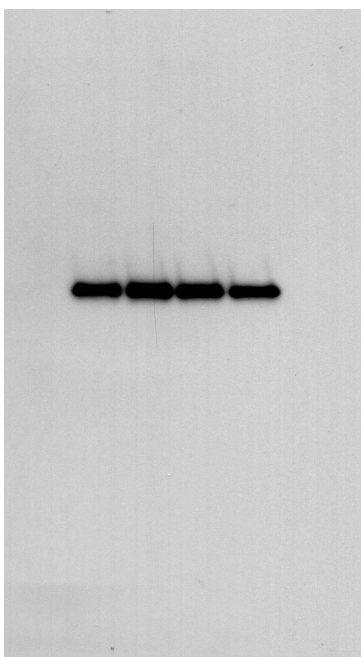

Supplement: fig4-data2 [file elife-82874-fig4-data2-v2.zip]

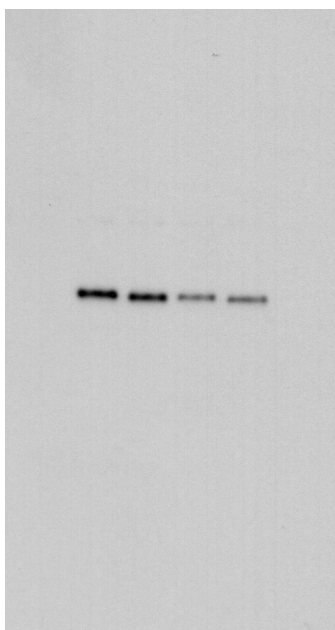

Supplement: fig4-data2 [file elife-82874-fig4-data2-v2.zip]

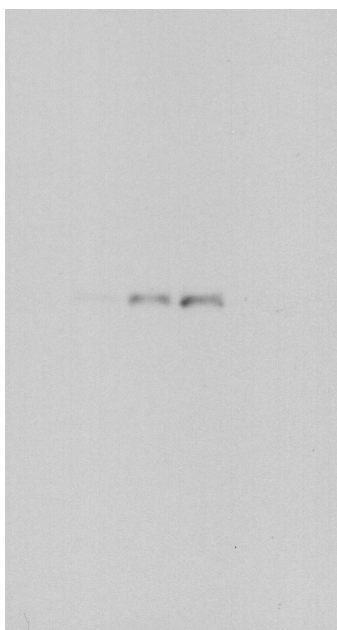

Supplement: fig4-data2 [file elife-82874-fig4-data2-v2.zip]

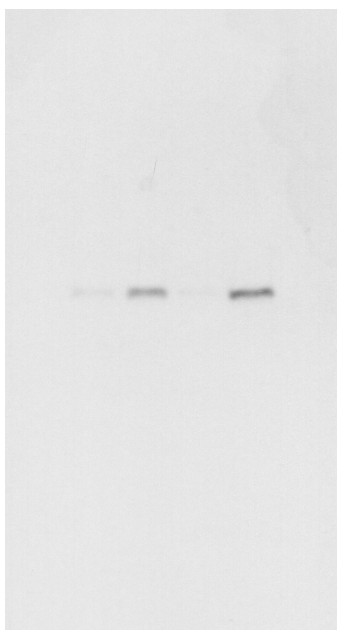

Supplement: fig4-data2 [file elife-82874-fig4-data2-v2.zip]

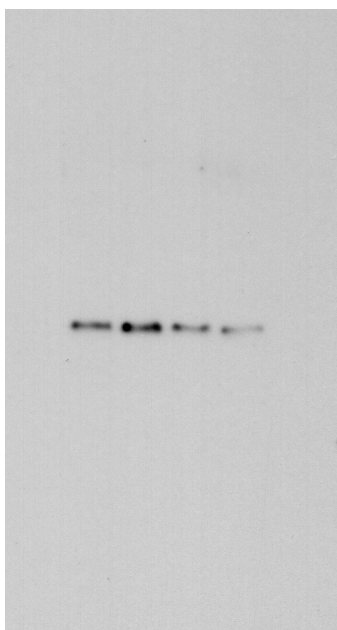

Supplement: fig4-data2 [file elife-82874-fig4-data2-v2.zip]

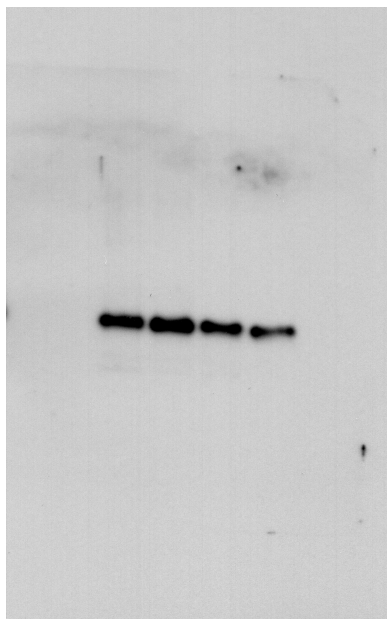

Supplement: fig4-data2 [file elife-82874-fig4-data2-v2.zip]

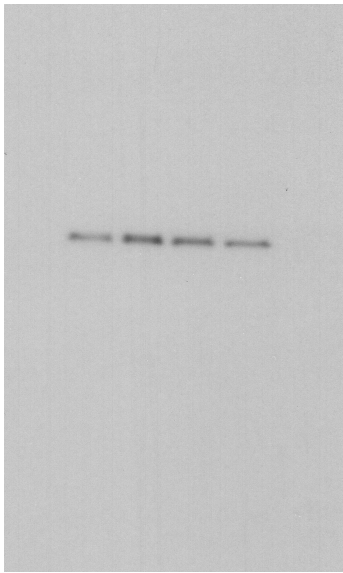

Supplement: fig4-data2 [file elife-82874-fig4-data2-v2.zip]

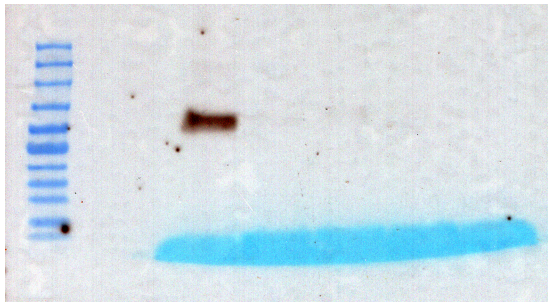

Supplement: fig4-data3 [file elife-82874-fig4-data3-v2.zip]

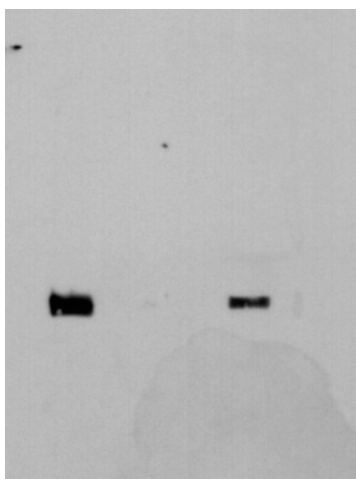

Supplement: fig4-data3 [file elife-82874-fig4-data3-v2.zip]



Supplement: fig4-data3 [file elife-82874-fig4-data3-v2.zip]
